# Supplementary material for: Resonance enhanced multiphoton ionization spectroscopy of NHD2via the B1E′′-state
Source: Royal Society of Chemistry journal article supplement (doi:10.1039/c3cp00012e), 2013-01-01
Supplement: c3cp00012e.log [file c3cp00012e.log]

Pgopher 7.1.294 14 Dec 2012 9:42 32 bit Unicode (Delphi 23/23)
Mixture: ND2H_b0x0_fitI.pgo
  Units               cm1
  PrintLevel          Detail
  Precision           4
  BasisOrder          boDiagonal
  QuantumNumberFormat J
  FitCycles           1
  FitDetails          False
  AutoReplot          True
  AllowComplex        True
  NoLineList          False
  ShowEstUnc          False
  ShowDerivatives     False
  SVDlimit            5
  SVDThresh    1E-15
  ScaleChanges 1
  Species: NH3
    Jmax 20
    Concentration 1
    AsymmetricMolecule: ND2H
      JAdjustSym     True
      BlockMatrix    True
      PointGroup     C2v
      Representation IIIl
      SReduction     True
      eeWt           2
      eoWt           1
      oeWt           1
      ooWt           2
      C2zAxis        b
      C2xAxis        c
      PseudoC2v      False
      FakeSym        False
      PhaseAdjust    False
      Abundance 1
      AsymmetricManifold: X
        Initial       True
        EigenSearch   True
        LimitSearch   True
        AutoQConverge True
        UsePopParams  False
        AsymmetricTop: X v=0
          Symmetry A1
          Kmin     all
          Kmax     all
          A      7.44571610800829
          B      5.34422284499232
          C      3.75295877523377
          DK     0.00021649109331
          DJK    -0.00048922453879
          DJ     0.00033360773205
          deltaK -5.270730259E-5
          deltaJ 0.00011290946885
          HK     -8.32558336073952E-8
          HKJ    1.92454444601138E-7
          HJK    -1.7011815220515E-7
          HJ     6.5600286048557E-8
          phiK   -4.38005615204636E-9
          phiJK  2.50100050882534E-8
          phiJ   -3.98168972616383E-8
          LKKJ   1.41721643978115E-10
          LJK    -1.27759418150539E-10
          LJJK   6.55713993979128E-11
          LJ     -2.02633416481745E-11
          llKJ   4.40553144268893E-12
          llJK   -1.1186874154119E-11
          llJ    1.46377911881959E-11
        <N  ,K-2|A|N,K> = (-sqrt((N*(N+1)+(-K+1)*(K-2))*(N*(N+1)-K*(K-1))))/4
        <N  ,K  |A|N,K> = (N*(N+1)-K^2)/2
        <N  ,K+2|A|N,K> = (-sqrt((N*(N+1)+(-K-1)*(K+2))*(N*(N+1)-K*(K+1))))/4
        <N  ,K-2|B|N,K> = sqrt((N*(N+1)+(-K+1)*(K-2))*(N*(N+1)-K*(K-1)))/4
        <N  ,K  |B|N,K> = (N*(N+1)-K^2)/2
        <N  ,K+2|B|N,K> = sqrt((N*(N+1)+(-K-1)*(K+2))*(N*(N+1)-K*(K+1)))/4
        <N  ,K  |C|N,K> = K^2
        <N  ,K  |DK|N,K> = -K^4
        <N  ,K  |DJK|N,K> = -N*(N+1)*K^2
        <N  ,K  |DJ|N,K> = -N^2*(N+1)^2
        <N  ,K-4|deltaK|N,K> = sqrt((N*(N+1)+(-K+1)*(K-2))*(N*(N+1)+(-K+2)*(K-3))*(N*(N+1)+(-K+3)*(K-4))*(N*(N+1)-K*(K-1)))
        <N  ,K+4|deltaK|N,K> = sqrt((N*(N+1)+(-K-1)*(K+2))*(N*(N+1)+(-K-2)*(K+3))*(N*(N+1)+(-K-3)*(K+4))*(N*(N+1)-K*(K+1)))
        <N  ,K-2|deltaJ|N,K> = N*(N+1)*sqrt((N*(N+1)+(-K+1)*(K-2))*(N*(N+1)-K*(K-1)))
        <N  ,K+2|deltaJ|N,K> = N*(N+1)*sqrt((N*(N+1)+(-K-1)*(K+2))*(N*(N+1)-K*(K+1)))
        <N  ,K  |HK|N,K> = K^6
        <N  ,K  |HKJ|N,K> = N*(N+1)*K^4
        <N  ,K  |HJK|N,K> = N^2*(N+1)^2*K^2
        <N  ,K  |HJ|N,K> = N^3*(N+1)^3
        <N  ,K-6|phiK|N,K> = sqrt((N*(N+1)+(-K+1)*(K-2))*(N*(N+1)+(-K+2)*(K-3))*(N*(N+1)+(-K+3)*(K-4))*(N*(N+1)+(-K+4)*(K-5))*(N*(N+1)+(-K+5)*(K-6))*(N*(N+1)-K*(K-1)))
        <N  ,K+6|phiK|N,K> = sqrt((N*(N+1)+(-K-1)*(K+2))*(N*(N+1)+(-K-2)*(K+3))*(N*(N+1)+(-K-3)*(K+4))*(N*(N+1)+(-K-4)*(K+5))*(N*(N+1)+(-K-5)*(K+6))*(N*(N+1)-K*(K+1)))
        <N  ,K-4|phiJK|N,K> = N*(N+1)*sqrt((N*(N+1)+(-K+1)*(K-2))*(N*(N+1)+(-K+2)*(K-3))*(N*(N+1)+(-K+3)*(K-4))*(N*(N+1)-K*(K-1)))
        <N  ,K+4|phiJK|N,K> = N*(N+1)*sqrt((N*(N+1)+(-K-1)*(K+2))*(N*(N+1)+(-K-2)*(K+3))*(N*(N+1)+(-K-3)*(K+4))*(N*(N+1)-K*(K+1)))
        <N  ,K-2|phiJ|N,K> = N^2*(N+1)^2*sqrt((N*(N+1)+(-K+1)*(K-2))*(N*(N+1)-K*(K-1)))
        <N  ,K+2|phiJ|N,K> = N^2*(N+1)^2*sqrt((N*(N+1)+(-K-1)*(K+2))*(N*(N+1)-K*(K+1)))
        <N  ,K  |LKKJ|N,K> = N*(N+1)*K^6
        <N  ,K  |LJK|N,K> = N^2*(N+1)^2*K^4
        <N  ,K  |LJJK|N,K> = N^3*(N+1)^3*K^2
        <N  ,K  |LJ|N,K> = N^4*(N+1)^4
        <N  ,K-6|llKJ|N,K> = N*(N+1)*sqrt((N*(N+1)+(-K+1)*(K-2))*(N*(N+1)+(-K+2)*(K-3))*(N*(N+1)+(-K+3)*(K-4))*(N*(N+1)+(-K+4)*(K-5))*(N*(N+1)+(-K+5)*(K-6))*(N*(N+1)-K*(K-1)))
        <N  ,K+6|llKJ|N,K> = N*(N+1)*sqrt((N*(N+1)+(-K-1)*(K+2))*(N*(N+1)+(-K-2)*(K+3))*(N*(N+1)+(-K-3)*(K+4))*(N*(N+1)+(-K-4)*(K+5))*(N*(N+1)+(-K-5)*(K+6))*(N*(N+1)-K*(K+1)))
        <N  ,K-4|llJK|N,K> = N^2*(N+1)^2*sqrt((N*(N+1)+(-K+1)*(K-2))*(N*(N+1)+(-K+2)*(K-3))*(N*(N+1)+(-K+3)*(K-4))*(N*(N+1)-K*(K-1)))
        <N  ,K+4|llJK|N,K> = N^2*(N+1)^2*sqrt((N*(N+1)+(-K-1)*(K+2))*(N*(N+1)+(-K-2)*(K+3))*(N*(N+1)+(-K-3)*(K+4))*(N*(N+1)-K*(K+1)))
        <N  ,K-2|llJ|N,K> = N^3*(N+1)^3*sqrt((N*(N+1)+(-K+1)*(K-2))*(N*(N+1)-K*(K-1)))
        <N  ,K+2|llJ|N,K> = N^3*(N+1)^3*sqrt((N*(N+1)+(-K-1)*(K+2))*(N*(N+1)-K*(K+1)))
        AsymmetricTop: X v=1
          Symmetry B1
          Kmin     all
          Kmax     all
          Origin 0.17074620102684
          A      7.44463850424816
          B      5.34386570325261
          C      3.753232634358
          DK     0.00021428221853
          DJK    -0.00048566602699
          DJ     0.00033205133866
          deltaK -5.246157393E-5
          deltaJ 0.00011210335985
          HK     -7.52335604119834E-8
          HKJ    1.77525710136444E-7
          HJK    -1.60856561641721E-7
          HJ     6.33245416734266E-8
          phiK   -3.95551445126748E-9
          phiJK  2.39341247870885E-8
          phiJ   -3.82401127649449E-8
          LKKJ   1.29665336677683E-10
          LJK    -1.06206474346996E-10
          LJJK   5.4187470586735E-11
          LJ     -1.84466615234196E-11
          llKJ   2.85383596941588E-12
          llJK   -9.62525081268055E-12
          llJ    1.35698300322152E-11
        <N  ,K-2|A|N,K> = (-sqrt((N*(N+1)+(-K+1)*(K-2))*(N*(N+1)-K*(K-1))))/4
        <N  ,K  |A|N,K> = (N*(N+1)-K^2)/2
        <N  ,K+2|A|N,K> = (-sqrt((N*(N+1)+(-K-1)*(K+2))*(N*(N+1)-K*(K+1))))/4
        <N  ,K-2|B|N,K> = sqrt((N*(N+1)+(-K+1)*(K-2))*(N*(N+1)-K*(K-1)))/4
        <N  ,K  |B|N,K> = (N*(N+1)-K^2)/2
        <N  ,K+2|B|N,K> = sqrt((N*(N+1)+(-K-1)*(K+2))*(N*(N+1)-K*(K+1)))/4
        <N  ,K  |C|N,K> = K^2
        <N  ,K  |DK|N,K> = -K^4
        <N  ,K  |DJK|N,K> = -N*(N+1)*K^2
        <N  ,K  |DJ|N,K> = -N^2*(N+1)^2
        <N  ,K-4|deltaK|N,K> = sqrt((N*(N+1)+(-K+1)*(K-2))*(N*(N+1)+(-K+2)*(K-3))*(N*(N+1)+(-K+3)*(K-4))*(N*(N+1)-K*(K-1)))
        <N  ,K+4|deltaK|N,K> = sqrt((N*(N+1)+(-K-1)*(K+2))*(N*(N+1)+(-K-2)*(K+3))*(N*(N+1)+(-K-3)*(K+4))*(N*(N+1)-K*(K+1)))
        <N  ,K-2|deltaJ|N,K> = N*(N+1)*sqrt((N*(N+1)+(-K+1)*(K-2))*(N*(N+1)-K*(K-1)))
        <N  ,K+2|deltaJ|N,K> = N*(N+1)*sqrt((N*(N+1)+(-K-1)*(K+2))*(N*(N+1)-K*(K+1)))
        <N  ,K  |HK|N,K> = K^6
        <N  ,K  |HKJ|N,K> = N*(N+1)*K^4
        <N  ,K  |HJK|N,K> = N^2*(N+1)^2*K^2
        <N  ,K  |HJ|N,K> = N^3*(N+1)^3
        <N  ,K-6|phiK|N,K> = sqrt((N*(N+1)+(-K+1)*(K-2))*(N*(N+1)+(-K+2)*(K-3))*(N*(N+1)+(-K+3)*(K-4))*(N*(N+1)+(-K+4)*(K-5))*(N*(N+1)+(-K+5)*(K-6))*(N*(N+1)-K*(K-1)))
        <N  ,K+6|phiK|N,K> = sqrt((N*(N+1)+(-K-1)*(K+2))*(N*(N+1)+(-K-2)*(K+3))*(N*(N+1)+(-K-3)*(K+4))*(N*(N+1)+(-K-4)*(K+5))*(N*(N+1)+(-K-5)*(K+6))*(N*(N+1)-K*(K+1)))
        <N  ,K-4|phiJK|N,K> = N*(N+1)*sqrt((N*(N+1)+(-K+1)*(K-2))*(N*(N+1)+(-K+2)*(K-3))*(N*(N+1)+(-K+3)*(K-4))*(N*(N+1)-K*(K-1)))
        <N  ,K+4|phiJK|N,K> = N*(N+1)*sqrt((N*(N+1)+(-K-1)*(K+2))*(N*(N+1)+(-K-2)*(K+3))*(N*(N+1)+(-K-3)*(K+4))*(N*(N+1)-K*(K+1)))
        <N  ,K-2|phiJ|N,K> = N^2*(N+1)^2*sqrt((N*(N+1)+(-K+1)*(K-2))*(N*(N+1)-K*(K-1)))
        <N  ,K+2|phiJ|N,K> = N^2*(N+1)^2*sqrt((N*(N+1)+(-K-1)*(K+2))*(N*(N+1)-K*(K+1)))
        <N  ,K  |LKKJ|N,K> = N*(N+1)*K^6
        <N  ,K  |LJK|N,K> = N^2*(N+1)^2*K^4
        <N  ,K  |LJJK|N,K> = N^3*(N+1)^3*K^2
        <N  ,K  |LJ|N,K> = N^4*(N+1)^4
        <N  ,K-6|llKJ|N,K> = N*(N+1)*sqrt((N*(N+1)+(-K+1)*(K-2))*(N*(N+1)+(-K+2)*(K-3))*(N*(N+1)+(-K+3)*(K-4))*(N*(N+1)+(-K+4)*(K-5))*(N*(N+1)+(-K+5)*(K-6))*(N*(N+1)-K*(K-1)))
        <N  ,K+6|llKJ|N,K> = N*(N+1)*sqrt((N*(N+1)+(-K-1)*(K+2))*(N*(N+1)+(-K-2)*(K+3))*(N*(N+1)+(-K-3)*(K+4))*(N*(N+1)+(-K-4)*(K+5))*(N*(N+1)+(-K-5)*(K+6))*(N*(N+1)-K*(K+1)))
        <N  ,K-4|llJK|N,K> = N^2*(N+1)^2*sqrt((N*(N+1)+(-K+1)*(K-2))*(N*(N+1)+(-K+2)*(K-3))*(N*(N+1)+(-K+3)*(K-4))*(N*(N+1)-K*(K-1)))
        <N  ,K+4|llJK|N,K> = N^2*(N+1)^2*sqrt((N*(N+1)+(-K-1)*(K+2))*(N*(N+1)+(-K-2)*(K+3))*(N*(N+1)+(-K-3)*(K+4))*(N*(N+1)-K*(K+1)))
        <N  ,K-2|llJ|N,K> = N^3*(N+1)^3*sqrt((N*(N+1)+(-K+1)*(K-2))*(N*(N+1)-K*(K-1)))
        <N  ,K+2|llJ|N,K> = N^3*(N+1)^3*sqrt((N*(N+1)+(-K-1)*(K+2))*(N*(N+1)-K*(K+1)))
        AsymmetricTopPerturbation: X <v=1|bc|v=0>
          Value 0.10395943649789
        <N  ,K-1|bc|N,K> = (sqrt(N*(N+1)-K*(K-1))*(2*K-1))/2
        <N  ,K+1|bc|N,K> = (sqrt(N*(N+1)-K*(K+1))*(2*K+1))/2

        AsymmetricTopPerturbation: X <v=1|J^2bc|v=0>
          Value -1.839105638E-5
        <N  ,K-1|J^2bc|N,K> = (N*(N+1)*sqrt(N*(N+1)-K*(K-1))*(2*K-1))/2
        <N  ,K+1|J^2bc|N,K> = (N*(N+1)*sqrt(N*(N+1)-K*(K+1))*(2*K+1))/2

      AsymmetricManifold: B
        Initial       True
        EigenSearch   True
        LimitSearch   True
        AutoQConverge True
        UsePopParams  False
        AsymmetricTop: B A2
          Colour   Navy
          Symmetry A2
          Kmin     all
          Kmax     all
          Origin 59349.1788457683           Float, Increment = 0.1
          A      8.43730916399015           Float, Increment = 0.001
          B      5.20621754384586           Float, Increment = 0.001
          C      3.89436731652269           Float, Increment = 0.001
        <N  ,K-2|A|N,K> = (-sqrt((N*(N+1)+(-K+1)*(K-2))*(N*(N+1)-K*(K-1))))/4
        <N  ,K  |A|N,K> = (N*(N+1)-K^2)/2
        <N  ,K+2|A|N,K> = (-sqrt((N*(N+1)+(-K-1)*(K+2))*(N*(N+1)-K*(K+1))))/4
        <N  ,K-2|B|N,K> = sqrt((N*(N+1)+(-K+1)*(K-2))*(N*(N+1)-K*(K-1)))/4
        <N  ,K  |B|N,K> = (N*(N+1)-K^2)/2
        <N  ,K+2|B|N,K> = sqrt((N*(N+1)+(-K-1)*(K+2))*(N*(N+1)-K*(K+1)))/4
        <N  ,K  |C|N,K> = K^2
        AsymmetricTop: B B1
          Colour   Maroon
          Symmetry B1
          Kmin     all
          Kmax     all
          Origin 59314.3437465916           Float, Increment = 0.1
          A      7.50736037403525           Float, Increment = 0.001
          B      5.51047912805756           Float, Increment = 0.001
          C      2.55025419982813           Float, Increment = 0.001
        <N  ,K-2|A|N,K> = (-sqrt((N*(N+1)+(-K+1)*(K-2))*(N*(N+1)-K*(K-1))))/4
        <N  ,K  |A|N,K> = (N*(N+1)-K^2)/2
        <N  ,K+2|A|N,K> = (-sqrt((N*(N+1)+(-K-1)*(K+2))*(N*(N+1)-K*(K+1))))/4
        <N  ,K-2|B|N,K> = sqrt((N*(N+1)+(-K+1)*(K-2))*(N*(N+1)-K*(K-1)))/4
        <N  ,K  |B|N,K> = (N*(N+1)-K^2)/2
        <N  ,K+2|B|N,K> = sqrt((N*(N+1)+(-K-1)*(K+2))*(N*(N+1)-K*(K+1)))/4
        <N  ,K  |C|N,K> = K^2
        AsymmetricTopPerturbation: B <A2|c|B1>
        AsymmetricTopPerturbation: B <A2|ab|B1>
      TransitionMoments: <B|mu|X>
        SphericalTransitionMoment: <A2|T(2,1)|v=0>
          Rank      2
          Component 1
          Strength 1
        Reduced Matrix Elements of <A2|T(2,1)|v=0>
        <N-2,K-1|T(2,1)|N,K> = -1^(2*N-2*K-5)*sqrt(((N-K)*(N+K)*(N+K-1)*(N+K-2))/(N*(2*N-1)*(N-1)))
        <N-2,K+1|T(2,1)|N,K> = -1^(2*N-2*K-7)*sqrt(((N-K)*(N-K-1)*(N-K-2)*(N+K))/(N*(2*N-1)*(N-1)))
        <N-1,K-1|T(2,1)|N,K> = -1^(2*N-2*K-3)*(N-2*K+1)*sqrt(((N+K)*(N+K-1))/(2*N*(N-1)*(N+1)))
        <N-1,K+1|T(2,1)|N,K> = -1^(2*N-2*K-5)*(-N-2*K-1)*sqrt(((N-K)*(N-K-1))/(2*N*(N-1)*(N+1)))
        <N  ,K-1|T(2,1)|N,K> = (-1^(2*N-2*K-1)*(2*N+1)*sqrt((6*(N-K+1)*(N+K))/(N*(2*N-1)*(2*N+1)*(2*N+3)*(N+1)))*(-2*K+1))/2
        <N  ,K+1|T(2,1)|N,K> = (-1^(2*N-2*K-3)*(2*N+1)*sqrt((6*(N-K)*(N+K+1))/(N*(2*N-1)*(2*N+1)*(2*N+3)*(N+1)))*(2*K+1))/2
        <N+1,K-1|T(2,1)|N,K> = -1^(2*N-2*K+1)*(-N-2*K)*sqrt(((N-K+1)*(N-K+2))/(2*N*(N+1)*(N+2)))
        <N+1,K+1|T(2,1)|N,K> = -1^(2*N-2*K-1)*(N-2*K)*sqrt(((N+K+1)*(N+K+2))/(2*N*(N+1)*(N+2)))
        <N+2,K-1|T(2,1)|N,K> = -1^(2*(N-K+2))*sqrt(((N-K+1)*(N-K+2)*(N-K+3)*(N+K+1))/((2*N+3)*(N+1)*(N+2)))
        <N+2,K+1|T(2,1)|N,K> = -1^(2*(N-K+1))*sqrt(((N-K+1)*(N+K+1)*(N+K+2)*(N+K+3))/((2*N+3)*(N+1)*(N+2)))
        Line Strengths from <A2|T(2,1)|v=0>
        <N-2,K-1|T(2,1)|N,K> = (-1^(2*(2*N-2*K-5))*(N-K)*(N+K)*(N+K-1)*(N+K-2))/(N*(2*N-1)*(N-1))
        <N-2,K+1|T(2,1)|N,K> = (-1^(2*(2*N-2*K-7))*(N-K)*(N-K-1)*(N-K-2)*(N+K))/(N*(2*N-1)*(N-1))
        <N-1,K-1|T(2,1)|N,K> = (-1^(2*(2*N-2*K-3))*(N-2*K+1)^2*(N+K)*(N+K-1))/(2*N*(N-1)*(N+1))
        <N-1,K+1|T(2,1)|N,K> = (-1^(2*(2*N-2*K-5))*(-N-2*K-1)^2*(N-K)*(N-K-1))/(2*N*(N-1)*(N+1))
        <N  ,K-1|T(2,1)|N,K> = (3*-1^(2*(2*N-2*K-1))*(2*N+1)*(N-K+1)*(N+K)*(-2*K+1)^2)/(2*N*(2*N-1)*(2*N+3)*(N+1))
        <N  ,K+1|T(2,1)|N,K> = (3*-1^(2*(2*N-2*K-3))*(2*N+1)*(N-K)*(N+K+1)*(2*K+1)^2)/(2*N*(2*N-1)*(2*N+3)*(N+1))
        <N+1,K-1|T(2,1)|N,K> = (-1^(2*(2*N-2*K+1))*(-N-2*K)^2*(N-K+1)*(N-K+2))/(2*N*(N+1)*(N+2))
        <N+1,K+1|T(2,1)|N,K> = (-1^(2*(2*N-2*K-1))*(N-2*K)^2*(N+K+1)*(N+K+2))/(2*N*(N+1)*(N+2))
        <N+2,K-1|T(2,1)|N,K> = (-1^(4*(N-K+2))*(N-K+1)*(N-K+2)*(N-K+3)*(N+K+1))/((2*N+3)*(N+1)*(N+2))
        <N+2,K+1|T(2,1)|N,K> = (-1^(4*(N-K+1))*(N-K+1)*(N+K+1)*(N+K+2)*(N+K+3))/((2*N+3)*(N+1)*(N+2))

        SphericalTransitionMoment: <B1|T(2,-1)|v=0>
          Rank      2
          Component -1
          Strength 1
        Reduced Matrix Elements of <B1|T(2,-1)|v=0>
        <N-2,K-1|T(2,-1)|N,K> = -1^(2*(N-K-2))*sqrt(((N-K)*(N+K)*(N+K-1)*(N+K-2))/(N*(2*N-1)*(N-1)))
        <N-2,K+1|T(2,-1)|N,K> = -1^(2*N-2*K-7)*sqrt(((N-K)*(N-K-1)*(N-K-2)*(N+K))/(N*(2*N-1)*(N-1)))
        <N-1,K-1|T(2,-1)|N,K> = -1^(2*(N-K-1))*(N-2*K+1)*sqrt(((N+K)*(N+K-1))/(2*N*(N-1)*(N+1)))
        <N-1,K+1|T(2,-1)|N,K> = -1^(2*N-2*K-5)*(-N-2*K-1)*sqrt(((N-K)*(N-K-1))/(2*N*(N-1)*(N+1)))
        <N  ,K-1|T(2,-1)|N,K> = (-1^(2*(N-K))*(2*N+1)*sqrt((6*(N-K+1)*(N+K))/(N*(2*N-1)*(2*N+1)*(2*N+3)*(N+1)))*(-2*K+1))/2
        <N  ,K+1|T(2,-1)|N,K> = (-1^(2*N-2*K-3)*(2*N+1)*sqrt((6*(N-K)*(N+K+1))/(N*(2*N-1)*(2*N+1)*(2*N+3)*(N+1)))*(2*K+1))/2
        <N+1,K-1|T(2,-1)|N,K> = -1^(2*(N-K+1))*(-N-2*K)*sqrt(((N-K+1)*(N-K+2))/(2*N*(N+1)*(N+2)))
        <N+1,K+1|T(2,-1)|N,K> = -1^(2*N-2*K-1)*(N-2*K)*sqrt(((N+K+1)*(N+K+2))/(2*N*(N+1)*(N+2)))
        <N+2,K-1|T(2,-1)|N,K> = -1^(2*N-2*K+5)*sqrt(((N-K+1)*(N-K+2)*(N-K+3)*(N+K+1))/((2*N+3)*(N+1)*(N+2)))
        <N+2,K+1|T(2,-1)|N,K> = -1^(2*(N-K+1))*sqrt(((N-K+1)*(N+K+1)*(N+K+2)*(N+K+3))/((2*N+3)*(N+1)*(N+2)))
        Line Strengths from <B1|T(2,-1)|v=0>
        <N-2,K-1|T(2,-1)|N,K> = (-1^(4*(N-K-2))*(N-K)*(N+K)*(N+K-1)*(N+K-2))/(N*(2*N-1)*(N-1))
        <N-2,K+1|T(2,-1)|N,K> = (-1^(2*(2*N-2*K-7))*(N-K)*(N-K-1)*(N-K-2)*(N+K))/(N*(2*N-1)*(N-1))
        <N-1,K-1|T(2,-1)|N,K> = (-1^(4*(N-K-1))*(N-2*K+1)^2*(N+K)*(N+K-1))/(2*N*(N-1)*(N+1))
        <N-1,K+1|T(2,-1)|N,K> = (-1^(2*(2*N-2*K-5))*(-N-2*K-1)^2*(N-K)*(N-K-1))/(2*N*(N-1)*(N+1))
        <N  ,K-1|T(2,-1)|N,K> = (3*-1^(4*(N-K))*(2*N+1)*(N-K+1)*(N+K)*(-2*K+1)^2)/(2*N*(2*N-1)*(2*N+3)*(N+1))
        <N  ,K+1|T(2,-1)|N,K> = (3*-1^(2*(2*N-2*K-3))*(2*N+1)*(N-K)*(N+K+1)*(2*K+1)^2)/(2*N*(2*N-1)*(2*N+3)*(N+1))
        <N+1,K-1|T(2,-1)|N,K> = (-1^(4*(N-K+1))*(-N-2*K)^2*(N-K+1)*(N-K+2))/(2*N*(N+1)*(N+2))
        <N+1,K+1|T(2,-1)|N,K> = (-1^(2*(2*N-2*K-1))*(N-2*K)^2*(N+K+1)*(N+K+2))/(2*N*(N+1)*(N+2))
        <N+2,K-1|T(2,-1)|N,K> = (-1^(2*(2*N-2*K+5))*(N-K+1)*(N-K+2)*(N-K+3)*(N+K+1))/((2*N+3)*(N+1)*(N+2))
        <N+2,K+1|T(2,-1)|N,K> = (-1^(4*(N-K+1))*(N-K+1)*(N+K+1)*(N+K+2)*(N+K+3))/((2*N+3)*(N+1)*(N+2))


Residuals before fit for ND2H for the B - X Transition
    J' S' #'    J" S" #"     Observed    Calculated      Obs-Calc StdDev 
    1 E+  2     2 E-  1    59330.6450    59330.4997        0.1453 1       :B A2  1  0  1 - X v=0  2  1  2:: .00144 :   5:ND2H_b0x0.lin
    1 O+  1     1 O+  1    59354.0270    59353.7253        0.3017 1       :B A2  1  1  0 - X v=0  1  0  1:: .00764 :   6:ND2H_b0x0.lin
    1 O+  1     2 O-  2    59323.9090    59323.9534       -0.0444 1       :B A2  1  1  0 - X v=0  2  2  1:: .00049 :   7:ND2H_b0x0.lin
    1 E-  2     2 E+  1    59335.0980    59334.8540        0.2440 1       :B A2  1  1  1 - X v=0  2  0  2:: .00551 :   8:ND2H_b0x0.lin
    1 E-  2     2 E+  3    59322.0340    59322.0087        0.0253 1       :B A2  1  1  1 - X v=0  2  2  0::  .0011 :   9:ND2H_b0x0.lin
    2 O+  2     1 O-  1    59365.2080    59364.9638        0.2442 1       :B A2  2  0  2 - X v=0  1  1  1:: .01143 :  10:ND2H_b0x0.lin
    2 O+  2     3 O-  1    59323.9090    59323.8388        0.0702 1       :B A2  2  0  2 - X v=0  3  1  3:: .00128 :  11:ND2H_b0x0.lin
    2 E+  2     0 E+  1    59382.5930    59382.3354        0.2576 2       :B A2  2  1  1 - X v=0  0  0  0:: .02104 :  12:ND2H_b0x0.lin
    2 E+  2     0 E+  1    59382.5930    59382.3354        0.2576 2       :B A2  2  1  1 - X v=0  0  0  0:: .02085 :  13:ND2H_b0x0.lin
    2 E+  2     2 E+  1    59356.0780    59355.6789        0.3991 1       :B A2  2  1  1 - X v=0  2  0  2:: .00489 :  14:ND2H_b0x0.lin
    2 O-  3     1 O+  1    59369.3650    59369.3028        0.0622 1       :B A2  2  1  2 - X v=0  1  0  1:: .00173 :  15:ND2H_b0x0.lin
    2 O+  3     1 O-  1    59380.7990    59381.1624       -0.3634 1       :B A2  2  2  0 - X v=0  1  1  1:: .01268 :  16:ND2H_b0x0.lin
    2 O+  3     1 O-  1    59380.7770    59381.1624       -0.3854 1       :B A2  2  2  0 - X v=0  1  1  1:: .01289 :  17:ND2H_b0x0.lin
    2 O+  3     2 O+  2    59359.4480    59359.7626       -0.3146 1       :B A2  2  2  0 - X v=0  2  1  1:: .00226 :  18:ND2H_b0x0.lin
    3 E+  3     1 E+  2    59389.2800    59389.4731       -0.1931 1       :B A2  3  0  3 - X v=0  1  1  0:: .00129 :  19:ND2H_b0x0.lin
    3 O+  2     1 O+  1    59401.9640    59402.2723       -0.3083 1       :B A2  3  1  2 - X v=0  1  0  1:: .00761 :  20:ND2H_b0x0.lin
    3 E+  4     1 E+  2    59408.1720    59408.0473        0.1247 1       :B A2  3  2  1 - X v=0  1  1  0:: .00515 :  21:ND2H_b0x0.lin
    3 E+  4     2 E-  1    59393.0810    59393.0637        0.0173 1       :B A2  3  2  1 - X v=0  2  1  2:: .00117 :  22:ND2H_b0x0.lin
    3 O-  3     1 O-  1    59408.1720    59408.1389        0.0331 1       :B A2  3  2  2 - X v=0  1  1  1:: .00583 :  23:ND2H_b0x0.lin
    3 O+  3     2 O-  2    59399.6890    59400.1321       -0.4431 1       :B A2  3  3  0 - X v=0  2  2  1:: .00141 :  24:ND2H_b0x0.lin
    3 E-  4     2 E+  3    59398.9830    59399.4470       -0.4640 1       :B A2  3  3  1 - X v=0  2  2  0:: .00212 :  25:ND2H_b0x0.lin
    4 E+  2     2 E+  1    59422.1370    59422.9155       -0.7785 1       :B A2  4  1  3 - X v=0  2  0  2:: .00402 :  26:ND2H_b0x0.lin
    4 O+  4     2 O+  2    59427.1020    59426.8767        0.2253 1       :B A2  4  2  2 - X v=0  2  1  1:: .00377 :  27:ND2H_b0x0.lin
    4 E+  4     2 E+  3    59437.5020    59436.7250        0.7770 1       :B A2  4  3  1 - X v=0  2  2  0:: .00123 :  28:ND2H_b0x0.lin
    4 O-  5     2 O-  2    59437.5020    59437.0055        0.4965 1       :B A2  4  3  2 - X v=0  2  2  1:: .00053 :  29:ND2H_b0x0.lin
    1 E-  1     2 E+  3    59282.5210    59282.9027       -0.3817 1       :B B1  1  0  1 - X v=0  2  2  0:: .00414 :  32:ND2H_b0x0.lin
    1 O-  1     1 O-  1    59316.4490    59316.1700        0.2790 1       :B B1  1  1  0 - X v=0  1  1  1::  .0131 :  33:ND2H_b0x0.lin
    1 O-  1     2 O+  2    59294.8240    59294.7702        0.0538 1       :B B1  1  1  0 - X v=0  2  1  1:: .00156 :  34:ND2H_b0x0.lin
    1 E+  1     1 E+  2    59311.3850    59311.6052       -0.2202 1       :B B1  1  1  1 - X v=0  1  1  0:: .00766 :  35:ND2H_b0x0.lin
    1 E+  1     2 E-  1    59296.4030    59296.6216       -0.2186 1       :B B1  1  1  1 - X v=0  2  1  2:: .00076 :  36:ND2H_b0x0.lin
    2 O-  1     2 O-  2    59297.5650    59297.9712       -0.4062 1       :B B1  2  0  2 - X v=0  2  2  1:: .00183 :  37:ND2H_b0x0.lin
    2 E-  1     1 E+  2    59333.9540    59333.6471        0.3069 1       :B B1  2  1  1 - X v=0  1  1  0::   .004 :  38:ND2H_b0x0.lin
    2 O+  1     1 O-  1    59326.0930    59326.3711       -0.2781 2       :B B1  2  1  2 - X v=0  1  1  1:: .01206 :  39:ND2H_b0x0.lin
    2 O+  1     2 O+  2    59304.5310    59304.9713       -0.4403 1       :B B1  2  1  2 - X v=0  2  1  1:: .00496 :  40:ND2H_b0x0.lin
    2 O-  2     1 O+  1    59345.5810    59345.0227        0.5583 1       :B B1  2  2  0 - X v=0  1  0  1:: .01638 :  41:ND2H_b0x0.lin
    2 E+  1     0 E+  1    59352.7190    59352.4339        0.2851 1       :B B1  2  2  1 - X v=0  0  0  0:: .04419 :  42:ND2H_b0x0.lin
    2 E+  1     2 E+  1    59326.0930    59325.7774        0.3156 2       :B B1  2  2  1 - X v=0  2  0  2:: .00475 :  43:ND2H_b0x0.lin
    3 E-  1     2 E+  1    59329.3940    59329.5966       -0.2026 1       :B B1  3  0  3 - X v=0  2  0  2:: .00725 :  44:ND2H_b0x0.lin
    3 E-  1     3 E-  2    59289.6710    59290.1006       -0.4296 1       :B B1  3  0  3 - X v=0  3  2  2:: .00074 :  45:ND2H_b0x0.lin
    3 O-  1     1 O-  1    59362.8770    59362.2741        0.6029 1       :B B1  3  1  2 - X v=0  1  1  1:: .01017 :  46:ND2H_b0x0.lin
    3 E+  1     2 E-  1    59328.4350    59328.6501       -0.2151 1       :B B1  3  1  3 - X v=0  2  1  2:: .00424 :  47:ND2H_b0x0.lin
    3 E-  2     2 E+  1    59356.9270    59356.4146        0.5124 1       :B B1  3  2  1 - X v=0  2  0  2:: .00777 :  48:ND2H_b0x0.lin
    3 O+  1     1 O+  1    59367.3530    59367.5191       -0.1661 1       :B B1  3  2  2 - X v=0  1  0  1:: .01409 :  49:ND2H_b0x0.lin
    3 O-  2     1 O-  1    59384.8260    59384.4098        0.4162 1       :B B1  3  3  0 - X v=0  1  1  1:: .02189 :  50:ND2H_b0x0.lin
    4 E-  1     2 E-  1    59378.8410    59378.5270        0.3140 1       :B B1  4  1  3 - X v=0  2  1  2:: .00359 :  51:ND2H_b0x0.lin
    4 O+  1     3 O-  1    59328.4350    59328.2864        0.1486 1       :B B1  4  1  4 - X v=0  3  1  3:: .00257 :  52:ND2H_b0x0.lin
    4 E-  2     2 E-  1    59405.1920    59405.3868       -0.1948 1       :B B1  4  3  1 - X v=0  2  1  2:: .00157 :  53:ND2H_b0x0.lin
    4 O+  2     2 O+  2    59395.9130    59396.6766       -0.7636 1       :B B1  4  3  2 - X v=0  2  1  1:: .00726 :  54:ND2H_b0x0.lin
    4 O-  4     2 O-  2    59413.4970    59413.3935        0.1035 1       :B B1  4  4  0 - X v=0  2  2  1:: .00286 :  55:ND2H_b0x0.lin
    4 E+  3     2 E+  3    59412.5760    59412.5029        0.0731 1       :B B1  4  4  1 - X v=0  2  2  0:: .00599 :  56:ND2H_b0x0.lin
    5 O-  1     3 O-  1    59392.1150    59391.4874        0.6276 1       :B B1  5  1  4 - X v=0  3  1  3:: .00175 :  57:ND2H_b0x0.lin
    5 O-  2     3 O-  1    59429.6650    59429.4542        0.2108 1       :B B1  5  3  2 - X v=0  3  1  3::  .0002 :  58:ND2H_b0x0.lin
    5 E-  4     3 E-  2    59430.4860    59431.6958       -1.2098 1       :B B1  5  4  1 - X v=0  3  2  2:: .00053 :  59:ND2H_b0x0.lin
    5 O-  4     3 O-  3    59443.2140    59443.1467        0.0673 1       :B B1  5  5  0 - X v=0  3  3  1:: .00038 :  60:ND2H_b0x0.lin
    5 E+  5     3 E+  3    59443.2140    59442.9343        0.2797 1       :B B1  5  5  1 - X v=0  3  3  0::  .0001 :  61:ND2H_b0x0.lin

55 Observations,  8 Parameters
Initial Average Error: 0.410940072517597  (Unweighted: 0.416908894052871)
Predicted New Error:   0.410940072517561  (Unweighted: 0.416908898971221)
Parameters:
  # Old                 New                 Std Dev   Change/Std Sens    Summary              Name
  1 59349.1788457683    59349.178845645     .16183284    0.0000  .007858 59349.18(16)         B A2 Origin
  2 8.43730916399015    8.43730919093619    .02914832    0.0000  .00185  8.437(29)            B A2 A
  3 5.20621754384586    5.20621747255181    .02905701    0.0000  .00149  5.206(29)            B A2 B
  4 3.89436731652269    3.89436744859909    .05121631    0.0000  .002509 3.894(51)            B A2 C
  5 59314.3437465916    59314.3437465917    .13983607    0.0000  .007136 59314.34(14)         B B1 Origin
  6 7.50736037403525    7.5073603739752     .01221703    0.0000  .000815 7.507(12)            B B1 A
  7 5.51047912805756    5.51047912818759    .01740599    0.0000  .001092 5.510(17)            B B1 B
  8 2.55025419982813    2.55025419973265    .01924386    0.0000  .001267 2.550(19)            B B1 C

Correlation Matrix
       1       2       3       4       5       6       7       8
  1   1.000
  2  -0.509   1.000
  3  -0.156  -0.204   1.000
  4  -0.445   0.137  -0.563   1.000
  5   0.000   0.000   0.000   0.000   1.000
  6   0.000   0.000   0.000   0.000  -0.476   1.000
  7   0.000   0.000   0.000   0.000  -0.333  -0.271   1.000
  8   0.000   0.000   0.000   0.000  -0.532   0.278  -0.208   1.000
