# Supplementary material for: Resonance enhanced multiphoton ionization spectroscopy of NHD2via the B1E′′-state
Source: Royal Society of Chemistry journal article supplement (doi:10.1039/c3cp00012e), 2013-01-01
Supplement: c3cp00012e_2.log [file c3cp00012e_2.log]

Pgopher 7.1.294 14 Dec 2012 14:26 32 bit Unicode (Delphi 23/23)
Mixture: ND2H_b0x0_fitIII.pgo
  Units               cm1
  PrintLevel          Detail
  Precision           4
  BasisOrder          boDiagonal
  QuantumNumberFormat J
  FitCycles           1
  FitDetails          False
  AutoReplot          True
  AllowComplex        True
  NoLineList          False
  ShowEstUnc          False
  ShowDerivatives     False
  SVDlimit            5
  SVDThresh    1E-15
  ScaleChanges 1
  Species: NH3
    Jmax 20
    Concentration 1
    AsymmetricMolecule: ND2H
      JAdjustSym     True
      BlockMatrix    True
      PointGroup     C2v
      Representation IIIl
      SReduction     True
      eeWt           2
      eoWt           1
      oeWt           1
      ooWt           2
      C2zAxis        b
      C2xAxis        c
      PseudoC2v      False
      FakeSym        False
      PhaseAdjust    False
      Abundance 1
      AsymmetricManifold: X
        Initial       True
        EigenSearch   True
        LimitSearch   True
        AutoQConverge True
        UsePopParams  False
        AsymmetricTop: X v=0
          Symmetry A1
          Kmin     all
          Kmax     all
          A      7.44571610800829
          B      5.34422284499232
          C      3.75295877523377
          DK     0.00021649109331
          DJK    -0.00048922453879
          DJ     0.00033360773205
          deltaK -5.270730259E-5
          deltaJ 0.00011290946885
          HK     -8.32558336073952E-8
          HKJ    1.92454444601138E-7
          HJK    -1.7011815220515E-7
          HJ     6.5600286048557E-8
          phiK   -4.38005615204636E-9
          phiJK  2.50100050882534E-8
          phiJ   -3.98168972616383E-8
          LKKJ   1.41721643978115E-10
          LJK    -1.27759418150539E-10
          LJJK   6.55713993979128E-11
          LJ     -2.02633416481745E-11
          llKJ   4.40553144268893E-12
          llJK   -1.1186874154119E-11
          llJ    1.46377911881959E-11
        <N  ,K-2|A|N,K> = (-sqrt((N*(N+1)+(-K+1)*(K-2))*(N*(N+1)-K*(K-1))))/4
        <N  ,K  |A|N,K> = (N*(N+1)-K^2)/2
        <N  ,K+2|A|N,K> = (-sqrt((N*(N+1)+(-K-1)*(K+2))*(N*(N+1)-K*(K+1))))/4
        <N  ,K-2|B|N,K> = sqrt((N*(N+1)+(-K+1)*(K-2))*(N*(N+1)-K*(K-1)))/4
        <N  ,K  |B|N,K> = (N*(N+1)-K^2)/2
        <N  ,K+2|B|N,K> = sqrt((N*(N+1)+(-K-1)*(K+2))*(N*(N+1)-K*(K+1)))/4
        <N  ,K  |C|N,K> = K^2
        <N  ,K  |DK|N,K> = -K^4
        <N  ,K  |DJK|N,K> = -N*(N+1)*K^2
        <N  ,K  |DJ|N,K> = -N^2*(N+1)^2
        <N  ,K-4|deltaK|N,K> = sqrt((N*(N+1)+(-K+1)*(K-2))*(N*(N+1)+(-K+2)*(K-3))*(N*(N+1)+(-K+3)*(K-4))*(N*(N+1)-K*(K-1)))
        <N  ,K+4|deltaK|N,K> = sqrt((N*(N+1)+(-K-1)*(K+2))*(N*(N+1)+(-K-2)*(K+3))*(N*(N+1)+(-K-3)*(K+4))*(N*(N+1)-K*(K+1)))
        <N  ,K-2|deltaJ|N,K> = N*(N+1)*sqrt((N*(N+1)+(-K+1)*(K-2))*(N*(N+1)-K*(K-1)))
        <N  ,K+2|deltaJ|N,K> = N*(N+1)*sqrt((N*(N+1)+(-K-1)*(K+2))*(N*(N+1)-K*(K+1)))
        <N  ,K  |HK|N,K> = K^6
        <N  ,K  |HKJ|N,K> = N*(N+1)*K^4
        <N  ,K  |HJK|N,K> = N^2*(N+1)^2*K^2
        <N  ,K  |HJ|N,K> = N^3*(N+1)^3
        <N  ,K-6|phiK|N,K> = sqrt((N*(N+1)+(-K+1)*(K-2))*(N*(N+1)+(-K+2)*(K-3))*(N*(N+1)+(-K+3)*(K-4))*(N*(N+1)+(-K+4)*(K-5))*(N*(N+1)+(-K+5)*(K-6))*(N*(N+1)-K*(K-1)))
        <N  ,K+6|phiK|N,K> = sqrt((N*(N+1)+(-K-1)*(K+2))*(N*(N+1)+(-K-2)*(K+3))*(N*(N+1)+(-K-3)*(K+4))*(N*(N+1)+(-K-4)*(K+5))*(N*(N+1)+(-K-5)*(K+6))*(N*(N+1)-K*(K+1)))
        <N  ,K-4|phiJK|N,K> = N*(N+1)*sqrt((N*(N+1)+(-K+1)*(K-2))*(N*(N+1)+(-K+2)*(K-3))*(N*(N+1)+(-K+3)*(K-4))*(N*(N+1)-K*(K-1)))
        <N  ,K+4|phiJK|N,K> = N*(N+1)*sqrt((N*(N+1)+(-K-1)*(K+2))*(N*(N+1)+(-K-2)*(K+3))*(N*(N+1)+(-K-3)*(K+4))*(N*(N+1)-K*(K+1)))
        <N  ,K-2|phiJ|N,K> = N^2*(N+1)^2*sqrt((N*(N+1)+(-K+1)*(K-2))*(N*(N+1)-K*(K-1)))
        <N  ,K+2|phiJ|N,K> = N^2*(N+1)^2*sqrt((N*(N+1)+(-K-1)*(K+2))*(N*(N+1)-K*(K+1)))
        <N  ,K  |LKKJ|N,K> = N*(N+1)*K^6
        <N  ,K  |LJK|N,K> = N^2*(N+1)^2*K^4
        <N  ,K  |LJJK|N,K> = N^3*(N+1)^3*K^2
        <N  ,K  |LJ|N,K> = N^4*(N+1)^4
        <N  ,K-6|llKJ|N,K> = N*(N+1)*sqrt((N*(N+1)+(-K+1)*(K-2))*(N*(N+1)+(-K+2)*(K-3))*(N*(N+1)+(-K+3)*(K-4))*(N*(N+1)+(-K+4)*(K-5))*(N*(N+1)+(-K+5)*(K-6))*(N*(N+1)-K*(K-1)))
        <N  ,K+6|llKJ|N,K> = N*(N+1)*sqrt((N*(N+1)+(-K-1)*(K+2))*(N*(N+1)+(-K-2)*(K+3))*(N*(N+1)+(-K-3)*(K+4))*(N*(N+1)+(-K-4)*(K+5))*(N*(N+1)+(-K-5)*(K+6))*(N*(N+1)-K*(K+1)))
        <N  ,K-4|llJK|N,K> = N^2*(N+1)^2*sqrt((N*(N+1)+(-K+1)*(K-2))*(N*(N+1)+(-K+2)*(K-3))*(N*(N+1)+(-K+3)*(K-4))*(N*(N+1)-K*(K-1)))
        <N  ,K+4|llJK|N,K> = N^2*(N+1)^2*sqrt((N*(N+1)+(-K-1)*(K+2))*(N*(N+1)+(-K-2)*(K+3))*(N*(N+1)+(-K-3)*(K+4))*(N*(N+1)-K*(K+1)))
        <N  ,K-2|llJ|N,K> = N^3*(N+1)^3*sqrt((N*(N+1)+(-K+1)*(K-2))*(N*(N+1)-K*(K-1)))
        <N  ,K+2|llJ|N,K> = N^3*(N+1)^3*sqrt((N*(N+1)+(-K-1)*(K+2))*(N*(N+1)-K*(K+1)))
        AsymmetricTop: X v=1
          Symmetry B1
          Kmin     all
          Kmax     all
          Origin 0.17074620102684
          A      7.44463850424816
          B      5.34386570325261
          C      3.753232634358
          DK     0.00021428221853
          DJK    -0.00048566602699
          DJ     0.00033205133866
          deltaK -5.246157393E-5
          deltaJ 0.00011210335985
          HK     -7.52335604119834E-8
          HKJ    1.77525710136444E-7
          HJK    -1.60856561641721E-7
          HJ     6.33245416734266E-8
          phiK   -3.95551445126748E-9
          phiJK  2.39341247870885E-8
          phiJ   -3.82401127649449E-8
          LKKJ   1.29665336677683E-10
          LJK    -1.06206474346996E-10
          LJJK   5.4187470586735E-11
          LJ     -1.84466615234196E-11
          llKJ   2.85383596941588E-12
          llJK   -9.62525081268055E-12
          llJ    1.35698300322152E-11
        <N  ,K-2|A|N,K> = (-sqrt((N*(N+1)+(-K+1)*(K-2))*(N*(N+1)-K*(K-1))))/4
        <N  ,K  |A|N,K> = (N*(N+1)-K^2)/2
        <N  ,K+2|A|N,K> = (-sqrt((N*(N+1)+(-K-1)*(K+2))*(N*(N+1)-K*(K+1))))/4
        <N  ,K-2|B|N,K> = sqrt((N*(N+1)+(-K+1)*(K-2))*(N*(N+1)-K*(K-1)))/4
        <N  ,K  |B|N,K> = (N*(N+1)-K^2)/2
        <N  ,K+2|B|N,K> = sqrt((N*(N+1)+(-K-1)*(K+2))*(N*(N+1)-K*(K+1)))/4
        <N  ,K  |C|N,K> = K^2
        <N  ,K  |DK|N,K> = -K^4
        <N  ,K  |DJK|N,K> = -N*(N+1)*K^2
        <N  ,K  |DJ|N,K> = -N^2*(N+1)^2
        <N  ,K-4|deltaK|N,K> = sqrt((N*(N+1)+(-K+1)*(K-2))*(N*(N+1)+(-K+2)*(K-3))*(N*(N+1)+(-K+3)*(K-4))*(N*(N+1)-K*(K-1)))
        <N  ,K+4|deltaK|N,K> = sqrt((N*(N+1)+(-K-1)*(K+2))*(N*(N+1)+(-K-2)*(K+3))*(N*(N+1)+(-K-3)*(K+4))*(N*(N+1)-K*(K+1)))
        <N  ,K-2|deltaJ|N,K> = N*(N+1)*sqrt((N*(N+1)+(-K+1)*(K-2))*(N*(N+1)-K*(K-1)))
        <N  ,K+2|deltaJ|N,K> = N*(N+1)*sqrt((N*(N+1)+(-K-1)*(K+2))*(N*(N+1)-K*(K+1)))
        <N  ,K  |HK|N,K> = K^6
        <N  ,K  |HKJ|N,K> = N*(N+1)*K^4
        <N  ,K  |HJK|N,K> = N^2*(N+1)^2*K^2
        <N  ,K  |HJ|N,K> = N^3*(N+1)^3
        <N  ,K-6|phiK|N,K> = sqrt((N*(N+1)+(-K+1)*(K-2))*(N*(N+1)+(-K+2)*(K-3))*(N*(N+1)+(-K+3)*(K-4))*(N*(N+1)+(-K+4)*(K-5))*(N*(N+1)+(-K+5)*(K-6))*(N*(N+1)-K*(K-1)))
        <N  ,K+6|phiK|N,K> = sqrt((N*(N+1)+(-K-1)*(K+2))*(N*(N+1)+(-K-2)*(K+3))*(N*(N+1)+(-K-3)*(K+4))*(N*(N+1)+(-K-4)*(K+5))*(N*(N+1)+(-K-5)*(K+6))*(N*(N+1)-K*(K+1)))
        <N  ,K-4|phiJK|N,K> = N*(N+1)*sqrt((N*(N+1)+(-K+1)*(K-2))*(N*(N+1)+(-K+2)*(K-3))*(N*(N+1)+(-K+3)*(K-4))*(N*(N+1)-K*(K-1)))
        <N  ,K+4|phiJK|N,K> = N*(N+1)*sqrt((N*(N+1)+(-K-1)*(K+2))*(N*(N+1)+(-K-2)*(K+3))*(N*(N+1)+(-K-3)*(K+4))*(N*(N+1)-K*(K+1)))
        <N  ,K-2|phiJ|N,K> = N^2*(N+1)^2*sqrt((N*(N+1)+(-K+1)*(K-2))*(N*(N+1)-K*(K-1)))
        <N  ,K+2|phiJ|N,K> = N^2*(N+1)^2*sqrt((N*(N+1)+(-K-1)*(K+2))*(N*(N+1)-K*(K+1)))
        <N  ,K  |LKKJ|N,K> = N*(N+1)*K^6
        <N  ,K  |LJK|N,K> = N^2*(N+1)^2*K^4
        <N  ,K  |LJJK|N,K> = N^3*(N+1)^3*K^2
        <N  ,K  |LJ|N,K> = N^4*(N+1)^4
        <N  ,K-6|llKJ|N,K> = N*(N+1)*sqrt((N*(N+1)+(-K+1)*(K-2))*(N*(N+1)+(-K+2)*(K-3))*(N*(N+1)+(-K+3)*(K-4))*(N*(N+1)+(-K+4)*(K-5))*(N*(N+1)+(-K+5)*(K-6))*(N*(N+1)-K*(K-1)))
        <N  ,K+6|llKJ|N,K> = N*(N+1)*sqrt((N*(N+1)+(-K-1)*(K+2))*(N*(N+1)+(-K-2)*(K+3))*(N*(N+1)+(-K-3)*(K+4))*(N*(N+1)+(-K-4)*(K+5))*(N*(N+1)+(-K-5)*(K+6))*(N*(N+1)-K*(K+1)))
        <N  ,K-4|llJK|N,K> = N^2*(N+1)^2*sqrt((N*(N+1)+(-K+1)*(K-2))*(N*(N+1)+(-K+2)*(K-3))*(N*(N+1)+(-K+3)*(K-4))*(N*(N+1)-K*(K-1)))
        <N  ,K+4|llJK|N,K> = N^2*(N+1)^2*sqrt((N*(N+1)+(-K-1)*(K+2))*(N*(N+1)+(-K-2)*(K+3))*(N*(N+1)+(-K-3)*(K+4))*(N*(N+1)-K*(K+1)))
        <N  ,K-2|llJ|N,K> = N^3*(N+1)^3*sqrt((N*(N+1)+(-K+1)*(K-2))*(N*(N+1)-K*(K-1)))
        <N  ,K+2|llJ|N,K> = N^3*(N+1)^3*sqrt((N*(N+1)+(-K-1)*(K+2))*(N*(N+1)-K*(K+1)))
        AsymmetricTopPerturbation: X <v=1|bc|v=0>
          Value 0.10395943649789
        <N  ,K-1|bc|N,K> = (sqrt(N*(N+1)-K*(K-1))*(2*K-1))/2
        <N  ,K+1|bc|N,K> = (sqrt(N*(N+1)-K*(K+1))*(2*K+1))/2

        AsymmetricTopPerturbation: X <v=1|J^2bc|v=0>
          Value -1.839105638E-5
        <N  ,K-1|J^2bc|N,K> = (N*(N+1)*sqrt(N*(N+1)-K*(K-1))*(2*K-1))/2
        <N  ,K+1|J^2bc|N,K> = (N*(N+1)*sqrt(N*(N+1)-K*(K+1))*(2*K+1))/2

      AsymmetricManifold: B
        Initial       True
        EigenSearch   True
        LimitSearch   True
        AutoQConverge True
        UsePopParams  False
        AsymmetricTop: B A2
          Colour   Navy
          Symmetry A2
          Kmin     all
          Kmax     all
          Origin 59349.390045354            Float, Increment = 0.1
          A      8.37717135494511           Float, Increment = 0.001
          B      5.11220649105662           Float, Increment = 0.001
          C      3.16685040878121           Float, Increment = 0.001
        <N  ,K-2|A|N,K> = (-sqrt((N*(N+1)+(-K+1)*(K-2))*(N*(N+1)-K*(K-1))))/4
        <N  ,K  |A|N,K> = (N*(N+1)-K^2)/2
        <N  ,K+2|A|N,K> = (-sqrt((N*(N+1)+(-K-1)*(K+2))*(N*(N+1)-K*(K+1))))/4
        <N  ,K-2|B|N,K> = sqrt((N*(N+1)+(-K+1)*(K-2))*(N*(N+1)-K*(K-1)))/4
        <N  ,K  |B|N,K> = (N*(N+1)-K^2)/2
        <N  ,K+2|B|N,K> = sqrt((N*(N+1)+(-K-1)*(K+2))*(N*(N+1)-K*(K+1)))/4
        <N  ,K  |C|N,K> = K^2
        AsymmetricTop: B B1
          Colour   Maroon
          Symmetry B1
          Kmin     all
          Kmax     all
          Origin 59314.2819584241           Float, Increment = 0.1
          A      7.6531312498867            Float, Increment = 0.001
          B      5.55587921997455           Float, Increment = 0.001
          C      3.16685040878121           Float, Increment = 0.001
        <N  ,K-2|A|N,K> = (-sqrt((N*(N+1)+(-K+1)*(K-2))*(N*(N+1)-K*(K-1))))/4
        <N  ,K  |A|N,K> = (N*(N+1)-K^2)/2
        <N  ,K+2|A|N,K> = (-sqrt((N*(N+1)+(-K-1)*(K+2))*(N*(N+1)-K*(K+1))))/4
        <N  ,K-2|B|N,K> = sqrt((N*(N+1)+(-K+1)*(K-2))*(N*(N+1)-K*(K-1)))/4
        <N  ,K  |B|N,K> = (N*(N+1)-K^2)/2
        <N  ,K+2|B|N,K> = sqrt((N*(N+1)+(-K-1)*(K+2))*(N*(N+1)-K*(K+1)))/4
        <N  ,K  |C|N,K> = K^2
        AsymmetricTopPerturbation: B <A2|c|B1>
          Value -5.26366226710798          Float
        <N  ,K  |c|N,K> = K

        AsymmetricTopPerturbation: B <A2|ab|B1>
          Value 0.480880664559293          Float
        <N  ,K-2|ab|N,K> = (-sqrt((-N*(N+1)+(K-1)*(K-2))*(N*(N+1)-K*(K-1))))/2
        <N  ,K+2|ab|N,K> = sqrt((-N*(N+1)+(K+1)*(K+2))*(N*(N+1)-K*(K+1)))/2

      TransitionMoments: <B|mu|X>
        SphericalTransitionMoment: <A2|T(2,1)|v=0>
          Rank      2
          Component 1
          Strength 1
        Reduced Matrix Elements of <A2|T(2,1)|v=0>
        <N-2,K-1|T(2,1)|N,K> = -1^(2*N-2*K-5)*sqrt(((N-K)*(N+K)*(N+K-1)*(N+K-2))/(N*(2*N-1)*(N-1)))
        <N-2,K+1|T(2,1)|N,K> = -1^(2*N-2*K-7)*sqrt(((N-K)*(N-K-1)*(N-K-2)*(N+K))/(N*(2*N-1)*(N-1)))
        <N-1,K-1|T(2,1)|N,K> = -1^(2*N-2*K-3)*(N-2*K+1)*sqrt(((N+K)*(N+K-1))/(2*N*(N-1)*(N+1)))
        <N-1,K+1|T(2,1)|N,K> = -1^(2*N-2*K-5)*(-N-2*K-1)*sqrt(((N-K)*(N-K-1))/(2*N*(N-1)*(N+1)))
        <N  ,K-1|T(2,1)|N,K> = (-1^(2*N-2*K-1)*(2*N+1)*sqrt((6*(N-K+1)*(N+K))/(N*(2*N-1)*(2*N+1)*(2*N+3)*(N+1)))*(-2*K+1))/2
        <N  ,K+1|T(2,1)|N,K> = (-1^(2*N-2*K-3)*(2*N+1)*sqrt((6*(N-K)*(N+K+1))/(N*(2*N-1)*(2*N+1)*(2*N+3)*(N+1)))*(2*K+1))/2
        <N+1,K-1|T(2,1)|N,K> = -1^(2*N-2*K+1)*(-N-2*K)*sqrt(((N-K+1)*(N-K+2))/(2*N*(N+1)*(N+2)))
        <N+1,K+1|T(2,1)|N,K> = -1^(2*N-2*K-1)*(N-2*K)*sqrt(((N+K+1)*(N+K+2))/(2*N*(N+1)*(N+2)))
        <N+2,K-1|T(2,1)|N,K> = -1^(2*(N-K+2))*sqrt(((N-K+1)*(N-K+2)*(N-K+3)*(N+K+1))/((2*N+3)*(N+1)*(N+2)))
        <N+2,K+1|T(2,1)|N,K> = -1^(2*(N-K+1))*sqrt(((N-K+1)*(N+K+1)*(N+K+2)*(N+K+3))/((2*N+3)*(N+1)*(N+2)))
        Line Strengths from <A2|T(2,1)|v=0>
        <N-2,K-1|T(2,1)|N,K> = (-1^(2*(2*N-2*K-5))*(N-K)*(N+K)*(N+K-1)*(N+K-2))/(N*(2*N-1)*(N-1))
        <N-2,K+1|T(2,1)|N,K> = (-1^(2*(2*N-2*K-7))*(N-K)*(N-K-1)*(N-K-2)*(N+K))/(N*(2*N-1)*(N-1))
        <N-1,K-1|T(2,1)|N,K> = (-1^(2*(2*N-2*K-3))*(N-2*K+1)^2*(N+K)*(N+K-1))/(2*N*(N-1)*(N+1))
        <N-1,K+1|T(2,1)|N,K> = (-1^(2*(2*N-2*K-5))*(-N-2*K-1)^2*(N-K)*(N-K-1))/(2*N*(N-1)*(N+1))
        <N  ,K-1|T(2,1)|N,K> = (3*-1^(2*(2*N-2*K-1))*(2*N+1)*(N-K+1)*(N+K)*(-2*K+1)^2)/(2*N*(2*N-1)*(2*N+3)*(N+1))
        <N  ,K+1|T(2,1)|N,K> = (3*-1^(2*(2*N-2*K-3))*(2*N+1)*(N-K)*(N+K+1)*(2*K+1)^2)/(2*N*(2*N-1)*(2*N+3)*(N+1))
        <N+1,K-1|T(2,1)|N,K> = (-1^(2*(2*N-2*K+1))*(-N-2*K)^2*(N-K+1)*(N-K+2))/(2*N*(N+1)*(N+2))
        <N+1,K+1|T(2,1)|N,K> = (-1^(2*(2*N-2*K-1))*(N-2*K)^2*(N+K+1)*(N+K+2))/(2*N*(N+1)*(N+2))
        <N+2,K-1|T(2,1)|N,K> = (-1^(4*(N-K+2))*(N-K+1)*(N-K+2)*(N-K+3)*(N+K+1))/((2*N+3)*(N+1)*(N+2))
        <N+2,K+1|T(2,1)|N,K> = (-1^(4*(N-K+1))*(N-K+1)*(N+K+1)*(N+K+2)*(N+K+3))/((2*N+3)*(N+1)*(N+2))

        SphericalTransitionMoment: <B1|T(2,-1)|v=0>
          Rank      2
          Component -1
          Strength 1
        Reduced Matrix Elements of <B1|T(2,-1)|v=0>
        <N-2,K-1|T(2,-1)|N,K> = -1^(2*(N-K-2))*sqrt(((N-K)*(N+K)*(N+K-1)*(N+K-2))/(N*(2*N-1)*(N-1)))
        <N-2,K+1|T(2,-1)|N,K> = -1^(2*N-2*K-7)*sqrt(((N-K)*(N-K-1)*(N-K-2)*(N+K))/(N*(2*N-1)*(N-1)))
        <N-1,K-1|T(2,-1)|N,K> = -1^(2*(N-K-1))*(N-2*K+1)*sqrt(((N+K)*(N+K-1))/(2*N*(N-1)*(N+1)))
        <N-1,K+1|T(2,-1)|N,K> = -1^(2*N-2*K-5)*(-N-2*K-1)*sqrt(((N-K)*(N-K-1))/(2*N*(N-1)*(N+1)))
        <N  ,K-1|T(2,-1)|N,K> = (-1^(2*(N-K))*(2*N+1)*sqrt((6*(N-K+1)*(N+K))/(N*(2*N-1)*(2*N+1)*(2*N+3)*(N+1)))*(-2*K+1))/2
        <N  ,K+1|T(2,-1)|N,K> = (-1^(2*N-2*K-3)*(2*N+1)*sqrt((6*(N-K)*(N+K+1))/(N*(2*N-1)*(2*N+1)*(2*N+3)*(N+1)))*(2*K+1))/2
        <N+1,K-1|T(2,-1)|N,K> = -1^(2*(N-K+1))*(-N-2*K)*sqrt(((N-K+1)*(N-K+2))/(2*N*(N+1)*(N+2)))
        <N+1,K+1|T(2,-1)|N,K> = -1^(2*N-2*K-1)*(N-2*K)*sqrt(((N+K+1)*(N+K+2))/(2*N*(N+1)*(N+2)))
        <N+2,K-1|T(2,-1)|N,K> = -1^(2*N-2*K+5)*sqrt(((N-K+1)*(N-K+2)*(N-K+3)*(N+K+1))/((2*N+3)*(N+1)*(N+2)))
        <N+2,K+1|T(2,-1)|N,K> = -1^(2*(N-K+1))*sqrt(((N-K+1)*(N+K+1)*(N+K+2)*(N+K+3))/((2*N+3)*(N+1)*(N+2)))
        Line Strengths from <B1|T(2,-1)|v=0>
        <N-2,K-1|T(2,-1)|N,K> = (-1^(4*(N-K-2))*(N-K)*(N+K)*(N+K-1)*(N+K-2))/(N*(2*N-1)*(N-1))
        <N-2,K+1|T(2,-1)|N,K> = (-1^(2*(2*N-2*K-7))*(N-K)*(N-K-1)*(N-K-2)*(N+K))/(N*(2*N-1)*(N-1))
        <N-1,K-1|T(2,-1)|N,K> = (-1^(4*(N-K-1))*(N-2*K+1)^2*(N+K)*(N+K-1))/(2*N*(N-1)*(N+1))
        <N-1,K+1|T(2,-1)|N,K> = (-1^(2*(2*N-2*K-5))*(-N-2*K-1)^2*(N-K)*(N-K-1))/(2*N*(N-1)*(N+1))
        <N  ,K-1|T(2,-1)|N,K> = (3*-1^(4*(N-K))*(2*N+1)*(N-K+1)*(N+K)*(-2*K+1)^2)/(2*N*(2*N-1)*(2*N+3)*(N+1))
        <N  ,K+1|T(2,-1)|N,K> = (3*-1^(2*(2*N-2*K-3))*(2*N+1)*(N-K)*(N+K+1)*(2*K+1)^2)/(2*N*(2*N-1)*(2*N+3)*(N+1))
        <N+1,K-1|T(2,-1)|N,K> = (-1^(4*(N-K+1))*(-N-2*K)^2*(N-K+1)*(N-K+2))/(2*N*(N+1)*(N+2))
        <N+1,K+1|T(2,-1)|N,K> = (-1^(2*(2*N-2*K-1))*(N-2*K)^2*(N+K+1)*(N+K+2))/(2*N*(N+1)*(N+2))
        <N+2,K-1|T(2,-1)|N,K> = (-1^(2*(2*N-2*K+5))*(N-K+1)*(N-K+2)*(N-K+3)*(N+K+1))/((2*N+3)*(N+1)*(N+2))
        <N+2,K+1|T(2,-1)|N,K> = (-1^(4*(N-K+1))*(N-K+1)*(N+K+1)*(N+K+2)*(N+K+3))/((2*N+3)*(N+1)*(N+2))


Residuals before fit for ND2H for the B - X Transition
    J' S' #'    J" S" #"     Observed    Calculated      Obs-Calc StdDev 
    1 E+  2     2 E-  1    59330.6450    59330.7257       -0.0807 1       :B A2  1  0  1 - X v=0  2  1  2:: .00144 :   5:ND2H_b0x0.lin
    1 O+  1     1 O+  1    59354.0270    59353.7824        0.2446 1       :B A2  1  1  0 - X v=0  1  0  1:: .00764 :   6:ND2H_b0x0.lin
    1 O+  1     2 O-  2    59323.9090    59324.0105       -0.1015 1       :B A2  1  1  0 - X v=0  2  2  1:: .00049 :   7:ND2H_b0x0.lin
    1 E-  2     2 E+  1    59335.0980    59335.0003        0.0977 1       :B A2  1  1  1 - X v=0  2  0  2:: .00551 :   8:ND2H_b0x0.lin
    1 E-  2     2 E+  3    59322.0340    59322.1550       -0.1210 1       :B A2  1  1  1 - X v=0  2  2  0::  .0011 :   9:ND2H_b0x0.lin
    2 O+  2     1 O-  1    59365.2080    59365.0691        0.1389 1       :B A2  2  0  2 - X v=0  1  1  1:: .01143 :  10:ND2H_b0x0.lin
    2 O+  2     3 O-  1    59323.9090    59323.9441       -0.0351 1       :B A2  2  0  2 - X v=0  3  1  3:: .00128 :  11:ND2H_b0x0.lin
    2 E+  2     0 E+  1    59382.5930    59382.4172        0.1758 2       :B A2  2  1  1 - X v=0  0  0  0:: .02104 :  12:ND2H_b0x0.lin
    2 E+  2     0 E+  1    59382.5930    59382.4172        0.1758 2       :B A2  2  1  1 - X v=0  0  0  0:: .02085 :  13:ND2H_b0x0.lin
    2 E+  2     2 E+  1    59356.0780    59355.7606        0.3174 1       :B A2  2  1  1 - X v=0  2  0  2:: .00489 :  14:ND2H_b0x0.lin
    2 O-  3     1 O+  1    59369.3650    59369.4885       -0.1235 1       :B A2  2  1  2 - X v=0  1  0  1:: .00173 :  15:ND2H_b0x0.lin
    2 O+  3     1 O-  1    59380.7990    59380.9406       -0.1416 1       :B A2  2  2  0 - X v=0  1  1  1:: .01268 :  16:ND2H_b0x0.lin
    2 O+  3     1 O-  1    59380.7770    59380.9406       -0.1636 1       :B A2  2  2  0 - X v=0  1  1  1:: .01289 :  17:ND2H_b0x0.lin
    2 O+  3     2 O+  2    59359.4480    59359.5408       -0.0928 1       :B A2  2  2  0 - X v=0  2  1  1:: .00226 :  18:ND2H_b0x0.lin
    3 E+  3     1 E+  2    59389.2800    59389.0660        0.2140 1       :B A2  3  0  3 - X v=0  1  1  0:: .00129 :  19:ND2H_b0x0.lin
    3 O+  2     1 O+  1    59401.9640    59402.1626       -0.1986 1       :B A2  3  1  2 - X v=0  1  0  1:: .00761 :  20:ND2H_b0x0.lin
    3 E+  4     1 E+  2    59408.1720    59408.1935       -0.0215 1       :B A2  3  2  1 - X v=0  1  1  0:: .00515 :  21:ND2H_b0x0.lin
    3 E+  4     2 E-  1    59393.0810    59393.2099       -0.1289 1       :B A2  3  2  1 - X v=0  2  1  2:: .00117 :  22:ND2H_b0x0.lin
    3 O-  3     1 O-  1    59408.1720    59408.3688       -0.1968 1       :B A2  3  2  2 - X v=0  1  1  1:: .00583 :  23:ND2H_b0x0.lin
    3 O+  3     2 O-  2    59399.6890    59399.5218        0.1672 1       :B A2  3  3  0 - X v=0  2  2  1:: .00141 :  24:ND2H_b0x0.lin
    3 E-  4     2 E+  3    59398.9830    59398.8493        0.1337 1       :B A2  3  3  1 - X v=0  2  2  0:: .00212 :  25:ND2H_b0x0.lin
    4 E+  2     2 E+  1    59422.1370    59422.1784       -0.0414 1       :B A2  4  1  3 - X v=0  2  0  2:: .00402 :  26:ND2H_b0x0.lin
    4 O+  4     2 O+  2    59427.1020    59426.9270        0.1750 1       :B A2  4  2  2 - X v=0  2  1  1:: .00377 :  27:ND2H_b0x0.lin
    4 E+  4     2 E+  3    59437.5020    59437.4051        0.0969 1       :B A2  4  3  1 - X v=0  2  2  0:: .00123 :  28:ND2H_b0x0.lin
    4 O-  5     2 O-  2    59437.5020    59437.7266       -0.2246 1       :B A2  4  3  2 - X v=0  2  2  1:: .00053 :  29:ND2H_b0x0.lin
    1 E-  1     2 E+  3    59282.5210    59282.7801       -0.2591 1       :B B1  1  0  1 - X v=0  2  2  0:: .00414 :  32:ND2H_b0x0.lin
    1 O-  1     1 O-  1    59316.4490    59316.2994        0.1496 1       :B B1  1  1  0 - X v=0  1  1  1::  .0131 :  33:ND2H_b0x0.lin
    1 O-  1     2 O+  2    59294.8240    59294.8996       -0.0756 1       :B B1  1  1  0 - X v=0  2  1  1:: .00156 :  34:ND2H_b0x0.lin
    1 E+  1     1 E+  2    59311.3850    59311.4694       -0.0844 1       :B B1  1  1  1 - X v=0  1  1  0:: .00766 :  35:ND2H_b0x0.lin
    1 E+  1     2 E-  1    59296.4030    59296.4858       -0.0828 1       :B B1  1  1  1 - X v=0  2  1  2:: .00076 :  36:ND2H_b0x0.lin
    2 O-  1     2 O-  2    59297.5650    59297.6735       -0.1085 1       :B B1  2  0  2 - X v=0  2  2  1:: .00183 :  37:ND2H_b0x0.lin
    2 E-  1     1 E+  2    59333.9540    59333.8602        0.0938 1       :B B1  2  1  1 - X v=0  1  1  0::   .004 :  38:ND2H_b0x0.lin
    2 O+  1     1 O-  1    59326.0930    59325.9791        0.1139 2       :B B1  2  1  2 - X v=0  1  1  1:: .01206 :  39:ND2H_b0x0.lin
    2 O+  1     2 O+  2    59304.5310    59304.5793       -0.0483 1       :B B1  2  1  2 - X v=0  2  1  1:: .00496 :  40:ND2H_b0x0.lin
    2 O-  2     1 O+  1    59345.5810    59345.3891        0.1919 1       :B B1  2  2  0 - X v=0  1  0  1:: .01638 :  41:ND2H_b0x0.lin
    2 E+  1     0 E+  1    59352.7190    59352.5829        0.1361 1       :B B1  2  2  1 - X v=0  0  0  0:: .04419 :  42:ND2H_b0x0.lin
    2 E+  1     2 E+  1    59326.0930    59325.9264        0.1666 2       :B B1  2  2  1 - X v=0  2  0  2:: .00475 :  43:ND2H_b0x0.lin
    3 E-  1     2 E+  1    59329.3940    59329.2605        0.1335 1       :B B1  3  0  3 - X v=0  2  0  2:: .00725 :  44:ND2H_b0x0.lin
    3 E-  1     3 E-  2    59289.6710    59289.7645       -0.0935 1       :B B1  3  0  3 - X v=0  3  2  2:: .00074 :  45:ND2H_b0x0.lin
    3 O-  1     1 O-  1    59362.8770    59362.5409        0.3361 1       :B B1  3  1  2 - X v=0  1  1  1:: .01017 :  46:ND2H_b0x0.lin
    3 E+  1     2 E-  1    59328.4350    59328.2509        0.1841 1       :B B1  3  1  3 - X v=0  2  1  2:: .00424 :  47:ND2H_b0x0.lin
    3 E-  2     2 E+  1    59356.9270    59356.8326        0.0944 1       :B B1  3  2  1 - X v=0  2  0  2:: .00777 :  48:ND2H_b0x0.lin
    3 O+  1     1 O+  1    59367.3530    59367.3792       -0.0262 1       :B B1  3  2  2 - X v=0  1  0  1:: .01409 :  49:ND2H_b0x0.lin
    3 O-  2     1 O-  1    59384.8260    59384.8520       -0.0260 1       :B B1  3  3  0 - X v=0  1  1  1:: .02189 :  50:ND2H_b0x0.lin
    4 E-  1     2 E-  1    59378.8410    59378.8267        0.0143 1       :B B1  4  1  3 - X v=0  2  1  2:: .00359 :  51:ND2H_b0x0.lin
    4 O+  1     3 O-  1    59328.4350    59328.4326        0.0024 1       :B B1  4  1  4 - X v=0  3  1  3:: .00257 :  52:ND2H_b0x0.lin
    4 E-  2     2 E-  1    59405.1920    59405.4783       -0.2863 1       :B B1  4  3  1 - X v=0  2  1  2:: .00157 :  53:ND2H_b0x0.lin
    4 O+  2     2 O+  2    59395.9130    59396.2433       -0.3303 1       :B B1  4  3  2 - X v=0  2  1  1:: .00726 :  54:ND2H_b0x0.lin
    4 O-  4     2 O-  2    59413.4970    59413.6648       -0.1678 1       :B B1  4  4  0 - X v=0  2  2  1:: .00286 :  55:ND2H_b0x0.lin
    4 E+  3     2 E+  3    59412.5760    59412.7401       -0.1641 1       :B B1  4  4  1 - X v=0  2  2  0:: .00599 :  56:ND2H_b0x0.lin
    5 O-  1     3 O-  1    59392.1150    59392.2046       -0.0896 1       :B B1  5  1  4 - X v=0  3  1  3:: .00175 :  57:ND2H_b0x0.lin
    5 O-  2     3 O-  1    59429.6650    59429.4338        0.2312 1       :B B1  5  3  2 - X v=0  3  1  3::  .0002 :  58:ND2H_b0x0.lin
    5 E-  4     3 E-  2    59430.4860    59430.7038       -0.2178 1       :B B1  5  4  1 - X v=0  3  2  2:: .00053 :  59:ND2H_b0x0.lin
    5 O-  4     3 O-  3    59443.2140    59443.1159        0.0981 1       :B B1  5  5  0 - X v=0  3  3  1:: .00038 :  60:ND2H_b0x0.lin
    5 E+  5     3 E+  3    59443.2140    59442.8908        0.3232 1       :B B1  5  5  1 - X v=0  3  3  0::  .0001 :  61:ND2H_b0x0.lin

55 Observations,  9 Parameters
Initial Average Error: 0.176805878314845  (Unweighted: 0.181473333415454)
Predicted New Error:   0.17680587824803  (Unweighted: 0.181473143747892)
Parameters:
  # Old                 New                 Std Dev   Change/Std Sens    Summary              Name
  1 59349.390045354     59349.3900498084    .07665193    0.0001  .00316  59349.390(77)        B A2 Origin
  2 8.37717135494511    8.37717033087455    .01629346   -0.0001  .000744 8.377(16)            B A2 A
  3 5.11220649105662    5.1122080245699     .01469595    0.0001  .000615 5.112(15)            B A2 B
  4 3.16685040878121    3.16684871023966    .01165297   -0.0001  .00043  3.167(12)            B A2 C
  5 59314.2819584241    59314.281955429     .0692533     0.0000  .002964 59314.282(69)        B B1 Origin
  6 7.6531312498867     7.65313199200593    .01136699    0.0001  .000367 7.653(11)            B B1 A
  7 5.55587921997455    5.55587982686056    .01105742    0.0001  .000454 5.556(11)            B B1 B
  8 -5.26366226710798   -5.2636540526739    .05044088    0.0002  .001993 -5.264(50)           B <A2|c|B1> Value
  9 .480880664559293    .480882477045909    .02169558    0.0001  .000661 0.481(22)            B <A2|ab|B1> Value
Constraints:
NH3.ND2H.B.B1.C := NH3.ND2H.B.A2.C

Correlation Matrix
       1       2       3       4       5       6       7       8       9
  1   1.000
  2  -0.610   1.000
  3  -0.201  -0.024   1.000
  4  -0.426   0.233  -0.491   1.000
  5  -0.229   0.284   0.083  -0.045   1.000
  6   0.327  -0.552  -0.292  -0.056  -0.548   1.000
  7   0.302  -0.391  -0.163  -0.260  -0.522   0.477   1.000
  8   0.416  -0.223   0.519  -0.742  -0.275   0.098   0.159   1.000
  9   0.324  -0.542  -0.287  -0.154  -0.400   0.837   0.685   0.122   1.000
