# Supplementary material for: Resonance enhanced multiphoton ionization spectroscopy of NHD2via the B1E′′-state
Source: Royal Society of Chemistry journal article supplement (doi:10.1039/c3cp00012e), 2013-01-01
Supplement: c3cp00012e_2.pgo [file c3cp00012e_2.pgo]

<?xml version="1.0"?>
<Mixture BasisOrder="boDiagonal" AllowComplex="True" PrintLevel="plDetail" Version="Pgopher 7.1.294 14 Dec 2012 9:42 32 bit Unicode (Delphi 23/23)">
  <Species Name="NH3" Jmax="40">
    <AsymmetricMolecule Name="ND2H" SReduction="True" C2zAxis="b" PointGroup="C2v" Representation="IIIl" eeWt="2" ooWt="2">
      <AsymmetricManifold Name="X" Initial="True">
        <AsymmetricTop Name="v=0">
          <Parameter Name="A" Value="7.44571610800829"/>
          <Parameter Name="B" Value="5.34422284499232"/>
          <Parameter Name="C" Value="3.75295877523377"/>
          <Parameter Name="DK" Value="0.00021649109331"/>
          <Parameter Name="DJK" Value="-0.00048922453879"/>
          <Parameter Name="DJ" Value="0.00033360773205"/>
          <Parameter Name="deltaK" Value="-5.270730259E-5"/>
          <Parameter Name="deltaJ" Value="0.00011290946885"/>
          <Parameter Name="HK" Value="-8.32558336073952E-8"/>
          <Parameter Name="HKJ" Value="1.92454444601138E-7"/>
          <Parameter Name="HJK" Value="-1.7011815220515E-7"/>
          <Parameter Name="HJ" Value="6.5600286048557E-8"/>
          <Parameter Name="phiK" Value="-4.38005615204636E-9"/>
          <Parameter Name="phiJK" Value="2.50100050882534E-8"/>
          <Parameter Name="phiJ" Value="-3.98168972616383E-8"/>
          <Parameter Name="LKKJ" Value="1.41721643978115E-10"/>
          <Parameter Name="LJK" Value="-1.27759418150539E-10"/>
          <Parameter Name="LJJK" Value="6.55713993979128E-11"/>
          <Parameter Name="LJ" Value="-2.02633416481745E-11"/>
          <Parameter Name="llKJ" Value="4.40553144268893E-12"/>
          <Parameter Name="llJK" Value="-1.1186874154119E-11"/>
          <Parameter Name="llJ" Value="1.46377911881959E-11"/>
        </AsymmetricTop>
        <AsymmetricTop Name="v=1" Symmetry="B1">
          <Parameter Name="Origin" Value="0.17074620102684"/>
          <Parameter Name="A" Value="7.44463850424816"/>
          <Parameter Name="B" Value="5.34386570325261"/>
          <Parameter Name="C" Value="3.753232634358"/>
          <Parameter Name="DK" Value="0.00021428221853"/>
          <Parameter Name="DJK" Value="-0.00048566602699"/>
          <Parameter Name="DJ" Value="0.00033205133866"/>
          <Parameter Name="deltaK" Value="-5.246157393E-5"/>
          <Parameter Name="deltaJ" Value="0.00011210335985"/>
          <Parameter Name="HK" Value="-7.52335604119834E-8"/>
          <Parameter Name="HKJ" Value="1.77525710136444E-7"/>
          <Parameter Name="HJK" Value="-1.60856561641721E-7"/>
          <Parameter Name="HJ" Value="6.33245416734266E-8"/>
          <Parameter Name="phiK" Value="-3.95551445126748E-9"/>
          <Parameter Name="phiJK" Value="2.39341247870885E-8"/>
          <Parameter Name="phiJ" Value="-3.82401127649449E-8"/>
          <Parameter Name="LKKJ" Value="1.29665336677683E-10"/>
          <Parameter Name="LJK" Value="-1.06206474346996E-10"/>
          <Parameter Name="LJJK" Value="5.4187470586735E-11"/>
          <Parameter Name="LJ" Value="-1.84466615234196E-11"/>
          <Parameter Name="llKJ" Value="2.85383596941588E-12"/>
          <Parameter Name="llJK" Value="-9.62525081268055E-12"/>
          <Parameter Name="llJ" Value="1.35698300322152E-11"/>
        </AsymmetricTop>
        <AsymmetricTopPerturbation bPower="1" cPower="1" Bra="v=1" Ket="v=0">
          <Parameter Name="Value" Value="0.10395943649789"/>
        </AsymmetricTopPerturbation>
        <AsymmetricTopPerturbation JPower="2" bPower="1" cPower="1" Bra="v=1" Ket="v=0">
          <Parameter Name="Value" Value="-1.839105638E-5"/>
        </AsymmetricTopPerturbation>
      </AsymmetricManifold>
      <AsymmetricManifold Name="B" Initial="True">
        <AsymmetricTop Name="A2" Symmetry="A2" Colour="Navy">
          <Parameter Name="Origin" Value="59349.4077678165" Float="true" Increment="0.1" StdDev="0.0763979737809425"/>
          <Parameter Name="A" Value="8.38780436253966" Float="true" Increment="0.001" StdDev="0.0162020409958993"/>
          <Parameter Name="B" Value="5.09222139838783" Float="true" Increment="0.001" StdDev="0.0138635139752345"/>
          <Parameter Name="C" Value="2.95078319155883" Float="true" Increment="0.001" StdDev="0.0254083398631909"/>
        </AsymmetricTop>
        <AsymmetricTop Name="B1" Symmetry="B1" Colour="Maroon">
          <Parameter Name="Origin" Value="59314.2608315499" Float="true" Increment="0.1" StdDev="0.0691585850541975"/>
          <Parameter Name="A" Value="7.66761223249246" Float="true" Increment="0.001" StdDev="0.011469359475672"/>
          <Parameter Name="B" Value="5.53845804136077" Float="true" Increment="0.001" StdDev="0.0103466067483988"/>
          <Parameter Name="C" Value="3.39642992474689" Float="true" Increment="0.001" StdDev="0.0117285865738581"/>
        </AsymmetricTop>
        <AsymmetricTopPerturbation cPower="1" Bra="A2" Ket="B1">
          <Parameter Name="Value" Value="-5.91"/>
        </AsymmetricTopPerturbation>
        <AsymmetricTopPerturbation aPower="1" bPower="1" Bra="A2" Ket="B1">
          <Parameter Name="Value" Value="0.480388698650982" Float="true" StdDev="0.0221080241135775"/>
        </AsymmetricTopPerturbation>
      </AsymmetricManifold>
      <TransitionMoments Bra="B" Ket="X">
        <SphericalTransitionMoment Rank="4" Component="2" Bra="A2" Ket="v=0"/>
        <SphericalTransitionMoment Rank="4" Component="-2" Bra="B1" Ket="v=0"/>
      </TransitionMoments>
    </AsymmetricMolecule>
  </Species>
  <Parameter Name="Gaussian" Increment="0.02"/>
  <Parameter Name="Lorentzian" Value="0.4" Increment="0.02"/>
  <Parameter Name="Temperature" Value="20"/>
  <Parameter Name="Fmin" Value="59265.7673201786"/>
  <Parameter Name="Fmax" Value="59456.1069705006"/>
  <Parameter Name="Tspin" Value="300"/>
  <FormSettings Name="LogWindow" ObsFileName="ND2H_b0x0.lin"/>
  <FormSettings Name="ConstantsWindow" ActiveObject="AsymmetricTopPerturbation: NH3 - ND2H - B - &lt;A2|c|B1&gt;"/>
  <FormSettings Name="LineWindow" Lines="
ND2H	B	1	3	2	X	2	3	1	59330.645	1	.00144076912724327	0	pP1,2(2)	B A2  1  0  1 - X v=0  2  1  2 : v0_084c_ND2H_672.8-674.8_laser_corrected.dat - Overlays
ND2H	B	1	2	1	X	1	2	1	59354.027	1	.00763992359310559	0	pQ0,1(1)	B A2  1  1  0 - X v=0  1  0  1 : v0_084c_ND2H_672.8-674.8_laser_corrected.dat - Overlays
ND2H	B	1	2	1	X	2	2	2	59323.909	1	.000493059039679748	0	pP2,1(2)	B A2  1  1  0 - X v=0  2  2  1 : v0_084c_ND2H_672.8-674.8_laser_corrected.dat - Overlays
ND2H	B	1	0	2	X	2	0	1	59335.098	1	.00550578237073692	0	pP0,2(2)	B A2  1  1  1 - X v=0  2  0  2 : v0_084c_ND2H_672.8-674.8_laser_corrected.dat - Overlays
ND2H	B	1	0	2	X	2	0	3	59322.034	1	.00109673343577436	0	rP2,0(2)	B A2  1  1  1 - X v=0  2  2  0 : v0_084c_ND2H_672.8-674.8_laser_corrected.dat - Overlays
ND2H	B	2	1	2	X	1	1	1	59365.208	1	.0114269405077437	0	rR1,1(1)	B A2  2  0  2 - X v=0  1  1  1 : v0_084c_ND2H_672.8-674.8_laser_corrected.dat - Overlays
ND2H	B	2	1	2	X	3	1	1	59323.909	1	.001275899331273	0	pP1,3(3)	B A2  2  0  2 - X v=0  3  1  3 : v0_084c_ND2H_672.8-674.8_laser_corrected.dat - Overlays
ND2H	B	2	0	2	X	0	0	1	59382.593	2	.0210431281841657	0	rS0,0(0)	B A2  2  1  1 - X v=0  0  0  0 : v0_084c_ND2H_672.8-674.8_laser_corrected.dat - Overlays
ND2H	B	2	0	2	X	0	0	1	59382.593	2	.0208474705531675	0	rS0,0(0)	B A2  2  1  1 - X v=0  0  0  0 : v0_084c_ND2H_672.8-674.8_laser_corrected.dat - Overlays
ND2H	B	2	0	2	X	2	0	1	59356.078	1	.0048888715294536	0	pQ0,2(2)	B A2  2  1  1 - X v=0  2  0  2 : v0_084c_ND2H_672.8-674.8_laser_corrected.dat - Overlays
ND2H	B	2	2	3	X	1	2	1	59369.365	1	.00172862478336012	0	rR0,1(1)	B A2  2  1  2 - X v=0  1  0  1 : v0_084c_ND2H_672.8-674.8_laser_corrected.dat - Overlays
ND2H	B	2	1	3	X	1	1	1	59380.799	1	.0126760659772628	0	pR1,1(1)	B A2  2  2  0 - X v=0  1  1  1 : v0_084c_ND2H_672.8-674.8_laser_corrected.dat - Overlays
ND2H	B	2	1	3	X	1	1	1	59380.777	1	.0128930235048565	0	pR1,1(1)	B A2  2  2  0 - X v=0  1  1  1 : v0_084c_ND2H_672.8-674.8_laser_corrected.dat - Overlays
ND2H	B	2	1	3	X	2	1	2	59359.448	1	.00226478233289142	0	pQ1,1(2)	B A2  2  2  0 - X v=0  2  1  1 : v0_084c_ND2H_672.8-674.8_laser_corrected.dat - Overlays
ND2H	B	3	3	3	X	1	3	2	59389.28	1	.00128504910604758	0	tS1,0(1)	B A2  3  0  3 - X v=0  1  1  0 : v0_084c_ND2H_672.8-674.8_laser_corrected.dat - Overlays
ND2H	B	3	2	2	X	1	2	1	59401.964	1	.00760699458739967	0	rS0,1(1)	B A2  3  1  2 - X v=0  1  0  1 : v0_084c_ND2H_672.8-674.8_laser_corrected.dat - Overlays
ND2H	B	3	3	4	X	1	3	2	59408.172	1	.00514702188579264	0	rS1,0(1)	B A2  3  2  1 - X v=0  1  1  0 : v0_084c_ND2H_672.8-674.8_laser_corrected.dat - Overlays
ND2H	B	3	3	4	X	2	3	1	59393.081	1	.00117442047057851	0	pR1,2(2)	B A2  3  2  1 - X v=0  2  1  2 : v0_084c_ND2H_672.8-674.8_laser_corrected.dat - Overlays
ND2H	B	3	1	3	X	1	1	1	59408.172	1	.00583474517340971	0	rS1,1(1)	B A2  3  2  2 - X v=0  1  1  1 : v0_084c_ND2H_672.8-674.8_laser_corrected.dat - Overlays
ND2H	B	3	2	3	X	2	2	2	59399.689	1	.00141104588259264	0	pR2,1(2)	B A2  3  3  0 - X v=0  2  2  1 : v0_084c_ND2H_672.8-674.8_laser_corrected.dat - Overlays
ND2H	B	3	0	4	X	2	0	3	59398.983	1	.00212473116292579	0	rR2,0(2)	B A2  3  3  1 - X v=0  2  2  0 : v0_084c_ND2H_672.8-674.8_laser_corrected.dat - Overlays
ND2H	B	4	0	2	X	2	0	1	59422.137	1	.00402157393976995	0	rS0,2(2)	B A2  4  1  3 - X v=0  2  0  2 : v0_084c_ND2H_672.8-674.8_laser_corrected.dat - Overlays
ND2H	B	4	1	4	X	2	1	2	59427.102	1	.00376549556217457	0	rS1,1(2)	B A2  4  2  2 - X v=0  2  1  1 : v0_084c_ND2H_672.8-674.8_laser_corrected.dat - Overlays
ND2H	B	4	0	4	X	2	0	3	59437.502	1	.00122813266274457	0	rS2,0(2)	B A2  4  3  1 - X v=0  2  2  0 : v0_084c_ND2H_672.8-674.8_laser_corrected.dat - Overlays
ND2H	B	4	2	5	X	2	2	2	59437.502	1	.000532322270059609	0	rS2,1(2)	B A2  4  3  2 - X v=0  2  2  1 : v0_084c_ND2H_672.8-674.8_laser_corrected.dat - Overlays
ND2H	B	1	0	1	X	2	0	3	59282.521	1	.00413693745938777	0	rP2,0(2)	B B1  1  0  1 - X v=0  2  2  0 : v0_084c_ND2H_672.8-674.8_laser_corrected.dat - Overlays
ND2H	B	1	1	1	X	1	1	1	59316.449	1	.0130965356754386	0	pQ1,1(1)	B B1  1  1  0 - X v=0  1  1  1 : v0_084c_ND2H_672.8-674.8_laser_corrected.dat - Overlays
ND2H	B	1	1	1	X	2	1	2	59294.824	1	.00155894167728817	0	pP1,1(2)	B B1  1  1  0 - X v=0  2  1  1 : v0_084c_ND2H_672.8-674.8_laser_corrected.dat - Overlays
ND2H	B	1	3	1	X	1	3	2	59311.385	1	.00765816199091974	0	rQ1,0(1)	B B1  1  1  1 - X v=0  1  1  0 : v0_084c_ND2H_672.8-674.8_laser_corrected.dat - Overlays
ND2H	B	1	3	1	X	2	3	1	59296.403	1	.000764392636259493	0	pP1,2(2)	B B1  1  1  1 - X v=0  2  1  2 : v0_084c_ND2H_672.8-674.8_laser_corrected.dat - Overlays
ND2H	B	2	2	1	X	2	2	2	59297.565	1	.00183491282678363	0	rQ2,1(2)	B B1  2  0  2 - X v=0  2  2  1 : v0_084c_ND2H_672.8-674.8_laser_corrected.dat - Overlays
ND2H	B	2	3	1	X	1	3	2	59333.954	1	.00399602278229142	0	rR1,0(1)	B B1  2  1  1 - X v=0  1  1  0 : v0_084c_ND2H_672.8-674.8_laser_corrected.dat - Overlays
ND2H	B	2	1	1	X	1	1	1	59326.093	2	.012059301752507	0	rR1,1(1)	B B1  2  1  2 - X v=0  1  1  1 : v0_084c_ND2H_672.8-674.8_laser_corrected.dat - Overlays
ND2H	B	2	1	1	X	2	1	2	59304.531	1	.00495824408409173	0	rQ1,1(2)	B B1  2  1  2 - X v=0  2  1  1 : v0_084c_ND2H_672.8-674.8_laser_corrected.dat - Overlays
ND2H	B	2	2	2	X	1	2	1	59345.581	1	.0163750281243019	0	pR0,1(1)	B B1  2  2  0 - X v=0  1  0  1 : v0_084c_ND2H_672.8-674.8_laser_corrected.dat - Overlays
ND2H	B	2	0	1	X	0	0	1	59352.719	1	.0441888391957509	0	rS0,0(0)	B B1  2  2  1 - X v=0  0  0  0 : v0_084c_ND2H_672.8-674.8_laser_corrected.dat - Overlays
ND2H	B	2	0	1	X	2	0	1	59326.093	2	.0047525460338135	0	pQ0,2(2)	B B1  2  2  1 - X v=0  2  0  2 : v0_084c_ND2H_672.8-674.8_laser_corrected.dat - Overlays
ND2H	B	3	0	1	X	2	0	1	59329.394	1	.00724907566157123	0	rR0,2(2)	B B1  3  0  3 - X v=0  2  0  2 : v0_084c_ND2H_672.8-674.8_laser_corrected.dat - Overlays
ND2H	B	3	0	1	X	3	0	2	59289.671	1	.000740380291469457	0	rQ2,2(3)	B B1  3  0  3 - X v=0  3  2  2 : v0_084c_ND2H_672.8-674.8_laser_corrected.dat - Overlays
ND2H	B	3	1	1	X	1	1	1	59362.877	1	.010173365336508	0	rS1,1(1)	B B1  3  1  2 - X v=0  1  1  1 : v0_084c_ND2H_672.8-674.8_laser_corrected.dat - Overlays
ND2H	B	3	3	1	X	2	3	1	59328.435	1	.00423512680807155	0	rR1,2(2)	B B1  3  1  3 - X v=0  2  1  2 : v0_084c_ND2H_672.8-674.8_laser_corrected.dat - Overlays
ND2H	B	3	0	2	X	2	0	1	59356.927	1	.00776913678877713	0	pR0,2(2)	B B1  3  2  1 - X v=0  2  0  2 : v0_084c_ND2H_672.8-674.8_laser_corrected.dat - Overlays
ND2H	B	3	2	1	X	1	2	1	59367.353	1	.0140878081195006	0	rS0,1(1)	B B1  3  2  2 - X v=0  1  0  1 : v0_084c_ND2H_672.8-674.8_laser_corrected.dat - Overlays
ND2H	B	3	1	2	X	1	1	1	59384.826	1	.0218861313737665	0	pS1,1(1)	B B1  3  3  0 - X v=0  1  1  1 : v0_084c_ND2H_672.8-674.8_laser_corrected.dat - Overlays
ND2H	B	4	3	1	X	2	3	1	59378.841	1	.00358626180870762	0	rS1,2(2)	B B1  4  1  3 - X v=0  2  1  2 : v0_084c_ND2H_672.8-674.8_laser_corrected.dat - Overlays
ND2H	B	4	1	1	X	3	1	1	59328.435	1	.00256839697558081	0	rR1,3(3)	B B1  4  1  4 - X v=0  3  1  3 : v0_084c_ND2H_672.8-674.8_laser_corrected.dat - Overlays
ND2H	B	4	3	2	X	2	3	1	59405.192	1	.00156666898741665	0	pS1,2(2)	B B1  4  3  1 - X v=0  2  1  2 : v0_084c_ND2H_672.8-674.8_laser_corrected.dat - Overlays
ND2H	B	4	1	2	X	2	1	2	59395.913	1	.00726406830072432	0	rS1,1(2)	B B1  4  3  2 - X v=0  2  1  1 : v0_084c_ND2H_672.8-674.8_laser_corrected.dat - Overlays
ND2H	B	4	2	4	X	2	2	2	59413.497	1	.00286455573506701	0	pS2,1(2)	B B1  4  4  0 - X v=0  2  2  1 : v0_084c_ND2H_672.8-674.8_laser_corrected.dat - Overlays
ND2H	B	4	0	3	X	2	0	3	59412.576	1	.00598700886884502	0	rS2,0(2)	B B1  4  4  1 - X v=0  2  2  0 : v0_084c_ND2H_672.8-674.8_laser_corrected.dat - Overlays
ND2H	B	5	1	1	X	3	1	1	59392.115	1	.00174915490716957	0	rS1,3(3)	B B1  5  1  4 - X v=0  3  1  3 : v0_084c_ND2H_672.8-674.8_laser_corrected.dat - Overlays
ND2H	B	5	1	2	X	3	1	1	59429.665	1	.000202341835869004	0	pS1,3(3)	B B1  5  3  2 - X v=0  3  1  3 : v0_084c_ND2H_672.8-674.8_laser_corrected.dat - Overlays
ND2H	B	5	0	4	X	3	0	2	59430.486	1	.000534102585438259	0	pS2,2(3)	B B1  5  4  1 - X v=0  3  2  2 : v0_084c_ND2H_672.8-674.8_laser_corrected.dat - Overlays
ND2H	B	5	1	4	X	3	1	3	59443.214	1	.000379466608063057	0	pS3,1(3)	B B1  5  5  0 - X v=0  3  3  1 : v0_084c_ND2H_672.8-674.8_laser_corrected.dat - Overlays
ND2H	B	5	3	5	X	3	3	3	59443.214	1	.000102282221712739	0	rS3,0(3)	B B1  5  5  1 - X v=0  3  3  0 : v0_084c_ND2H_672.8-674.8_laser_corrected.dat - Overlays
"/>
  <FormSettings Name="TransitionWindow" LowerJ="0" Replace="False" Skip="True"/>
  <FormSettings Name="CalWindow" ActiveObject="2+1 B-X_ND2H warm (101007_007).txt"/>
  <FormSettings Name="LevelWindow" CalcBoth="False" CalcLine="True" JoinHighest="True" TrackQuanta="False" XMax="12" ObsUpper="True">
    <Parameter Name="Ymax" Value="59400"/>
    <Parameter Name="Ymin" Value="59195"/>
    <Parameter Name="Reduction" Value="7"/>
  </FormSettings>
</Mixture>
