# Supplementary material for: Resonance enhanced multiphoton ionization spectroscopy of NHD2via the B1E′′-state
Source: Royal Society of Chemistry journal article supplement (doi:10.1039/c3cp00012e), 2013-01-01
Supplement: c3cp00012e_3.log [file c3cp00012e_3.log]

Pgopher 7.1.294 14 Dec 2012 9:42 32 bit Unicode (Delphi 23/23)
Mixture: ND2H_b1x0.pgo
  Units               cm1
  PrintLevel          Detail
  Precision           4
  BasisOrder          boDiagonal
  QuantumNumberFormat J
  FitCycles           1
  FitDetails          False
  AutoReplot          True
  AllowComplex        True
  NoLineList          False
  ShowEstUnc          False
  ShowDerivatives     False
  SVDlimit            5
  SVDThresh    1E-15
  ScaleChanges 1
  Species: NH3
    Jmax 20
    Concentration 1
    AsymmetricMolecule: ND2H
      JAdjustSym     True
      BlockMatrix    True
      PointGroup     C2v
      Representation IIIl
      SReduction     True
      eeWt           2
      eoWt           1
      oeWt           1
      ooWt           2
      C2zAxis        b
      C2xAxis        c
      PseudoC2v      False
      FakeSym        False
      PhaseAdjust    False
      Abundance 1
      AsymmetricManifold: X
        Initial       True
        EigenSearch   True
        LimitSearch   True
        AutoQConverge True
        UsePopParams  False
        AsymmetricTop: X v=0
          Symmetry A1
          Kmin     all
          Kmax     all
          A      7.44571610800829
          B      5.34422284499232
          C      3.75295877523377
          DK     0.00021649109331
          DJK    -0.00048922453879
          DJ     0.00033360773205
          deltaK -5.270730259E-5
          deltaJ 0.00011290946885
          HK     -8.32558336073952E-8
          HKJ    1.92454444601138E-7
          HJK    -1.7011815220515E-7
          HJ     6.5600286048557E-8
          phiK   -4.38005615204636E-9
          phiJK  2.50100050882534E-8
          phiJ   -3.98168972616383E-8
          LKKJ   1.41721643978115E-10
          LJK    -1.27759418150539E-10
          LJJK   6.55713993979128E-11
          LJ     -2.02633416481745E-11
          llKJ   4.40553144268893E-12
          llJK   -1.1186874154119E-11
          llJ    1.46377911881959E-11
        <N  ,K-2|A|N,K> = (-sqrt((N*(N+1)+(-K+1)*(K-2))*(N*(N+1)-K*(K-1))))/4
        <N  ,K  |A|N,K> = (N*(N+1)-K^2)/2
        <N  ,K+2|A|N,K> = (-sqrt((N*(N+1)+(-K-1)*(K+2))*(N*(N+1)-K*(K+1))))/4
        <N  ,K-2|B|N,K> = sqrt((N*(N+1)+(-K+1)*(K-2))*(N*(N+1)-K*(K-1)))/4
        <N  ,K  |B|N,K> = (N*(N+1)-K^2)/2
        <N  ,K+2|B|N,K> = sqrt((N*(N+1)+(-K-1)*(K+2))*(N*(N+1)-K*(K+1)))/4
        <N  ,K  |C|N,K> = K^2
        <N  ,K  |DK|N,K> = -K^4
        <N  ,K  |DJK|N,K> = -N*(N+1)*K^2
        <N  ,K  |DJ|N,K> = -N^2*(N+1)^2
        <N  ,K-4|deltaK|N,K> = sqrt((N*(N+1)+(-K+1)*(K-2))*(N*(N+1)+(-K+2)*(K-3))*(N*(N+1)+(-K+3)*(K-4))*(N*(N+1)-K*(K-1)))
        <N  ,K+4|deltaK|N,K> = sqrt((N*(N+1)+(-K-1)*(K+2))*(N*(N+1)+(-K-2)*(K+3))*(N*(N+1)+(-K-3)*(K+4))*(N*(N+1)-K*(K+1)))
        <N  ,K-2|deltaJ|N,K> = N*(N+1)*sqrt((N*(N+1)+(-K+1)*(K-2))*(N*(N+1)-K*(K-1)))
        <N  ,K+2|deltaJ|N,K> = N*(N+1)*sqrt((N*(N+1)+(-K-1)*(K+2))*(N*(N+1)-K*(K+1)))
        <N  ,K  |HK|N,K> = K^6
        <N  ,K  |HKJ|N,K> = N*(N+1)*K^4
        <N  ,K  |HJK|N,K> = N^2*(N+1)^2*K^2
        <N  ,K  |HJ|N,K> = N^3*(N+1)^3
        <N  ,K-6|phiK|N,K> = sqrt((N*(N+1)+(-K+1)*(K-2))*(N*(N+1)+(-K+2)*(K-3))*(N*(N+1)+(-K+3)*(K-4))*(N*(N+1)+(-K+4)*(K-5))*(N*(N+1)+(-K+5)*(K-6))*(N*(N+1)-K*(K-1)))
        <N  ,K+6|phiK|N,K> = sqrt((N*(N+1)+(-K-1)*(K+2))*(N*(N+1)+(-K-2)*(K+3))*(N*(N+1)+(-K-3)*(K+4))*(N*(N+1)+(-K-4)*(K+5))*(N*(N+1)+(-K-5)*(K+6))*(N*(N+1)-K*(K+1)))
        <N  ,K-4|phiJK|N,K> = N*(N+1)*sqrt((N*(N+1)+(-K+1)*(K-2))*(N*(N+1)+(-K+2)*(K-3))*(N*(N+1)+(-K+3)*(K-4))*(N*(N+1)-K*(K-1)))
        <N  ,K+4|phiJK|N,K> = N*(N+1)*sqrt((N*(N+1)+(-K-1)*(K+2))*(N*(N+1)+(-K-2)*(K+3))*(N*(N+1)+(-K-3)*(K+4))*(N*(N+1)-K*(K+1)))
        <N  ,K-2|phiJ|N,K> = N^2*(N+1)^2*sqrt((N*(N+1)+(-K+1)*(K-2))*(N*(N+1)-K*(K-1)))
        <N  ,K+2|phiJ|N,K> = N^2*(N+1)^2*sqrt((N*(N+1)+(-K-1)*(K+2))*(N*(N+1)-K*(K+1)))
        <N  ,K  |LKKJ|N,K> = N*(N+1)*K^6
        <N  ,K  |LJK|N,K> = N^2*(N+1)^2*K^4
        <N  ,K  |LJJK|N,K> = N^3*(N+1)^3*K^2
        <N  ,K  |LJ|N,K> = N^4*(N+1)^4
        <N  ,K-6|llKJ|N,K> = N*(N+1)*sqrt((N*(N+1)+(-K+1)*(K-2))*(N*(N+1)+(-K+2)*(K-3))*(N*(N+1)+(-K+3)*(K-4))*(N*(N+1)+(-K+4)*(K-5))*(N*(N+1)+(-K+5)*(K-6))*(N*(N+1)-K*(K-1)))
        <N  ,K+6|llKJ|N,K> = N*(N+1)*sqrt((N*(N+1)+(-K-1)*(K+2))*(N*(N+1)+(-K-2)*(K+3))*(N*(N+1)+(-K-3)*(K+4))*(N*(N+1)+(-K-4)*(K+5))*(N*(N+1)+(-K-5)*(K+6))*(N*(N+1)-K*(K+1)))
        <N  ,K-4|llJK|N,K> = N^2*(N+1)^2*sqrt((N*(N+1)+(-K+1)*(K-2))*(N*(N+1)+(-K+2)*(K-3))*(N*(N+1)+(-K+3)*(K-4))*(N*(N+1)-K*(K-1)))
        <N  ,K+4|llJK|N,K> = N^2*(N+1)^2*sqrt((N*(N+1)+(-K-1)*(K+2))*(N*(N+1)+(-K-2)*(K+3))*(N*(N+1)+(-K-3)*(K+4))*(N*(N+1)-K*(K+1)))
        <N  ,K-2|llJ|N,K> = N^3*(N+1)^3*sqrt((N*(N+1)+(-K+1)*(K-2))*(N*(N+1)-K*(K-1)))
        <N  ,K+2|llJ|N,K> = N^3*(N+1)^3*sqrt((N*(N+1)+(-K-1)*(K+2))*(N*(N+1)-K*(K+1)))
        AsymmetricTop: X v=1
          Symmetry B1
          Kmin     all
          Kmax     all
          Origin 0.17074620102684
          A      7.44463850424816
          B      5.34386570325261
          C      3.753232634358
          DK     0.00021428221853
          DJK    -0.00048566602699
          DJ     0.00033205133866
          deltaK -5.246157393E-5
          deltaJ 0.00011210335985
          HK     -7.52335604119834E-8
          HKJ    1.77525710136444E-7
          HJK    -1.60856561641721E-7
          HJ     6.33245416734266E-8
          phiK   -3.95551445126748E-9
          phiJK  2.39341247870885E-8
          phiJ   -3.82401127649449E-8
          LKKJ   1.29665336677683E-10
          LJK    -1.06206474346996E-10
          LJJK   5.4187470586735E-11
          LJ     -1.84466615234196E-11
          llKJ   2.85383596941588E-12
          llJK   -9.62525081268055E-12
          llJ    1.35698300322152E-11
        <N  ,K-2|A|N,K> = (-sqrt((N*(N+1)+(-K+1)*(K-2))*(N*(N+1)-K*(K-1))))/4
        <N  ,K  |A|N,K> = (N*(N+1)-K^2)/2
        <N  ,K+2|A|N,K> = (-sqrt((N*(N+1)+(-K-1)*(K+2))*(N*(N+1)-K*(K+1))))/4
        <N  ,K-2|B|N,K> = sqrt((N*(N+1)+(-K+1)*(K-2))*(N*(N+1)-K*(K-1)))/4
        <N  ,K  |B|N,K> = (N*(N+1)-K^2)/2
        <N  ,K+2|B|N,K> = sqrt((N*(N+1)+(-K-1)*(K+2))*(N*(N+1)-K*(K+1)))/4
        <N  ,K  |C|N,K> = K^2
        <N  ,K  |DK|N,K> = -K^4
        <N  ,K  |DJK|N,K> = -N*(N+1)*K^2
        <N  ,K  |DJ|N,K> = -N^2*(N+1)^2
        <N  ,K-4|deltaK|N,K> = sqrt((N*(N+1)+(-K+1)*(K-2))*(N*(N+1)+(-K+2)*(K-3))*(N*(N+1)+(-K+3)*(K-4))*(N*(N+1)-K*(K-1)))
        <N  ,K+4|deltaK|N,K> = sqrt((N*(N+1)+(-K-1)*(K+2))*(N*(N+1)+(-K-2)*(K+3))*(N*(N+1)+(-K-3)*(K+4))*(N*(N+1)-K*(K+1)))
        <N  ,K-2|deltaJ|N,K> = N*(N+1)*sqrt((N*(N+1)+(-K+1)*(K-2))*(N*(N+1)-K*(K-1)))
        <N  ,K+2|deltaJ|N,K> = N*(N+1)*sqrt((N*(N+1)+(-K-1)*(K+2))*(N*(N+1)-K*(K+1)))
        <N  ,K  |HK|N,K> = K^6
        <N  ,K  |HKJ|N,K> = N*(N+1)*K^4
        <N  ,K  |HJK|N,K> = N^2*(N+1)^2*K^2
        <N  ,K  |HJ|N,K> = N^3*(N+1)^3
        <N  ,K-6|phiK|N,K> = sqrt((N*(N+1)+(-K+1)*(K-2))*(N*(N+1)+(-K+2)*(K-3))*(N*(N+1)+(-K+3)*(K-4))*(N*(N+1)+(-K+4)*(K-5))*(N*(N+1)+(-K+5)*(K-6))*(N*(N+1)-K*(K-1)))
        <N  ,K+6|phiK|N,K> = sqrt((N*(N+1)+(-K-1)*(K+2))*(N*(N+1)+(-K-2)*(K+3))*(N*(N+1)+(-K-3)*(K+4))*(N*(N+1)+(-K-4)*(K+5))*(N*(N+1)+(-K-5)*(K+6))*(N*(N+1)-K*(K+1)))
        <N  ,K-4|phiJK|N,K> = N*(N+1)*sqrt((N*(N+1)+(-K+1)*(K-2))*(N*(N+1)+(-K+2)*(K-3))*(N*(N+1)+(-K+3)*(K-4))*(N*(N+1)-K*(K-1)))
        <N  ,K+4|phiJK|N,K> = N*(N+1)*sqrt((N*(N+1)+(-K-1)*(K+2))*(N*(N+1)+(-K-2)*(K+3))*(N*(N+1)+(-K-3)*(K+4))*(N*(N+1)-K*(K+1)))
        <N  ,K-2|phiJ|N,K> = N^2*(N+1)^2*sqrt((N*(N+1)+(-K+1)*(K-2))*(N*(N+1)-K*(K-1)))
        <N  ,K+2|phiJ|N,K> = N^2*(N+1)^2*sqrt((N*(N+1)+(-K-1)*(K+2))*(N*(N+1)-K*(K+1)))
        <N  ,K  |LKKJ|N,K> = N*(N+1)*K^6
        <N  ,K  |LJK|N,K> = N^2*(N+1)^2*K^4
        <N  ,K  |LJJK|N,K> = N^3*(N+1)^3*K^2
        <N  ,K  |LJ|N,K> = N^4*(N+1)^4
        <N  ,K-6|llKJ|N,K> = N*(N+1)*sqrt((N*(N+1)+(-K+1)*(K-2))*(N*(N+1)+(-K+2)*(K-3))*(N*(N+1)+(-K+3)*(K-4))*(N*(N+1)+(-K+4)*(K-5))*(N*(N+1)+(-K+5)*(K-6))*(N*(N+1)-K*(K-1)))
        <N  ,K+6|llKJ|N,K> = N*(N+1)*sqrt((N*(N+1)+(-K-1)*(K+2))*(N*(N+1)+(-K-2)*(K+3))*(N*(N+1)+(-K-3)*(K+4))*(N*(N+1)+(-K-4)*(K+5))*(N*(N+1)+(-K-5)*(K+6))*(N*(N+1)-K*(K+1)))
        <N  ,K-4|llJK|N,K> = N^2*(N+1)^2*sqrt((N*(N+1)+(-K+1)*(K-2))*(N*(N+1)+(-K+2)*(K-3))*(N*(N+1)+(-K+3)*(K-4))*(N*(N+1)-K*(K-1)))
        <N  ,K+4|llJK|N,K> = N^2*(N+1)^2*sqrt((N*(N+1)+(-K-1)*(K+2))*(N*(N+1)+(-K-2)*(K+3))*(N*(N+1)+(-K-3)*(K+4))*(N*(N+1)-K*(K+1)))
        <N  ,K-2|llJ|N,K> = N^3*(N+1)^3*sqrt((N*(N+1)+(-K+1)*(K-2))*(N*(N+1)-K*(K-1)))
        <N  ,K+2|llJ|N,K> = N^3*(N+1)^3*sqrt((N*(N+1)+(-K-1)*(K+2))*(N*(N+1)-K*(K+1)))
        AsymmetricTopPerturbation: X <v=1|bc|v=0>
          Value 0.10395943649789
        <N  ,K-1|bc|N,K> = (sqrt(N*(N+1)-K*(K-1))*(2*K-1))/2
        <N  ,K+1|bc|N,K> = (sqrt(N*(N+1)-K*(K+1))*(2*K+1))/2

        AsymmetricTopPerturbation: X <v=1|J^2bc|v=0>
          Value -1.839105638E-5
        <N  ,K-1|J^2bc|N,K> = (N*(N+1)*sqrt(N*(N+1)-K*(K-1))*(2*K-1))/2
        <N  ,K+1|J^2bc|N,K> = (N*(N+1)*sqrt(N*(N+1)-K*(K+1))*(2*K+1))/2

      AsymmetricManifold: B
        Initial       True
        EigenSearch   True
        LimitSearch   True
        AutoQConverge True
        UsePopParams  False
        AsymmetricTop: B A2
          Colour   Navy
          Symmetry B2
          Kmin     all
          Kmax     all
          Origin 60108.9889439547           Float, Increment = 0.518657960653373
          A      7.96694441292521           Float, Increment = 0.130016588284358
          B      5.01534102816885           Float, Increment = 0.0926255991997841
          C      3.1594383543455            Float, Increment = 0.0786329744075143
        <N  ,K-2|A|N,K> = (-sqrt((N*(N+1)+(-K+1)*(K-2))*(N*(N+1)-K*(K-1))))/4
        <N  ,K  |A|N,K> = (N*(N+1)-K^2)/2
        <N  ,K+2|A|N,K> = (-sqrt((N*(N+1)+(-K-1)*(K+2))*(N*(N+1)-K*(K+1))))/4
        <N  ,K-2|B|N,K> = sqrt((N*(N+1)+(-K+1)*(K-2))*(N*(N+1)-K*(K-1)))/4
        <N  ,K  |B|N,K> = (N*(N+1)-K^2)/2
        <N  ,K+2|B|N,K> = sqrt((N*(N+1)+(-K-1)*(K+2))*(N*(N+1)-K*(K+1)))/4
        <N  ,K  |C|N,K> = K^2
        AsymmetricTop: B B1
          Colour   Maroon
          Symmetry A1
          Kmin     all
          Kmax     all
          Origin 60076.8595291316           Float, Increment = 0.421252634406853
          A      7.31319960674704           Float, Increment = 0.0786286558622293
          B      5.3802307202055            Float, Increment = 0.120508799188522
          C      3.1594383543455            Float, Increment = 0.001
        <N  ,K-2|A|N,K> = (-sqrt((N*(N+1)+(-K+1)*(K-2))*(N*(N+1)-K*(K-1))))/4
        <N  ,K  |A|N,K> = (N*(N+1)-K^2)/2
        <N  ,K+2|A|N,K> = (-sqrt((N*(N+1)+(-K-1)*(K+2))*(N*(N+1)-K*(K+1))))/4
        <N  ,K-2|B|N,K> = sqrt((N*(N+1)+(-K+1)*(K-2))*(N*(N+1)-K*(K-1)))/4
        <N  ,K  |B|N,K> = (N*(N+1)-K^2)/2
        <N  ,K+2|B|N,K> = sqrt((N*(N+1)+(-K-1)*(K+2))*(N*(N+1)-K*(K+1)))/4
        <N  ,K  |C|N,K> = K^2
        AsymmetricTopPerturbation: B <A2|c|B1>
          Value -5.28188581453238          Float, Increment = 0.292001309883553
        <N  ,K  |c|N,K> = K

        AsymmetricTopPerturbation: B <A2|ab|B1>
          Value 0.408927239808417          Float
        <N  ,K-2|ab|N,K> = (-sqrt((-N*(N+1)+(K-1)*(K-2))*(N*(N+1)-K*(K-1))))/2
        <N  ,K+2|ab|N,K> = sqrt((-N*(N+1)+(K+1)*(K+2))*(N*(N+1)-K*(K+1)))/2

      TransitionMoments: <B|mu|X>
        SphericalTransitionMoment: <A2|T(2,1)|v=1>
          Rank      2
          Component 1
          Strength 1
        Reduced Matrix Elements of <A2|T(2,1)|v=1>
        <N-2,K-1|T(2,1)|N,K> = -1^(2*N-2*K-5)*sqrt(((N-K)*(N+K)*(N+K-1)*(N+K-2))/(N*(2*N-1)*(N-1)))
        <N-2,K+1|T(2,1)|N,K> = -1^(2*N-2*K-7)*sqrt(((N-K)*(N-K-1)*(N-K-2)*(N+K))/(N*(2*N-1)*(N-1)))
        <N-1,K-1|T(2,1)|N,K> = -1^(2*N-2*K-3)*(N-2*K+1)*sqrt(((N+K)*(N+K-1))/(2*N*(N-1)*(N+1)))
        <N-1,K+1|T(2,1)|N,K> = -1^(2*N-2*K-5)*(-N-2*K-1)*sqrt(((N-K)*(N-K-1))/(2*N*(N-1)*(N+1)))
        <N  ,K-1|T(2,1)|N,K> = (-1^(2*N-2*K-1)*(2*N+1)*sqrt((6*(N-K+1)*(N+K))/(N*(2*N-1)*(2*N+1)*(2*N+3)*(N+1)))*(-2*K+1))/2
        <N  ,K+1|T(2,1)|N,K> = (-1^(2*N-2*K-3)*(2*N+1)*sqrt((6*(N-K)*(N+K+1))/(N*(2*N-1)*(2*N+1)*(2*N+3)*(N+1)))*(2*K+1))/2
        <N+1,K-1|T(2,1)|N,K> = -1^(2*N-2*K+1)*(-N-2*K)*sqrt(((N-K+1)*(N-K+2))/(2*N*(N+1)*(N+2)))
        <N+1,K+1|T(2,1)|N,K> = -1^(2*N-2*K-1)*(N-2*K)*sqrt(((N+K+1)*(N+K+2))/(2*N*(N+1)*(N+2)))
        <N+2,K-1|T(2,1)|N,K> = -1^(2*(N-K+2))*sqrt(((N-K+1)*(N-K+2)*(N-K+3)*(N+K+1))/((2*N+3)*(N+1)*(N+2)))
        <N+2,K+1|T(2,1)|N,K> = -1^(2*(N-K+1))*sqrt(((N-K+1)*(N+K+1)*(N+K+2)*(N+K+3))/((2*N+3)*(N+1)*(N+2)))
        Line Strengths from <A2|T(2,1)|v=1>
        <N-2,K-1|T(2,1)|N,K> = (-1^(2*(2*N-2*K-5))*(N-K)*(N+K)*(N+K-1)*(N+K-2))/(N*(2*N-1)*(N-1))
        <N-2,K+1|T(2,1)|N,K> = (-1^(2*(2*N-2*K-7))*(N-K)*(N-K-1)*(N-K-2)*(N+K))/(N*(2*N-1)*(N-1))
        <N-1,K-1|T(2,1)|N,K> = (-1^(2*(2*N-2*K-3))*(N-2*K+1)^2*(N+K)*(N+K-1))/(2*N*(N-1)*(N+1))
        <N-1,K+1|T(2,1)|N,K> = (-1^(2*(2*N-2*K-5))*(-N-2*K-1)^2*(N-K)*(N-K-1))/(2*N*(N-1)*(N+1))
        <N  ,K-1|T(2,1)|N,K> = (3*-1^(2*(2*N-2*K-1))*(2*N+1)*(N-K+1)*(N+K)*(-2*K+1)^2)/(2*N*(2*N-1)*(2*N+3)*(N+1))
        <N  ,K+1|T(2,1)|N,K> = (3*-1^(2*(2*N-2*K-3))*(2*N+1)*(N-K)*(N+K+1)*(2*K+1)^2)/(2*N*(2*N-1)*(2*N+3)*(N+1))
        <N+1,K-1|T(2,1)|N,K> = (-1^(2*(2*N-2*K+1))*(-N-2*K)^2*(N-K+1)*(N-K+2))/(2*N*(N+1)*(N+2))
        <N+1,K+1|T(2,1)|N,K> = (-1^(2*(2*N-2*K-1))*(N-2*K)^2*(N+K+1)*(N+K+2))/(2*N*(N+1)*(N+2))
        <N+2,K-1|T(2,1)|N,K> = (-1^(4*(N-K+2))*(N-K+1)*(N-K+2)*(N-K+3)*(N+K+1))/((2*N+3)*(N+1)*(N+2))
        <N+2,K+1|T(2,1)|N,K> = (-1^(4*(N-K+1))*(N-K+1)*(N+K+1)*(N+K+2)*(N+K+3))/((2*N+3)*(N+1)*(N+2))

        SphericalTransitionMoment: <B1|T(2,-1)|v=1>
          Rank      2
          Component -1
          Strength 1
        Reduced Matrix Elements of <B1|T(2,-1)|v=1>
        <N-2,K-1|T(2,-1)|N,K> = -1^(2*(N-K-2))*sqrt(((N-K)*(N+K)*(N+K-1)*(N+K-2))/(N*(2*N-1)*(N-1)))
        <N-2,K+1|T(2,-1)|N,K> = -1^(2*N-2*K-7)*sqrt(((N-K)*(N-K-1)*(N-K-2)*(N+K))/(N*(2*N-1)*(N-1)))
        <N-1,K-1|T(2,-1)|N,K> = -1^(2*(N-K-1))*(N-2*K+1)*sqrt(((N+K)*(N+K-1))/(2*N*(N-1)*(N+1)))
        <N-1,K+1|T(2,-1)|N,K> = -1^(2*N-2*K-5)*(-N-2*K-1)*sqrt(((N-K)*(N-K-1))/(2*N*(N-1)*(N+1)))
        <N  ,K-1|T(2,-1)|N,K> = (-1^(2*(N-K))*(2*N+1)*sqrt((6*(N-K+1)*(N+K))/(N*(2*N-1)*(2*N+1)*(2*N+3)*(N+1)))*(-2*K+1))/2
        <N  ,K+1|T(2,-1)|N,K> = (-1^(2*N-2*K-3)*(2*N+1)*sqrt((6*(N-K)*(N+K+1))/(N*(2*N-1)*(2*N+1)*(2*N+3)*(N+1)))*(2*K+1))/2
        <N+1,K-1|T(2,-1)|N,K> = -1^(2*(N-K+1))*(-N-2*K)*sqrt(((N-K+1)*(N-K+2))/(2*N*(N+1)*(N+2)))
        <N+1,K+1|T(2,-1)|N,K> = -1^(2*N-2*K-1)*(N-2*K)*sqrt(((N+K+1)*(N+K+2))/(2*N*(N+1)*(N+2)))
        <N+2,K-1|T(2,-1)|N,K> = -1^(2*N-2*K+5)*sqrt(((N-K+1)*(N-K+2)*(N-K+3)*(N+K+1))/((2*N+3)*(N+1)*(N+2)))
        <N+2,K+1|T(2,-1)|N,K> = -1^(2*(N-K+1))*sqrt(((N-K+1)*(N+K+1)*(N+K+2)*(N+K+3))/((2*N+3)*(N+1)*(N+2)))
        Line Strengths from <B1|T(2,-1)|v=1>
        <N-2,K-1|T(2,-1)|N,K> = (-1^(4*(N-K-2))*(N-K)*(N+K)*(N+K-1)*(N+K-2))/(N*(2*N-1)*(N-1))
        <N-2,K+1|T(2,-1)|N,K> = (-1^(2*(2*N-2*K-7))*(N-K)*(N-K-1)*(N-K-2)*(N+K))/(N*(2*N-1)*(N-1))
        <N-1,K-1|T(2,-1)|N,K> = (-1^(4*(N-K-1))*(N-2*K+1)^2*(N+K)*(N+K-1))/(2*N*(N-1)*(N+1))
        <N-1,K+1|T(2,-1)|N,K> = (-1^(2*(2*N-2*K-5))*(-N-2*K-1)^2*(N-K)*(N-K-1))/(2*N*(N-1)*(N+1))
        <N  ,K-1|T(2,-1)|N,K> = (3*-1^(4*(N-K))*(2*N+1)*(N-K+1)*(N+K)*(-2*K+1)^2)/(2*N*(2*N-1)*(2*N+3)*(N+1))
        <N  ,K+1|T(2,-1)|N,K> = (3*-1^(2*(2*N-2*K-3))*(2*N+1)*(N-K)*(N+K+1)*(2*K+1)^2)/(2*N*(2*N-1)*(2*N+3)*(N+1))
        <N+1,K-1|T(2,-1)|N,K> = (-1^(4*(N-K+1))*(-N-2*K)^2*(N-K+1)*(N-K+2))/(2*N*(N+1)*(N+2))
        <N+1,K+1|T(2,-1)|N,K> = (-1^(2*(2*N-2*K-1))*(N-2*K)^2*(N+K+1)*(N+K+2))/(2*N*(N+1)*(N+2))
        <N+2,K-1|T(2,-1)|N,K> = (-1^(2*(2*N-2*K+5))*(N-K+1)*(N-K+2)*(N-K+3)*(N+K+1))/((2*N+3)*(N+1)*(N+2))
        <N+2,K+1|T(2,-1)|N,K> = (-1^(4*(N-K+1))*(N-K+1)*(N+K+1)*(N+K+2)*(N+K+3))/((2*N+3)*(N+1)*(N+2))


Residuals before fit for ND2H for the B - X Transition
    J' S' #'    J" S" #"     Observed    Calculated      Obs-Calc StdDev 
    0 E-  1     2 O+  2    60076.4380    60076.3976        0.0404 1       :B A2  0  0  0 - X v=0  2  1  1:: .00236 :   5:ND2H_b1x0.lin
    1 O-  2     1 E+  2    60105.3360    60105.2804        0.0556 1       :B A2  1  0  1 - X v=0  1  1  0:: .01028 :   6:ND2H_b1x0.lin
    1 O-  2     2 E-  1    60090.1630    60090.2969       -0.1339 1       :B A2  1  0  1 - X v=0  2  1  2:: .00412 :   7:ND2H_b1x0.lin
    1 E-  1     1 O+  1    60112.8340    60112.8742       -0.0402 1       :B A2  1  1  0 - X v=0  1  0  1:: .01645 :   8:ND2H_b1x0.lin
    1 O+  2     2 E+  1    60094.2520    60094.2492        0.0028 1       :B A2  1  1  1 - X v=0  2  0  2:: .00381 :   9:ND2H_b1x0.lin
    2 E-  2     1 O-  1    60124.6090    60124.5849        0.0241 1       :B A2  2  0  2 - X v=0  1  1  1:: .00741 :  10:ND2H_b1x0.lin
    2 O-  2     2 E+  1    60114.6730    60114.6243        0.0487 1       :B A2  2  1  1 - X v=0  2  0  2:: .00317 :  11:ND2H_b1x0.lin
    2 O-  2     2 E+  3    60101.7530    60101.7791       -0.0261 1       :B A2  2  1  1 - X v=0  2  2  0:: .00101 :  12:ND2H_b1x0.lin
    2 E+  3     1 O+  1    60128.8160    60128.7719        0.0441 1       :B A2  2  1  2 - X v=0  1  0  1:: .00408 :  13:ND2H_b1x0.lin
    2 E+  3     2 O-  2    60098.9900    60099.0000       -0.0100 1       :B A2  2  1  2 - X v=0  2  2  1:: .00158 :  14:ND2H_b1x0.lin
    2 E+  3     3 O+  1    60086.0860    60085.9992        0.0868 1       :B A2  2  1  2 - X v=0  3  0  3:: .00343 :  15:ND2H_b1x0.lin
    2 E-  3     1 O-  1    60138.7770    60138.7973       -0.0203 1       :B A2  2  2  0 - X v=0  1  1  1::  .0081 :  16:ND2H_b1x0.lin
    2 E-  3     2 O+  2    60117.2470    60117.3975       -0.1505 1       :B A2  2  2  0 - X v=0  2  1  1:: .00147 :  17:ND2H_b1x0.lin
    2 O+  2     1 E+  2    60137.0000    60136.9543        0.0457 1       :B A2  2  2  1 - X v=0  1  1  0::  .0063 :  18:ND2H_b1x0.lin
    2 O+  2     2 E-  1    60121.9420    60121.9707       -0.0287 1       :B A2  2  2  1 - X v=0  2  1  2:: .00758 :  19:ND2H_b1x0.lin
    3 O-  3     1 E+  2    60148.6010    60148.4887        0.1123 1       :B A2  3  0  3 - X v=0  1  1  0:: .00197 :  20:ND2H_b1x0.lin
    3 O-  3     2 E-  1    60133.5070    60133.5051        0.0019 1       :B A2  3  0  3 - X v=0  2  1  2:: .00485 :  21:ND2H_b1x0.lin
    3 E-  2     1 O+  1    60160.7480    60160.6777        0.0703 1       :B A2  3  1  2 - X v=0  1  0  1:: .01773 :  22:ND2H_b1x0.lin
    3 O-  4     1 E+  2    60165.7550    60165.6963        0.0587 1       :B A2  3  2  1 - X v=0  1  1  0:: .01224 :  23:ND2H_b1x0.lin
    3 O-  4     2 E-  1    60150.7820    60150.7128        0.0692 1       :B A2  3  2  1 - X v=0  2  1  2:: .00302 :  24:ND2H_b1x0.lin
    3 E+  3     1 O-  1    60165.7550    60166.0288       -0.2738 1       :B A2  3  2  2 - X v=0  1  1  1:: .00324 :  25:ND2H_b1x0.lin
    3 E-  3     1 O+  1    60185.0420    60185.0491       -0.0071 1       :B A2  3  3  0 - X v=0  1  0  1:: .00122 :  26:ND2H_b1x0.lin
    3 E-  3     2 O-  2    60155.3760    60155.2773        0.0987 1       :B A2  3  3  0 - X v=0  2  2  1:: .00358 :  27:ND2H_b1x0.lin
    4 O-  2     2 E+  1    60180.0710    60180.2085       -0.1375 1       :B A2  4  1  3 - X v=0  2  0  2::   .002 :  28:ND2H_b1x0.lin
    4 E-  4     2 O+  2    60183.9130    60183.8810        0.0320 1       :B A2  4  2  2 - X v=0  2  1  1:: .00226 :  29:ND2H_b1x0.lin
    4 O+  3     2 E-  1    60185.0420    60185.0515       -0.0095 1       :B A2  4  2  3 - X v=0  2  1  2::   .002 :  30:ND2H_b1x0.lin
    4 O-  4     2 E+  3    60192.8010    60192.5740        0.2270 1       :B A2  4  3  1 - X v=0  2  2  0:: .00057 :  31:ND2H_b1x0.lin
    4 E+  5     2 O-  2    60192.8010    60192.9284       -0.1274 1       :B A2  4  3  2 - X v=0  2  2  1:: .00078 :  32:ND2H_b1x0.lin
    4 E-  5     3 E+  3    60173.3100    60173.2831        0.0269 1       :B A2  4  4  0 - X v=0  3  3  0:: 6.5e-5 :  33:ND2H_b1x0.lin
    4 E-  5     3 O-  3    60173.3100    60173.4135       -0.1035 1       :B A2  4  4  0 - X v=0  3  3  1:: 7.2e-5 :  34:ND2H_b1x0.lin
    4 O+  4     3 E+  3    60173.3100    60173.2817        0.0283 1       :B A2  4  4  1 - X v=0  3  3  0:: .00026 :  35:ND2H_b1x0.lin
    1 E+  1     1 O-  1    60078.4230    60078.3614        0.0616 1       :B B1  1  1  0 - X v=0  1  1  1:: .00553 :  38:ND2H_b1x0.lin
    1 O-  1     1 E+  2    60073.4980    60073.6231       -0.1251 1       :B B1  1  1  1 - X v=0  1  1  0:: .01469 :  39:ND2H_b1x0.lin
    2 E+  1     1 O+  1    60089.6580    60089.3193        0.3387 1       :B B1  2  0  2 - X v=0  1  0  1:: .00649 :  40:ND2H_b1x0.lin
    2 E+  1     2 O-  2    60059.5790    60059.5474        0.0316 1       :B B1  2  0  2 - X v=0  2  2  1:: .00514 :  41:ND2H_b1x0.lin
    2 O+  1     1 E+  2    60095.4140    60095.3380        0.0760 1       :B B1  2  1  1 - X v=0  1  1  0:: .00749 :  42:ND2H_b1x0.lin
    2 O+  1     2 E-  1    60080.3090    60080.3544       -0.0454 1       :B B1  2  1  1 - X v=0  2  1  2:: .00345 :  43:ND2H_b1x0.lin
    2 E-  1     1 O-  1    60087.8720    60087.7787        0.0933 1       :B B1  2  1  2 - X v=0  1  1  1:: .00599 :  44:ND2H_b1x0.lin
    2 E-  1     2 O+  2    60066.4700    60066.3789        0.0911 1       :B B1  2  1  2 - X v=0  2  1  1:: .00325 :  45:ND2H_b1x0.lin
    2 E+  2     1 O+  1    60106.3000    60106.3572       -0.0572 1       :B B1  2  2  0 - X v=0  1  0  1:: .03141 :  46:ND2H_b1x0.lin
    2 O-  1     0 E+  1    60113.2490    60113.5478       -0.2988 1       :B B1  2  2  1 - X v=0  0  0  0:: .01787 :  47:ND2H_b1x0.lin
    3 O-  1     2 E-  1    60089.6580    60089.6180        0.0400 1       :B B1  3  1  3 - X v=0  2  1  2:: .01104 :  48:ND2H_b1x0.lin
    3 E-  1     1 O+  1    60127.6360    60127.6914       -0.0554 1       :B B1  3  2  2 - X v=0  1  0  1:: .03312 :  49:ND2H_b1x0.lin
    3 E+  2     1 O-  1    60144.0270    60144.0920       -0.0650 1       :B B1  3  3  0 - X v=0  1  1  1:: .01025 :  50:ND2H_b1x0.lin
    3 O-  2     1 E+  2    60141.4490    60141.5886       -0.1396 1       :B B1  3  3  1 - X v=0  1  1  0:: .03364 :  51:ND2H_b1x0.lin
    4 E+  1     3 O+  1    60089.6580    60089.7901       -0.1321 1       :B B1  4  0  4 - X v=0  3  0  3:: .00456 :  52:ND2H_b1x0.lin
    4 O+  2     2 E-  1    60164.0770    60163.9438        0.1332 1       :B B1  4  3  1 - X v=0  2  1  2:: .00369 :  53:ND2H_b1x0.lin
    4 E-  2     2 O+  2    60154.7280    60154.6899        0.0381 1       :B B1  4  3  2 - X v=0  2  1  1:: .00472 :  54:ND2H_b1x0.lin
    5 E+  2     3 O-  1    60186.7800    60186.7776        0.0024 1       :B B1  5  3  2 - X v=0  3  1  3:: .00013 :  55:ND2H_b1x0.lin
    5 O+  4     3 E-  2    60186.7800    60186.9158       -0.1358 1       :B B1  5  4  1 - X v=0  3  2  2:: .00034 :  56:ND2H_b1x0.lin
    5 E-  2     3 O+  3    60181.6210    60181.6712       -0.0502 1       :B B1  5  4  2 - X v=0  3  2  1:: .00105 :  57:ND2H_b1x0.lin
    5 E+  4     3 O-  3    60197.0700    60197.0918       -0.0218 1       :B B1  5  5  0 - X v=0  3  3  1:: .00012 :  58:ND2H_b1x0.lin
    5 O-  5     3 E+  3    60197.0700    60196.8570        0.2130 1       :B B1  5  5  1 - X v=0  3  3  0:: .00046 :  59:ND2H_b1x0.lin

53 Observations,  9 Parameters
Initial Average Error: 0.122326465187405
Predicted New Error:   0.122326465187405
Parameters:
  # Old                 New                 Std Dev   Change/Std Sens    Summary              Name
  1 60108.9889439547    60108.988943958     .04570909    0.0000  .001884 60108.989(46)        B A2 Origin
  2 7.96694441292521    7.96694441208485    .00567954    0.0000  .000293 7.9669(57)           B A2 A
  3 5.01534102816885    5.01534102712548    .00905444    0.0000  .000389 5.0153(91)           B A2 B
  4 3.1594383543455     3.15943835426736    .00672153    0.0000  .000333 3.1594(67)           B A2 C
  5 60076.8595291316    60076.8595291239    .05741388    0.0000  .002307 60076.860(57)        B B1 Origin
  6 7.31319960674704    7.3131996087637     .00789976    0.0000  .000274 7.3132(79)           B B1 A
  7 5.3802307202055     5.38023072190617    .00800099    0.0000  .000338 5.3802(80)           B B1 B
  8 -5.28188581453238   -5.28188581229833   .02934146    0.0000  .001464 -5.282(29)           B <A2|c|B1> Value
  9 .408927239808417    .40892724474008     .01561796    0.0000  .000491 0.409(16)            B <A2|ab|B1> Value
Constraints:
NH3.ND2H.B.B1.C := NH3.ND2H.B.A2.C

Correlation Matrix
       1       2       3       4       5       6       7       8       9
  1   1.000
  2  -0.589   1.000
  3  -0.273   0.049   1.000
  4  -0.358   0.181  -0.358   1.000
  5  -0.202   0.275   0.129  -0.262   1.000
  6   0.237  -0.425  -0.375   0.036  -0.558   1.000
  7   0.230  -0.344  -0.223  -0.094  -0.543   0.411   1.000
  8   0.422  -0.313   0.327  -0.295  -0.434   0.205   0.243   1.000
  9   0.239  -0.468  -0.367  -0.047  -0.423   0.796   0.675   0.243   1.000
