# Supplementary material for: Resonance enhanced multiphoton ionization spectroscopy of NHD2via the B1E′′-state
Source: Royal Society of Chemistry journal article supplement (doi:10.1039/c3cp00012e), 2013-01-01
Supplement: c3cp00012e_4.log [file c3cp00012e_4.log]

Pgopher 7.1.294 14 Dec 2012 14:26 32 bit Unicode (Delphi 23/23)
Mixture: ND2H_b3x0.pgo
  Units               cm1
  PrintLevel          Detail
  Precision           4
  BasisOrder          boDiagonal
  QuantumNumberFormat J
  FitCycles           1
  FitDetails          False
  AutoReplot          True
  AllowComplex        True
  NoLineList          False
  ShowEstUnc          False
  ShowDerivatives     False
  SVDlimit            5
  SVDThresh    1E-15
  ScaleChanges 1
  Species: NH3
    Jmax 20
    Concentration 1
    AsymmetricMolecule: ND2H
      JAdjustSym     True
      BlockMatrix    True
      PointGroup     C2v
      Representation IIIl
      SReduction     True
      eeWt           2
      eoWt           1
      oeWt           1
      ooWt           2
      C2zAxis        b
      C2xAxis        c
      PseudoC2v      False
      FakeSym        False
      PhaseAdjust    False
      Abundance 1
      AsymmetricManifold: X
        Initial       True
        EigenSearch   True
        LimitSearch   True
        AutoQConverge True
        UsePopParams  False
        AsymmetricTop: X v=0
          Symmetry A1
          Kmin     all
          Kmax     all
          A      7.44571610800829
          B      5.34422284499232
          C      3.75295877523377
          DK     0.00021649109331
          DJK    -0.00048922453879
          DJ     0.00033360773205
          deltaK -5.270730259E-5
          deltaJ 0.00011290946885
          HK     -8.32558336073952E-8
          HKJ    1.92454444601138E-7
          HJK    -1.7011815220515E-7
          HJ     6.5600286048557E-8
          phiK   -4.38005615204636E-9
          phiJK  2.50100050882534E-8
          phiJ   -3.98168972616383E-8
          LKKJ   1.41721643978115E-10
          LJK    -1.27759418150539E-10
          LJJK   6.55713993979128E-11
          LJ     -2.02633416481745E-11
          llKJ   4.40553144268893E-12
          llJK   -1.1186874154119E-11
          llJ    1.46377911881959E-11
        <N  ,K-2|A|N,K> = (-sqrt((N*(N+1)+(-K+1)*(K-2))*(N*(N+1)-K*(K-1))))/4
        <N  ,K  |A|N,K> = (N*(N+1)-K^2)/2
        <N  ,K+2|A|N,K> = (-sqrt((N*(N+1)+(-K-1)*(K+2))*(N*(N+1)-K*(K+1))))/4
        <N  ,K-2|B|N,K> = sqrt((N*(N+1)+(-K+1)*(K-2))*(N*(N+1)-K*(K-1)))/4
        <N  ,K  |B|N,K> = (N*(N+1)-K^2)/2
        <N  ,K+2|B|N,K> = sqrt((N*(N+1)+(-K-1)*(K+2))*(N*(N+1)-K*(K+1)))/4
        <N  ,K  |C|N,K> = K^2
        <N  ,K  |DK|N,K> = -K^4
        <N  ,K  |DJK|N,K> = -N*(N+1)*K^2
        <N  ,K  |DJ|N,K> = -N^2*(N+1)^2
        <N  ,K-4|deltaK|N,K> = sqrt((N*(N+1)+(-K+1)*(K-2))*(N*(N+1)+(-K+2)*(K-3))*(N*(N+1)+(-K+3)*(K-4))*(N*(N+1)-K*(K-1)))
        <N  ,K+4|deltaK|N,K> = sqrt((N*(N+1)+(-K-1)*(K+2))*(N*(N+1)+(-K-2)*(K+3))*(N*(N+1)+(-K-3)*(K+4))*(N*(N+1)-K*(K+1)))
        <N  ,K-2|deltaJ|N,K> = N*(N+1)*sqrt((N*(N+1)+(-K+1)*(K-2))*(N*(N+1)-K*(K-1)))
        <N  ,K+2|deltaJ|N,K> = N*(N+1)*sqrt((N*(N+1)+(-K-1)*(K+2))*(N*(N+1)-K*(K+1)))
        <N  ,K  |HK|N,K> = K^6
        <N  ,K  |HKJ|N,K> = N*(N+1)*K^4
        <N  ,K  |HJK|N,K> = N^2*(N+1)^2*K^2
        <N  ,K  |HJ|N,K> = N^3*(N+1)^3
        <N  ,K-6|phiK|N,K> = sqrt((N*(N+1)+(-K+1)*(K-2))*(N*(N+1)+(-K+2)*(K-3))*(N*(N+1)+(-K+3)*(K-4))*(N*(N+1)+(-K+4)*(K-5))*(N*(N+1)+(-K+5)*(K-6))*(N*(N+1)-K*(K-1)))
        <N  ,K+6|phiK|N,K> = sqrt((N*(N+1)+(-K-1)*(K+2))*(N*(N+1)+(-K-2)*(K+3))*(N*(N+1)+(-K-3)*(K+4))*(N*(N+1)+(-K-4)*(K+5))*(N*(N+1)+(-K-5)*(K+6))*(N*(N+1)-K*(K+1)))
        <N  ,K-4|phiJK|N,K> = N*(N+1)*sqrt((N*(N+1)+(-K+1)*(K-2))*(N*(N+1)+(-K+2)*(K-3))*(N*(N+1)+(-K+3)*(K-4))*(N*(N+1)-K*(K-1)))
        <N  ,K+4|phiJK|N,K> = N*(N+1)*sqrt((N*(N+1)+(-K-1)*(K+2))*(N*(N+1)+(-K-2)*(K+3))*(N*(N+1)+(-K-3)*(K+4))*(N*(N+1)-K*(K+1)))
        <N  ,K-2|phiJ|N,K> = N^2*(N+1)^2*sqrt((N*(N+1)+(-K+1)*(K-2))*(N*(N+1)-K*(K-1)))
        <N  ,K+2|phiJ|N,K> = N^2*(N+1)^2*sqrt((N*(N+1)+(-K-1)*(K+2))*(N*(N+1)-K*(K+1)))
        <N  ,K  |LKKJ|N,K> = N*(N+1)*K^6
        <N  ,K  |LJK|N,K> = N^2*(N+1)^2*K^4
        <N  ,K  |LJJK|N,K> = N^3*(N+1)^3*K^2
        <N  ,K  |LJ|N,K> = N^4*(N+1)^4
        <N  ,K-6|llKJ|N,K> = N*(N+1)*sqrt((N*(N+1)+(-K+1)*(K-2))*(N*(N+1)+(-K+2)*(K-3))*(N*(N+1)+(-K+3)*(K-4))*(N*(N+1)+(-K+4)*(K-5))*(N*(N+1)+(-K+5)*(K-6))*(N*(N+1)-K*(K-1)))
        <N  ,K+6|llKJ|N,K> = N*(N+1)*sqrt((N*(N+1)+(-K-1)*(K+2))*(N*(N+1)+(-K-2)*(K+3))*(N*(N+1)+(-K-3)*(K+4))*(N*(N+1)+(-K-4)*(K+5))*(N*(N+1)+(-K-5)*(K+6))*(N*(N+1)-K*(K+1)))
        <N  ,K-4|llJK|N,K> = N^2*(N+1)^2*sqrt((N*(N+1)+(-K+1)*(K-2))*(N*(N+1)+(-K+2)*(K-3))*(N*(N+1)+(-K+3)*(K-4))*(N*(N+1)-K*(K-1)))
        <N  ,K+4|llJK|N,K> = N^2*(N+1)^2*sqrt((N*(N+1)+(-K-1)*(K+2))*(N*(N+1)+(-K-2)*(K+3))*(N*(N+1)+(-K-3)*(K+4))*(N*(N+1)-K*(K+1)))
        <N  ,K-2|llJ|N,K> = N^3*(N+1)^3*sqrt((N*(N+1)+(-K+1)*(K-2))*(N*(N+1)-K*(K-1)))
        <N  ,K+2|llJ|N,K> = N^3*(N+1)^3*sqrt((N*(N+1)+(-K-1)*(K+2))*(N*(N+1)-K*(K+1)))
        AsymmetricTop: X v=1
          Symmetry B1
          Kmin     all
          Kmax     all
          Origin 0.17074620102684
          A      7.44463850424816
          B      5.34386570325261
          C      3.753232634358
          DK     0.00021428221853
          DJK    -0.00048566602699
          DJ     0.00033205133866
          deltaK -5.246157393E-5
          deltaJ 0.00011210335985
          HK     -7.52335604119834E-8
          HKJ    1.77525710136444E-7
          HJK    -1.60856561641721E-7
          HJ     6.33245416734266E-8
          phiK   -3.95551445126748E-9
          phiJK  2.39341247870885E-8
          phiJ   -3.82401127649449E-8
          LKKJ   1.29665336677683E-10
          LJK    -1.06206474346996E-10
          LJJK   5.4187470586735E-11
          LJ     -1.84466615234196E-11
          llKJ   2.85383596941588E-12
          llJK   -9.62525081268055E-12
          llJ    1.35698300322152E-11
        <N  ,K-2|A|N,K> = (-sqrt((N*(N+1)+(-K+1)*(K-2))*(N*(N+1)-K*(K-1))))/4
        <N  ,K  |A|N,K> = (N*(N+1)-K^2)/2
        <N  ,K+2|A|N,K> = (-sqrt((N*(N+1)+(-K-1)*(K+2))*(N*(N+1)-K*(K+1))))/4
        <N  ,K-2|B|N,K> = sqrt((N*(N+1)+(-K+1)*(K-2))*(N*(N+1)-K*(K-1)))/4
        <N  ,K  |B|N,K> = (N*(N+1)-K^2)/2
        <N  ,K+2|B|N,K> = sqrt((N*(N+1)+(-K-1)*(K+2))*(N*(N+1)-K*(K+1)))/4
        <N  ,K  |C|N,K> = K^2
        <N  ,K  |DK|N,K> = -K^4
        <N  ,K  |DJK|N,K> = -N*(N+1)*K^2
        <N  ,K  |DJ|N,K> = -N^2*(N+1)^2
        <N  ,K-4|deltaK|N,K> = sqrt((N*(N+1)+(-K+1)*(K-2))*(N*(N+1)+(-K+2)*(K-3))*(N*(N+1)+(-K+3)*(K-4))*(N*(N+1)-K*(K-1)))
        <N  ,K+4|deltaK|N,K> = sqrt((N*(N+1)+(-K-1)*(K+2))*(N*(N+1)+(-K-2)*(K+3))*(N*(N+1)+(-K-3)*(K+4))*(N*(N+1)-K*(K+1)))
        <N  ,K-2|deltaJ|N,K> = N*(N+1)*sqrt((N*(N+1)+(-K+1)*(K-2))*(N*(N+1)-K*(K-1)))
        <N  ,K+2|deltaJ|N,K> = N*(N+1)*sqrt((N*(N+1)+(-K-1)*(K+2))*(N*(N+1)-K*(K+1)))
        <N  ,K  |HK|N,K> = K^6
        <N  ,K  |HKJ|N,K> = N*(N+1)*K^4
        <N  ,K  |HJK|N,K> = N^2*(N+1)^2*K^2
        <N  ,K  |HJ|N,K> = N^3*(N+1)^3
        <N  ,K-6|phiK|N,K> = sqrt((N*(N+1)+(-K+1)*(K-2))*(N*(N+1)+(-K+2)*(K-3))*(N*(N+1)+(-K+3)*(K-4))*(N*(N+1)+(-K+4)*(K-5))*(N*(N+1)+(-K+5)*(K-6))*(N*(N+1)-K*(K-1)))
        <N  ,K+6|phiK|N,K> = sqrt((N*(N+1)+(-K-1)*(K+2))*(N*(N+1)+(-K-2)*(K+3))*(N*(N+1)+(-K-3)*(K+4))*(N*(N+1)+(-K-4)*(K+5))*(N*(N+1)+(-K-5)*(K+6))*(N*(N+1)-K*(K+1)))
        <N  ,K-4|phiJK|N,K> = N*(N+1)*sqrt((N*(N+1)+(-K+1)*(K-2))*(N*(N+1)+(-K+2)*(K-3))*(N*(N+1)+(-K+3)*(K-4))*(N*(N+1)-K*(K-1)))
        <N  ,K+4|phiJK|N,K> = N*(N+1)*sqrt((N*(N+1)+(-K-1)*(K+2))*(N*(N+1)+(-K-2)*(K+3))*(N*(N+1)+(-K-3)*(K+4))*(N*(N+1)-K*(K+1)))
        <N  ,K-2|phiJ|N,K> = N^2*(N+1)^2*sqrt((N*(N+1)+(-K+1)*(K-2))*(N*(N+1)-K*(K-1)))
        <N  ,K+2|phiJ|N,K> = N^2*(N+1)^2*sqrt((N*(N+1)+(-K-1)*(K+2))*(N*(N+1)-K*(K+1)))
        <N  ,K  |LKKJ|N,K> = N*(N+1)*K^6
        <N  ,K  |LJK|N,K> = N^2*(N+1)^2*K^4
        <N  ,K  |LJJK|N,K> = N^3*(N+1)^3*K^2
        <N  ,K  |LJ|N,K> = N^4*(N+1)^4
        <N  ,K-6|llKJ|N,K> = N*(N+1)*sqrt((N*(N+1)+(-K+1)*(K-2))*(N*(N+1)+(-K+2)*(K-3))*(N*(N+1)+(-K+3)*(K-4))*(N*(N+1)+(-K+4)*(K-5))*(N*(N+1)+(-K+5)*(K-6))*(N*(N+1)-K*(K-1)))
        <N  ,K+6|llKJ|N,K> = N*(N+1)*sqrt((N*(N+1)+(-K-1)*(K+2))*(N*(N+1)+(-K-2)*(K+3))*(N*(N+1)+(-K-3)*(K+4))*(N*(N+1)+(-K-4)*(K+5))*(N*(N+1)+(-K-5)*(K+6))*(N*(N+1)-K*(K+1)))
        <N  ,K-4|llJK|N,K> = N^2*(N+1)^2*sqrt((N*(N+1)+(-K+1)*(K-2))*(N*(N+1)+(-K+2)*(K-3))*(N*(N+1)+(-K+3)*(K-4))*(N*(N+1)-K*(K-1)))
        <N  ,K+4|llJK|N,K> = N^2*(N+1)^2*sqrt((N*(N+1)+(-K-1)*(K+2))*(N*(N+1)+(-K-2)*(K+3))*(N*(N+1)+(-K-3)*(K+4))*(N*(N+1)-K*(K+1)))
        <N  ,K-2|llJ|N,K> = N^3*(N+1)^3*sqrt((N*(N+1)+(-K+1)*(K-2))*(N*(N+1)-K*(K-1)))
        <N  ,K+2|llJ|N,K> = N^3*(N+1)^3*sqrt((N*(N+1)+(-K-1)*(K+2))*(N*(N+1)-K*(K+1)))
        AsymmetricTopPerturbation: X <v=1|bc|v=0>
          Value 0.10395943649789
        <N  ,K-1|bc|N,K> = (sqrt(N*(N+1)-K*(K-1))*(2*K-1))/2
        <N  ,K+1|bc|N,K> = (sqrt(N*(N+1)-K*(K+1))*(2*K+1))/2

        AsymmetricTopPerturbation: X <v=1|J^2bc|v=0>
          Value -1.839105638E-5
        <N  ,K-1|J^2bc|N,K> = (N*(N+1)*sqrt(N*(N+1)-K*(K-1))*(2*K-1))/2
        <N  ,K+1|J^2bc|N,K> = (N*(N+1)*sqrt(N*(N+1)-K*(K+1))*(2*K+1))/2

      AsymmetricManifold: B
        Initial       True
        EigenSearch   True
        LimitSearch   True
        AutoQConverge True
        UsePopParams  False
        AsymmetricTop: B A2
          Colour   Navy
          Symmetry B2
          Kmin     all
          Kmax     all
          Origin 61704.5704357369           Float, Increment = 0.1
          A      7.09530075597903           Float, Increment = 0.001
          B      4.74965578536412           Float, Increment = 0.001
          C      3.23495221246063           Float, Increment = 0.001
        <N  ,K-2|A|N,K> = (-sqrt((N*(N+1)+(-K+1)*(K-2))*(N*(N+1)-K*(K-1))))/4
        <N  ,K  |A|N,K> = (N*(N+1)-K^2)/2
        <N  ,K+2|A|N,K> = (-sqrt((N*(N+1)+(-K-1)*(K+2))*(N*(N+1)-K*(K+1))))/4
        <N  ,K-2|B|N,K> = sqrt((N*(N+1)+(-K+1)*(K-2))*(N*(N+1)-K*(K-1)))/4
        <N  ,K  |B|N,K> = (N*(N+1)-K^2)/2
        <N  ,K+2|B|N,K> = sqrt((N*(N+1)+(-K-1)*(K+2))*(N*(N+1)-K*(K+1)))/4
        <N  ,K  |C|N,K> = K^2
        AsymmetricTop: B B1
          Colour   Maroon
          Symmetry A1
          Kmin     all
          Kmax     all
          Origin 61678.2527068705           Float, Increment = 0.1
          A      6.66203074364978           Float, Increment = 0.001
          B      5.0486996975539            Float, Increment = 0.001
          C      3.23495221246063           Float, Increment = 0.001
        <N  ,K-2|A|N,K> = (-sqrt((N*(N+1)+(-K+1)*(K-2))*(N*(N+1)-K*(K-1))))/4
        <N  ,K  |A|N,K> = (N*(N+1)-K^2)/2
        <N  ,K+2|A|N,K> = (-sqrt((N*(N+1)+(-K-1)*(K+2))*(N*(N+1)-K*(K+1))))/4
        <N  ,K-2|B|N,K> = sqrt((N*(N+1)+(-K+1)*(K-2))*(N*(N+1)-K*(K-1)))/4
        <N  ,K  |B|N,K> = (N*(N+1)-K^2)/2
        <N  ,K+2|B|N,K> = sqrt((N*(N+1)+(-K-1)*(K+2))*(N*(N+1)-K*(K+1)))/4
        <N  ,K  |C|N,K> = K^2
        AsymmetricTopPerturbation: B <A2|c|B1>
          Value -5.33202046951915          Float
        <N  ,K  |c|N,K> = K

        AsymmetricTopPerturbation: B <A2|ab|B1>
          Value 0.309715041034215          Float
        <N  ,K-2|ab|N,K> = (-sqrt((-N*(N+1)+(K-1)*(K-2))*(N*(N+1)-K*(K-1))))/2
        <N  ,K+2|ab|N,K> = sqrt((-N*(N+1)+(K+1)*(K+2))*(N*(N+1)-K*(K+1)))/2

      TransitionMoments: <B|mu|X>
        SphericalTransitionMoment: <A2|T(2,1)|v=1>
          Rank      2
          Component 1
          Strength 1
        Reduced Matrix Elements of <A2|T(2,1)|v=1>
        <N-2,K-1|T(2,1)|N,K> = -1^(2*N-2*K-5)*sqrt(((N-K)*(N+K)*(N+K-1)*(N+K-2))/(N*(2*N-1)*(N-1)))
        <N-2,K+1|T(2,1)|N,K> = -1^(2*N-2*K-7)*sqrt(((N-K)*(N-K-1)*(N-K-2)*(N+K))/(N*(2*N-1)*(N-1)))
        <N-1,K-1|T(2,1)|N,K> = -1^(2*N-2*K-3)*(N-2*K+1)*sqrt(((N+K)*(N+K-1))/(2*N*(N-1)*(N+1)))
        <N-1,K+1|T(2,1)|N,K> = -1^(2*N-2*K-5)*(-N-2*K-1)*sqrt(((N-K)*(N-K-1))/(2*N*(N-1)*(N+1)))
        <N  ,K-1|T(2,1)|N,K> = (-1^(2*N-2*K-1)*(2*N+1)*sqrt((6*(N-K+1)*(N+K))/(N*(2*N-1)*(2*N+1)*(2*N+3)*(N+1)))*(-2*K+1))/2
        <N  ,K+1|T(2,1)|N,K> = (-1^(2*N-2*K-3)*(2*N+1)*sqrt((6*(N-K)*(N+K+1))/(N*(2*N-1)*(2*N+1)*(2*N+3)*(N+1)))*(2*K+1))/2
        <N+1,K-1|T(2,1)|N,K> = -1^(2*N-2*K+1)*(-N-2*K)*sqrt(((N-K+1)*(N-K+2))/(2*N*(N+1)*(N+2)))
        <N+1,K+1|T(2,1)|N,K> = -1^(2*N-2*K-1)*(N-2*K)*sqrt(((N+K+1)*(N+K+2))/(2*N*(N+1)*(N+2)))
        <N+2,K-1|T(2,1)|N,K> = -1^(2*(N-K+2))*sqrt(((N-K+1)*(N-K+2)*(N-K+3)*(N+K+1))/((2*N+3)*(N+1)*(N+2)))
        <N+2,K+1|T(2,1)|N,K> = -1^(2*(N-K+1))*sqrt(((N-K+1)*(N+K+1)*(N+K+2)*(N+K+3))/((2*N+3)*(N+1)*(N+2)))
        Line Strengths from <A2|T(2,1)|v=1>
        <N-2,K-1|T(2,1)|N,K> = (-1^(2*(2*N-2*K-5))*(N-K)*(N+K)*(N+K-1)*(N+K-2))/(N*(2*N-1)*(N-1))
        <N-2,K+1|T(2,1)|N,K> = (-1^(2*(2*N-2*K-7))*(N-K)*(N-K-1)*(N-K-2)*(N+K))/(N*(2*N-1)*(N-1))
        <N-1,K-1|T(2,1)|N,K> = (-1^(2*(2*N-2*K-3))*(N-2*K+1)^2*(N+K)*(N+K-1))/(2*N*(N-1)*(N+1))
        <N-1,K+1|T(2,1)|N,K> = (-1^(2*(2*N-2*K-5))*(-N-2*K-1)^2*(N-K)*(N-K-1))/(2*N*(N-1)*(N+1))
        <N  ,K-1|T(2,1)|N,K> = (3*-1^(2*(2*N-2*K-1))*(2*N+1)*(N-K+1)*(N+K)*(-2*K+1)^2)/(2*N*(2*N-1)*(2*N+3)*(N+1))
        <N  ,K+1|T(2,1)|N,K> = (3*-1^(2*(2*N-2*K-3))*(2*N+1)*(N-K)*(N+K+1)*(2*K+1)^2)/(2*N*(2*N-1)*(2*N+3)*(N+1))
        <N+1,K-1|T(2,1)|N,K> = (-1^(2*(2*N-2*K+1))*(-N-2*K)^2*(N-K+1)*(N-K+2))/(2*N*(N+1)*(N+2))
        <N+1,K+1|T(2,1)|N,K> = (-1^(2*(2*N-2*K-1))*(N-2*K)^2*(N+K+1)*(N+K+2))/(2*N*(N+1)*(N+2))
        <N+2,K-1|T(2,1)|N,K> = (-1^(4*(N-K+2))*(N-K+1)*(N-K+2)*(N-K+3)*(N+K+1))/((2*N+3)*(N+1)*(N+2))
        <N+2,K+1|T(2,1)|N,K> = (-1^(4*(N-K+1))*(N-K+1)*(N+K+1)*(N+K+2)*(N+K+3))/((2*N+3)*(N+1)*(N+2))

        SphericalTransitionMoment: <B1|T(2,-1)|v=1>
          Rank      2
          Component -1
          Strength 1
        Reduced Matrix Elements of <B1|T(2,-1)|v=1>
        <N-2,K-1|T(2,-1)|N,K> = -1^(2*(N-K-2))*sqrt(((N-K)*(N+K)*(N+K-1)*(N+K-2))/(N*(2*N-1)*(N-1)))
        <N-2,K+1|T(2,-1)|N,K> = -1^(2*N-2*K-7)*sqrt(((N-K)*(N-K-1)*(N-K-2)*(N+K))/(N*(2*N-1)*(N-1)))
        <N-1,K-1|T(2,-1)|N,K> = -1^(2*(N-K-1))*(N-2*K+1)*sqrt(((N+K)*(N+K-1))/(2*N*(N-1)*(N+1)))
        <N-1,K+1|T(2,-1)|N,K> = -1^(2*N-2*K-5)*(-N-2*K-1)*sqrt(((N-K)*(N-K-1))/(2*N*(N-1)*(N+1)))
        <N  ,K-1|T(2,-1)|N,K> = (-1^(2*(N-K))*(2*N+1)*sqrt((6*(N-K+1)*(N+K))/(N*(2*N-1)*(2*N+1)*(2*N+3)*(N+1)))*(-2*K+1))/2
        <N  ,K+1|T(2,-1)|N,K> = (-1^(2*N-2*K-3)*(2*N+1)*sqrt((6*(N-K)*(N+K+1))/(N*(2*N-1)*(2*N+1)*(2*N+3)*(N+1)))*(2*K+1))/2
        <N+1,K-1|T(2,-1)|N,K> = -1^(2*(N-K+1))*(-N-2*K)*sqrt(((N-K+1)*(N-K+2))/(2*N*(N+1)*(N+2)))
        <N+1,K+1|T(2,-1)|N,K> = -1^(2*N-2*K-1)*(N-2*K)*sqrt(((N+K+1)*(N+K+2))/(2*N*(N+1)*(N+2)))
        <N+2,K-1|T(2,-1)|N,K> = -1^(2*N-2*K+5)*sqrt(((N-K+1)*(N-K+2)*(N-K+3)*(N+K+1))/((2*N+3)*(N+1)*(N+2)))
        <N+2,K+1|T(2,-1)|N,K> = -1^(2*(N-K+1))*sqrt(((N-K+1)*(N+K+1)*(N+K+2)*(N+K+3))/((2*N+3)*(N+1)*(N+2)))
        Line Strengths from <B1|T(2,-1)|v=1>
        <N-2,K-1|T(2,-1)|N,K> = (-1^(4*(N-K-2))*(N-K)*(N+K)*(N+K-1)*(N+K-2))/(N*(2*N-1)*(N-1))
        <N-2,K+1|T(2,-1)|N,K> = (-1^(2*(2*N-2*K-7))*(N-K)*(N-K-1)*(N-K-2)*(N+K))/(N*(2*N-1)*(N-1))
        <N-1,K-1|T(2,-1)|N,K> = (-1^(4*(N-K-1))*(N-2*K+1)^2*(N+K)*(N+K-1))/(2*N*(N-1)*(N+1))
        <N-1,K+1|T(2,-1)|N,K> = (-1^(2*(2*N-2*K-5))*(-N-2*K-1)^2*(N-K)*(N-K-1))/(2*N*(N-1)*(N+1))
        <N  ,K-1|T(2,-1)|N,K> = (3*-1^(4*(N-K))*(2*N+1)*(N-K+1)*(N+K)*(-2*K+1)^2)/(2*N*(2*N-1)*(2*N+3)*(N+1))
        <N  ,K+1|T(2,-1)|N,K> = (3*-1^(2*(2*N-2*K-3))*(2*N+1)*(N-K)*(N+K+1)*(2*K+1)^2)/(2*N*(2*N-1)*(2*N+3)*(N+1))
        <N+1,K-1|T(2,-1)|N,K> = (-1^(4*(N-K+1))*(-N-2*K)^2*(N-K+1)*(N-K+2))/(2*N*(N+1)*(N+2))
        <N+1,K+1|T(2,-1)|N,K> = (-1^(2*(2*N-2*K-1))*(N-2*K)^2*(N+K+1)*(N+K+2))/(2*N*(N+1)*(N+2))
        <N+2,K-1|T(2,-1)|N,K> = (-1^(2*(2*N-2*K+5))*(N-K+1)*(N-K+2)*(N-K+3)*(N+K+1))/((2*N+3)*(N+1)*(N+2))
        <N+2,K+1|T(2,-1)|N,K> = (-1^(4*(N-K+1))*(N-K+1)*(N+K+1)*(N+K+2)*(N+K+3))/((2*N+3)*(N+1)*(N+2))


Residuals before fit for ND2H for the B - X Transition
    J' S' #'    J" S" #"     Observed    Calculated      Obs-Calc StdDev 
    0 E-  1     2 O+  2    61672.0130    61671.9791        0.0339 1       :B A2  0  0  0 - X v=0  2  1  1:: .00189 :   5:ND2H_b3x0.lin
    1 O-  2     1 E+  2    61700.9460    61700.8766        0.0694 1       :B A2  1  0  1 - X v=0  1  1  0:: .00522 :   6:ND2H_b3x0.lin
    1 O-  2     2 E-  1    61685.9420    61685.8930        0.0490 1       :B A2  1  0  1 - X v=0  2  1  2:: .00335 :   7:ND2H_b3x0.lin
    1 O-  2     3 E+  2    61651.8560    61651.9089       -0.0529 1       :B A2  1  0  1 - X v=0  3  1  2:: .00164 :   8:ND2H_b3x0.lin
    1 E-  1     1 O+  1    61707.4500    61707.3183        0.1317 1       :B A2  1  1  0 - X v=0  1  0  1:: .01054 :   9:ND2H_b3x0.lin
    1 E-  1     2 O-  2    61677.5890    61677.5464        0.0426 1       :B A2  1  1  0 - X v=0  2  2  1:: .00136 :  10:ND2H_b3x0.lin
    1 E-  1     3 O+  3    61647.4960    61647.5663       -0.0703 1       :B A2  1  1  0 - X v=0  3  2  1:: .00099 :  11:ND2H_b3x0.lin
    1 O+  2     2 E+  3    61676.2170    61676.3713       -0.1543 1       :B A2  1  1  1 - X v=0  2  2  0:: .00065 :  12:ND2H_b3x0.lin
    1 O+  2     3 E-  2    61649.7170    61649.7206       -0.0036 1       :B A2  1  1  1 - X v=0  3  2  2:: .00051 :  13:ND2H_b3x0.lin
    2 E-  2     1 O-  1    61720.3660    61720.2380        0.1280 1       :B A2  2  0  2 - X v=0  1  1  1:: .00379 :  14:ND2H_b3x0.lin
    2 E-  2     4 O+  2    61631.6440    61631.9072       -0.2632 1       :B A2  2  0  2 - X v=0  4  1  3:: .00018 :  15:ND2H_b3x0.lin
    2 O-  2     0 E+  1    61735.3820    61735.2282        0.1538 1       :B A2  2  1  1 - X v=0  0  0  0:: .00486 :  16:ND2H_b3x0.lin
    2 O-  2     2 E+  1    61708.6030    61708.5717        0.0313 1       :B A2  2  1  1 - X v=0  2  0  2:: .00288 :  17:ND2H_b3x0.lin
    2 E+  3     3 O+  1    61681.3690    61681.3453        0.0237 1       :B A2  2  1  2 - X v=0  3  0  3::  .0035 :  18:ND2H_b3x0.lin
    2 E+  3     4 O-  2    61631.1080    61631.2077       -0.0997 1       :B A2  2  1  2 - X v=0  4  2  3:: .00027 :  19:ND2H_b3x0.lin
    2 E-  3     3 E+  3    61660.6250    61660.7951       -0.1701 1       :B A2  2  2  0 - X v=0  3  3  0::  .0001 :  20:ND2H_b3x0.lin
    2 E-  3     1 O-  1    61730.8460    61730.6733        0.1727 1       :B A2  2  2  0 - X v=0  1  1  1:: .00434 :  21:ND2H_b3x0.lin
    2 E-  3     2 O+  2    61709.3730    61709.2735        0.0995 1       :B A2  2  2  0 - X v=0  2  1  1:: .00131 :  22:ND2H_b3x0.lin
    2 E-  3     3 O-  3    61660.6250    61660.9255       -0.3005 1       :B A2  2  2  0 - X v=0  3  3  1:: .00011 :  23:ND2H_b3x0.lin
    2 E-  3     4 O+  4    61622.4450    61622.5824       -0.1374 1       :B A2  2  2  0 - X v=0  4  3  1:: 5.2e-5 :  24:ND2H_b3x0.lin
    2 O+  2     1 E+  2    61729.2640    61729.0154        0.2486 1       :B A2  2  2  1 - X v=0  1  1  0:: .00335 :  25:ND2H_b3x0.lin
    2 O+  2     2 E-  1    61714.0690    61714.0318        0.0372 1       :B A2  2  2  1 - X v=0  2  1  2:: .00669 :  26:ND2H_b3x0.lin
    2 O+  2     3 E+  3    61660.6250    61660.7418       -0.1168 1       :B A2  2  2  1 - X v=0  3  3  0:: .00039 :  27:ND2H_b3x0.lin
    2 O+  2     4 E-  3    61623.4900    61623.5959       -0.1059 1       :B A2  2  2  1 - X v=0  4  3  2:: .00011 :  28:ND2H_b3x0.lin
    3 O-  3     1 E+  2    61744.4670    61744.3424        0.1246 1       :B A2  3  0  3 - X v=0  1  1  0:: .00137 :  29:ND2H_b3x0.lin
    3 O-  3     2 E-  1    61729.2640    61729.3589       -0.0949 1       :B A2  3  0  3 - X v=0  2  1  2:: .00325 :  30:ND2H_b3x0.lin
    3 E-  2     1 O+  1    61753.8470    61753.8742       -0.0272 1       :B A2  3  1  2 - X v=0  1  0  1::  .0088 :  32:ND2H_b3x0.lin
    3 O-  4     1 E+  2    61756.9450    61756.8768        0.0682 1       :B A2  3  2  1 - X v=0  1  1  0:: .00576 :  33:ND2H_b3x0.lin
    3 O-  4     2 E-  1    61742.0530    61741.8932        0.1598 1       :B A2  3  2  1 - X v=0  2  1  2:: .00268 :  34:ND2H_b3x0.lin
    3 E+  3     3 O-  1    61716.8410    61716.7720        0.0690 1       :B A2  3  2  2 - X v=0  3  1  3:: .00149 :  35:ND2H_b3x0.lin
    3 E-  3     1 O+  1    61772.6000    61772.5377        0.0623 1       :B A2  3  3  0 - X v=0  1  0  1:: .00073 :  36:ND2H_b3x0.lin
    3 E-  3     2 O-  2    61742.8310    61742.7658        0.0652 1       :B A2  3  3  0 - X v=0  2  2  1:: .00373 :  37:ND2H_b3x0.lin
    3 O+  4     2 E+  3    61742.0530    61742.1456       -0.0926 1       :B A2  3  3  1 - X v=0  2  2  0:: .00146 :  38:ND2H_b3x0.lin
    4 O-  2     2 E+  3    61758.8830    61758.9814       -0.0984 1       :B A2  4  1  3 - X v=0  2  2  0:: .00339 :  39:ND2H_b3x0.lin
    4 E-  4     2 O+  2    61773.8590    61773.7732        0.0858 1       :B A2  4  2  2 - X v=0  2  1  1:: .00183 :  40:ND2H_b3x0.lin
    4 O+  3     2 E-  1    61776.3360    61776.4564       -0.1204 1       :B A2  4  2  3 - X v=0  2  1  2:: .00146 :  41:ND2H_b3x0.lin
    5 E-  3     3 O+  1    61791.8630    61791.8879       -0.0249 1       :B A2  5  1  4 - X v=0  3  0  3:: .00066 :  43:ND2H_b3x0.lin
    5 O-  4     3 E+  2    61790.0480    61790.0898       -0.0418 1       :B A2  5  2  3 - X v=0  3  1  2:: .00111 :  44:ND2H_b3x0.lin
    5 O-  6     3 E+  3    61801.5190    61801.4660        0.0530 1       :B A2  5  4  1 - X v=0  3  3  0:: .00015 :  45:ND2H_b3x0.lin
    5 E+  5     3 O-  3    61801.5190    61801.5971       -0.0781 1       :B A2  5  4  2 - X v=0  3  3  1:: 3.8e-5 :  46:ND2H_b3x0.lin
    0 E+  1     2 O-  2    61639.3500    61639.3838       -0.0338 1       :B B1  0  0  0 - X v=0  2  2  1:: .00273 :  49:ND2H_b3x0.lin
    1 O+  1     2 E+  3    61646.0230    61646.0622       -0.0392 1       :B B1  1  0  1 - X v=0  2  2  0:: .00316 :  50:ND2H_b3x0.lin
    1 E+  1     1 O-  1    61678.8060    61678.7719        0.0341 1       :B B1  1  1  0 - X v=0  1  1  1:: .00474 :  51:ND2H_b3x0.lin
    1 E+  1     2 O+  2    61657.4910    61657.3721        0.1189 1       :B B1  1  1  0 - X v=0  2  1  1:: .00095 :  52:ND2H_b3x0.lin
    1 O-  1     1 E+  2    61674.2250    61674.2359       -0.0109 1       :B B1  1  1  1 - X v=0  1  1  0:: .01238 :  53:ND2H_b3x0.lin
    2 E+  1     1 O+  1    61689.3040    61689.5606       -0.2566 1       :B B1  2  0  2 - X v=0  1  0  1::  .0054 :  54:ND2H_b3x0.lin
    2 E+  1     2 O-  2    61659.8300    61659.7887        0.0413 1       :B B1  2  0  2 - X v=0  2  2  1:: .00541 :  55:ND2H_b3x0.lin
    2 E+  1     3 O+  3    61629.7250    61629.8086       -0.0836 1       :B B1  2  0  2 - X v=0  3  2  1:: .00127 :  56:ND2H_b3x0.lin
    2 O+  1     1 E+  2    61694.7390    61694.6730        0.0660 1       :B B1  2  1  1 - X v=0  1  1  0:: .00644 :  57:ND2H_b3x0.lin
    2 O+  1     2 E-  1    61679.7940    61679.6895        0.1045 1       :B B1  2  1  1 - X v=0  2  1  2:: .00349 :  58:ND2H_b3x0.lin
    2 O+  1     3 E+  3    61626.2830    61626.3994       -0.1164 1       :B B1  2  1  1 - X v=0  3  3  0:: .00075 :  59:ND2H_b3x0.lin
    2 E-  1     1 O-  1    61687.9490    61687.8778        0.0712 1       :B B1  2  1  2 - X v=0  1  1  1:: .00474 :  60:ND2H_b3x0.lin
    2 E-  1     2 O+  2    61666.5040    61666.4780        0.0260 1       :B B1  2  1  2 - X v=0  2  1  1:: .00324 :  61:ND2H_b3x0.lin
    2 E+  2     1 O+  1    61704.7210    61704.6735        0.0475 1       :B B1  2  2  0 - X v=0  1  0  1:: .02227 :  62:ND2H_b3x0.lin
    2 O-  1     0 E+  1    61711.8810    61711.8556        0.0254 1       :B B1  2  2  1 - X v=0  0  0  0::  .0132 :  63:ND2H_b3x0.lin
    3 O+  1     3 E-  2    61650.7700    61650.7958       -0.0258 1       :B B1  3  0  3 - X v=0  3  2  2:: .00105 :  64:ND2H_b3x0.lin
    3 E+  1     1 O-  1    61720.7540    61720.9290       -0.1750 1       :B B1  3  1  2 - X v=0  1  1  1:: .00452 :  65:ND2H_b3x0.lin
    3 O-  1     2 E-  1    61689.3040    61689.2393        0.0647 1       :B B1  3  1  3 - X v=0  2  1  2:: .01008 :  66:ND2H_b3x0.lin
    3 O-  1     3 E+  2    61655.2390    61655.2552       -0.0162 1       :B B1  3  1  3 - X v=0  3  1  2:: .00204 :  67:ND2H_b3x0.lin
    3 E-  1     1 O+  1    61724.8950    61724.8627        0.0323 1       :B B1  3  2  2 - X v=0  1  0  1:: .02101 :  68:ND2H_b3x0.lin
    3 E+  2     1 O-  1    61739.0750    61739.0419        0.0331 1       :B B1  3  3  0 - X v=0  1  1  1::  .0077 :  69:ND2H_b3x0.lin
    3 E+  2     2 O+  2    61717.6600    61717.6421        0.0179 1       :B B1  3  3  0 - X v=0  2  1  1:: .00319 :  70:ND2H_b3x0.lin
    3 O-  2     1 E+  2    61736.4460    61736.4114        0.0346 1       :B B1  3  3  1 - X v=0  1  1  0:: .02366 :  71:ND2H_b3x0.lin
    3 O-  2     2 E-  1    61721.1840    61721.4279       -0.2439 1       :B B1  3  3  1 - X v=0  2  1  2::  .0027 :  72:ND2H_b3x0.lin
    4 O+  1     2 E-  1    61734.8850    61734.5356        0.3494 1       :B B1  4  1  3 - X v=0  2  1  2:: .00871 :  73:ND2H_b3x0.lin
    4 E-  2     2 O+  2    61747.9480    61748.0071       -0.0591 1       :B B1  4  3  2 - X v=0  2  1  1:: .00522 :  74:ND2H_b3x0.lin
    4 E+  4     2 O-  2    61760.8300    61760.8670       -0.0370 1       :B B1  4  4  0 - X v=0  2  2  1:: .00781 :  75:ND2H_b3x0.lin
    4 O-  3     2 E+  1    61773.5880    61773.3538        0.2342 1       :B B1  4  4  1 - X v=0  2  0  2:: .00069 :  76:ND2H_b3x0.lin
    5 E-  1     3 O+  1    61746.1280    61746.0993        0.0287 1       :B B1  5  2  4 - X v=0  3  0  3:: .00391 :  77:ND2H_b3x0.lin
    5 O-  2     3 E+  2    61757.9390    61757.9115        0.0275 1       :B B1  5  3  3 - X v=0  3  1  2:: .00303 :  78:ND2H_b3x0.lin
    5 E-  2     3 O+  3    61769.9850    61770.1060       -0.1210 1       :B B1  5  4  2 - X v=0  3  2  1:: .00266 :  79:ND2H_b3x0.lin
    5 E+  4     3 O-  3    61781.3990    61781.4694       -0.0704 1       :B B1  5  5  0 - X v=0  3  3  1::  .0004 :  80:ND2H_b3x0.lin
    5 O-  5     3 E+  3    61781.3990    61781.2438        0.1552 1       :B B1  5  5  1 - X v=0  3  3  0:: .00152 :  81:ND2H_b3x0.lin
    6 O+  1     4 E-  1    61754.9180    61754.8735        0.0445 1       :B B1  6  1  5 - X v=0  4  1  4:: .00089 :  82:ND2H_b3x0.lin
    6 O-  1     4 E+  1    61754.9180    61755.0135       -0.0955 1       :B B1  6  2  5 - X v=0  4  0  4:: .00045 :  83:ND2H_b3x0.lin
    6 E+  4     4 O-  2    61793.4550    61793.4893       -0.0343 1       :B B1  6  4  2 - X v=0  4  2  3:: .00011 :  84:ND2H_b3x0.lin
    6 O+  4     4 E-  3    61793.4550    61793.4557       -0.0007 1       :B B1  6  5  1 - X v=0  4  3  2:: .00019 :  85:ND2H_b3x0.lin

77 Observations,  9 Parameters
Initial Average Error: 0.123298816106081
Predicted New Error:   0.123298816106081
Parameters:
  # Old                 New                 Std Dev   Change/Std Sens    Summary              Name
  1 61704.5704357369    61704.5704357432    .03683223    0.0000  .002043 61704.570(37)        B A2 Origin
  2 7.09530075597903    7.0953007536605     .00850336    0.0000  .000435 7.0953(85)           B A2 A
  3 4.74965578536412    4.74965578489451    .00636181    0.0000  .000357 4.7497(64)           B A2 B
  4 3.23495221246063    3.23495221211346    .00474399    0.0000  .000238 3.2350(47)           B A2 C
  5 61678.2527068705    61678.2527068645    .03807415    0.0000  .002224 61678.253(38)        B B1 Origin
  6 6.66203074364978    6.6620307450805     .00547114    0.0000  .000271 6.6620(55)           B B1 A
  7 5.0486996975539     5.04869969931372    .00632487    0.0000  .000305 5.0487(63)           B B1 B
  8 -5.33202046951915   -5.33202046850656   .01797434    0.0000  .001048 -5.332(18)           B <A2|c|B1> Value
  9 .309715041034215    .309715045250683    .0097459     0.0000  .000466 0.3097(97)           B <A2|ab|B1> Value
Constraints:
NH3.ND2H.B.B1.C := NH3.ND2H.B.A2.C

Correlation Matrix
       1       2       3       4       5       6       7       8       9
  1   1.000
  2  -0.624   1.000
  3  -0.200   0.045   1.000
  4  -0.295   0.095  -0.516   1.000
  5  -0.289   0.310   0.065  -0.051   1.000
  6   0.349  -0.554  -0.270   0.056  -0.522   1.000
  7   0.305  -0.405  -0.117  -0.299  -0.359   0.143   1.000
  8   0.309  -0.067   0.491  -0.620  -0.244   0.025   0.023   1.000
  9   0.395  -0.644  -0.203  -0.134  -0.347   0.611   0.640   0.075   1.000
