# Supplementary material for: Resonance enhanced multiphoton ionization spectroscopy of NHD2via the B1E′′-state
Source: Royal Society of Chemistry journal article supplement (doi:10.1039/c3cp00012e), 2013-01-01
Supplement: c3cp00012e_5.log [file c3cp00012e_5.log]

Pgopher 7.1.294 14 Dec 2012 9:42 32 bit Unicode (Delphi 23/23)
Mixture: ND2H_b5x0.pgo
  Units               cm1
  PrintLevel          Detail
  Precision           4
  BasisOrder          boDiagonal
  QuantumNumberFormat J
  FitCycles           1
  FitDetails          False
  AutoReplot          True
  AllowComplex        True
  NoLineList          False
  ShowEstUnc          False
  ShowDerivatives     False
  SVDlimit            5
  SVDThresh    1E-15
  ScaleChanges 1
  Species: NH3
    Jmax 20
    Concentration 1
    AsymmetricMolecule: ND2H
      JAdjustSym     True
      BlockMatrix    True
      PointGroup     C2v
      Representation IIIl
      SReduction     True
      eeWt           2
      eoWt           1
      oeWt           1
      ooWt           2
      C2zAxis        b
      C2xAxis        c
      PseudoC2v      False
      FakeSym        False
      PhaseAdjust    False
      Abundance 1
      AsymmetricManifold: X
        Initial       True
        EigenSearch   True
        LimitSearch   True
        AutoQConverge True
        UsePopParams  False
        AsymmetricTop: X v=0
          Symmetry A1
          Kmin     all
          Kmax     all
          A      7.44571610800829
          B      5.34422284499232
          C      3.75295877523377
          DK     0.00021649109331
          DJK    -0.00048922453879
          DJ     0.00033360773205
          deltaK -5.270730259E-5
          deltaJ 0.00011290946885
          HK     -8.32558336073952E-8
          HKJ    1.92454444601138E-7
          HJK    -1.7011815220515E-7
          HJ     6.5600286048557E-8
          phiK   -4.38005615204636E-9
          phiJK  2.50100050882534E-8
          phiJ   -3.98168972616383E-8
          LKKJ   1.41721643978115E-10
          LJK    -1.27759418150539E-10
          LJJK   6.55713993979128E-11
          LJ     -2.02633416481745E-11
          llKJ   4.40553144268893E-12
          llJK   -1.1186874154119E-11
          llJ    1.46377911881959E-11
        <N  ,K-2|A|N,K> = (-sqrt((N*(N+1)+(-K+1)*(K-2))*(N*(N+1)-K*(K-1))))/4
        <N  ,K  |A|N,K> = (N*(N+1)-K^2)/2
        <N  ,K+2|A|N,K> = (-sqrt((N*(N+1)+(-K-1)*(K+2))*(N*(N+1)-K*(K+1))))/4
        <N  ,K-2|B|N,K> = sqrt((N*(N+1)+(-K+1)*(K-2))*(N*(N+1)-K*(K-1)))/4
        <N  ,K  |B|N,K> = (N*(N+1)-K^2)/2
        <N  ,K+2|B|N,K> = sqrt((N*(N+1)+(-K-1)*(K+2))*(N*(N+1)-K*(K+1)))/4
        <N  ,K  |C|N,K> = K^2
        <N  ,K  |DK|N,K> = -K^4
        <N  ,K  |DJK|N,K> = -N*(N+1)*K^2
        <N  ,K  |DJ|N,K> = -N^2*(N+1)^2
        <N  ,K-4|deltaK|N,K> = sqrt((N*(N+1)+(-K+1)*(K-2))*(N*(N+1)+(-K+2)*(K-3))*(N*(N+1)+(-K+3)*(K-4))*(N*(N+1)-K*(K-1)))
        <N  ,K+4|deltaK|N,K> = sqrt((N*(N+1)+(-K-1)*(K+2))*(N*(N+1)+(-K-2)*(K+3))*(N*(N+1)+(-K-3)*(K+4))*(N*(N+1)-K*(K+1)))
        <N  ,K-2|deltaJ|N,K> = N*(N+1)*sqrt((N*(N+1)+(-K+1)*(K-2))*(N*(N+1)-K*(K-1)))
        <N  ,K+2|deltaJ|N,K> = N*(N+1)*sqrt((N*(N+1)+(-K-1)*(K+2))*(N*(N+1)-K*(K+1)))
        <N  ,K  |HK|N,K> = K^6
        <N  ,K  |HKJ|N,K> = N*(N+1)*K^4
        <N  ,K  |HJK|N,K> = N^2*(N+1)^2*K^2
        <N  ,K  |HJ|N,K> = N^3*(N+1)^3
        <N  ,K-6|phiK|N,K> = sqrt((N*(N+1)+(-K+1)*(K-2))*(N*(N+1)+(-K+2)*(K-3))*(N*(N+1)+(-K+3)*(K-4))*(N*(N+1)+(-K+4)*(K-5))*(N*(N+1)+(-K+5)*(K-6))*(N*(N+1)-K*(K-1)))
        <N  ,K+6|phiK|N,K> = sqrt((N*(N+1)+(-K-1)*(K+2))*(N*(N+1)+(-K-2)*(K+3))*(N*(N+1)+(-K-3)*(K+4))*(N*(N+1)+(-K-4)*(K+5))*(N*(N+1)+(-K-5)*(K+6))*(N*(N+1)-K*(K+1)))
        <N  ,K-4|phiJK|N,K> = N*(N+1)*sqrt((N*(N+1)+(-K+1)*(K-2))*(N*(N+1)+(-K+2)*(K-3))*(N*(N+1)+(-K+3)*(K-4))*(N*(N+1)-K*(K-1)))
        <N  ,K+4|phiJK|N,K> = N*(N+1)*sqrt((N*(N+1)+(-K-1)*(K+2))*(N*(N+1)+(-K-2)*(K+3))*(N*(N+1)+(-K-3)*(K+4))*(N*(N+1)-K*(K+1)))
        <N  ,K-2|phiJ|N,K> = N^2*(N+1)^2*sqrt((N*(N+1)+(-K+1)*(K-2))*(N*(N+1)-K*(K-1)))
        <N  ,K+2|phiJ|N,K> = N^2*(N+1)^2*sqrt((N*(N+1)+(-K-1)*(K+2))*(N*(N+1)-K*(K+1)))
        <N  ,K  |LKKJ|N,K> = N*(N+1)*K^6
        <N  ,K  |LJK|N,K> = N^2*(N+1)^2*K^4
        <N  ,K  |LJJK|N,K> = N^3*(N+1)^3*K^2
        <N  ,K  |LJ|N,K> = N^4*(N+1)^4
        <N  ,K-6|llKJ|N,K> = N*(N+1)*sqrt((N*(N+1)+(-K+1)*(K-2))*(N*(N+1)+(-K+2)*(K-3))*(N*(N+1)+(-K+3)*(K-4))*(N*(N+1)+(-K+4)*(K-5))*(N*(N+1)+(-K+5)*(K-6))*(N*(N+1)-K*(K-1)))
        <N  ,K+6|llKJ|N,K> = N*(N+1)*sqrt((N*(N+1)+(-K-1)*(K+2))*(N*(N+1)+(-K-2)*(K+3))*(N*(N+1)+(-K-3)*(K+4))*(N*(N+1)+(-K-4)*(K+5))*(N*(N+1)+(-K-5)*(K+6))*(N*(N+1)-K*(K+1)))
        <N  ,K-4|llJK|N,K> = N^2*(N+1)^2*sqrt((N*(N+1)+(-K+1)*(K-2))*(N*(N+1)+(-K+2)*(K-3))*(N*(N+1)+(-K+3)*(K-4))*(N*(N+1)-K*(K-1)))
        <N  ,K+4|llJK|N,K> = N^2*(N+1)^2*sqrt((N*(N+1)+(-K-1)*(K+2))*(N*(N+1)+(-K-2)*(K+3))*(N*(N+1)+(-K-3)*(K+4))*(N*(N+1)-K*(K+1)))
        <N  ,K-2|llJ|N,K> = N^3*(N+1)^3*sqrt((N*(N+1)+(-K+1)*(K-2))*(N*(N+1)-K*(K-1)))
        <N  ,K+2|llJ|N,K> = N^3*(N+1)^3*sqrt((N*(N+1)+(-K-1)*(K+2))*(N*(N+1)-K*(K+1)))
        AsymmetricTop: X v=1
          Symmetry B1
          Kmin     all
          Kmax     all
          Origin 0.17074620102684
          A      7.44463850424816
          B      5.34386570325261
          C      3.753232634358
          DK     0.00021428221853
          DJK    -0.00048566602699
          DJ     0.00033205133866
          deltaK -5.246157393E-5
          deltaJ 0.00011210335985
          HK     -7.52335604119834E-8
          HKJ    1.77525710136444E-7
          HJK    -1.60856561641721E-7
          HJ     6.33245416734266E-8
          phiK   -3.95551445126748E-9
          phiJK  2.39341247870885E-8
          phiJ   -3.82401127649449E-8
          LKKJ   1.29665336677683E-10
          LJK    -1.06206474346996E-10
          LJJK   5.4187470586735E-11
          LJ     -1.84466615234196E-11
          llKJ   2.85383596941588E-12
          llJK   -9.62525081268055E-12
          llJ    1.35698300322152E-11
        <N  ,K-2|A|N,K> = (-sqrt((N*(N+1)+(-K+1)*(K-2))*(N*(N+1)-K*(K-1))))/4
        <N  ,K  |A|N,K> = (N*(N+1)-K^2)/2
        <N  ,K+2|A|N,K> = (-sqrt((N*(N+1)+(-K-1)*(K+2))*(N*(N+1)-K*(K+1))))/4
        <N  ,K-2|B|N,K> = sqrt((N*(N+1)+(-K+1)*(K-2))*(N*(N+1)-K*(K-1)))/4
        <N  ,K  |B|N,K> = (N*(N+1)-K^2)/2
        <N  ,K+2|B|N,K> = sqrt((N*(N+1)+(-K-1)*(K+2))*(N*(N+1)-K*(K+1)))/4
        <N  ,K  |C|N,K> = K^2
        <N  ,K  |DK|N,K> = -K^4
        <N  ,K  |DJK|N,K> = -N*(N+1)*K^2
        <N  ,K  |DJ|N,K> = -N^2*(N+1)^2
        <N  ,K-4|deltaK|N,K> = sqrt((N*(N+1)+(-K+1)*(K-2))*(N*(N+1)+(-K+2)*(K-3))*(N*(N+1)+(-K+3)*(K-4))*(N*(N+1)-K*(K-1)))
        <N  ,K+4|deltaK|N,K> = sqrt((N*(N+1)+(-K-1)*(K+2))*(N*(N+1)+(-K-2)*(K+3))*(N*(N+1)+(-K-3)*(K+4))*(N*(N+1)-K*(K+1)))
        <N  ,K-2|deltaJ|N,K> = N*(N+1)*sqrt((N*(N+1)+(-K+1)*(K-2))*(N*(N+1)-K*(K-1)))
        <N  ,K+2|deltaJ|N,K> = N*(N+1)*sqrt((N*(N+1)+(-K-1)*(K+2))*(N*(N+1)-K*(K+1)))
        <N  ,K  |HK|N,K> = K^6
        <N  ,K  |HKJ|N,K> = N*(N+1)*K^4
        <N  ,K  |HJK|N,K> = N^2*(N+1)^2*K^2
        <N  ,K  |HJ|N,K> = N^3*(N+1)^3
        <N  ,K-6|phiK|N,K> = sqrt((N*(N+1)+(-K+1)*(K-2))*(N*(N+1)+(-K+2)*(K-3))*(N*(N+1)+(-K+3)*(K-4))*(N*(N+1)+(-K+4)*(K-5))*(N*(N+1)+(-K+5)*(K-6))*(N*(N+1)-K*(K-1)))
        <N  ,K+6|phiK|N,K> = sqrt((N*(N+1)+(-K-1)*(K+2))*(N*(N+1)+(-K-2)*(K+3))*(N*(N+1)+(-K-3)*(K+4))*(N*(N+1)+(-K-4)*(K+5))*(N*(N+1)+(-K-5)*(K+6))*(N*(N+1)-K*(K+1)))
        <N  ,K-4|phiJK|N,K> = N*(N+1)*sqrt((N*(N+1)+(-K+1)*(K-2))*(N*(N+1)+(-K+2)*(K-3))*(N*(N+1)+(-K+3)*(K-4))*(N*(N+1)-K*(K-1)))
        <N  ,K+4|phiJK|N,K> = N*(N+1)*sqrt((N*(N+1)+(-K-1)*(K+2))*(N*(N+1)+(-K-2)*(K+3))*(N*(N+1)+(-K-3)*(K+4))*(N*(N+1)-K*(K+1)))
        <N  ,K-2|phiJ|N,K> = N^2*(N+1)^2*sqrt((N*(N+1)+(-K+1)*(K-2))*(N*(N+1)-K*(K-1)))
        <N  ,K+2|phiJ|N,K> = N^2*(N+1)^2*sqrt((N*(N+1)+(-K-1)*(K+2))*(N*(N+1)-K*(K+1)))
        <N  ,K  |LKKJ|N,K> = N*(N+1)*K^6
        <N  ,K  |LJK|N,K> = N^2*(N+1)^2*K^4
        <N  ,K  |LJJK|N,K> = N^3*(N+1)^3*K^2
        <N  ,K  |LJ|N,K> = N^4*(N+1)^4
        <N  ,K-6|llKJ|N,K> = N*(N+1)*sqrt((N*(N+1)+(-K+1)*(K-2))*(N*(N+1)+(-K+2)*(K-3))*(N*(N+1)+(-K+3)*(K-4))*(N*(N+1)+(-K+4)*(K-5))*(N*(N+1)+(-K+5)*(K-6))*(N*(N+1)-K*(K-1)))
        <N  ,K+6|llKJ|N,K> = N*(N+1)*sqrt((N*(N+1)+(-K-1)*(K+2))*(N*(N+1)+(-K-2)*(K+3))*(N*(N+1)+(-K-3)*(K+4))*(N*(N+1)+(-K-4)*(K+5))*(N*(N+1)+(-K-5)*(K+6))*(N*(N+1)-K*(K+1)))
        <N  ,K-4|llJK|N,K> = N^2*(N+1)^2*sqrt((N*(N+1)+(-K+1)*(K-2))*(N*(N+1)+(-K+2)*(K-3))*(N*(N+1)+(-K+3)*(K-4))*(N*(N+1)-K*(K-1)))
        <N  ,K+4|llJK|N,K> = N^2*(N+1)^2*sqrt((N*(N+1)+(-K-1)*(K+2))*(N*(N+1)+(-K-2)*(K+3))*(N*(N+1)+(-K-3)*(K+4))*(N*(N+1)-K*(K+1)))
        <N  ,K-2|llJ|N,K> = N^3*(N+1)^3*sqrt((N*(N+1)+(-K+1)*(K-2))*(N*(N+1)-K*(K-1)))
        <N  ,K+2|llJ|N,K> = N^3*(N+1)^3*sqrt((N*(N+1)+(-K-1)*(K+2))*(N*(N+1)-K*(K+1)))
        AsymmetricTopPerturbation: X <v=1|bc|v=0>
          Value 0.10395943649789
        <N  ,K-1|bc|N,K> = (sqrt(N*(N+1)-K*(K-1))*(2*K-1))/2
        <N  ,K+1|bc|N,K> = (sqrt(N*(N+1)-K*(K+1))*(2*K+1))/2

        AsymmetricTopPerturbation: X <v=1|J^2bc|v=0>
          Value -1.839105638E-5
        <N  ,K-1|J^2bc|N,K> = (N*(N+1)*sqrt(N*(N+1)-K*(K-1))*(2*K-1))/2
        <N  ,K+1|J^2bc|N,K> = (N*(N+1)*sqrt(N*(N+1)-K*(K+1))*(2*K+1))/2

      AsymmetricManifold: B
        Initial       True
        EigenSearch   True
        LimitSearch   True
        AutoQConverge True
        UsePopParams  False
        AsymmetricTop: B A2
          Colour   Navy
          Symmetry B2
          Kmin     all
          Kmax     all
          Origin 63370.3492230456           Float, Increment = 0.1
          A      6.32478482512596           Float, Increment = 0.001
          B      4.50544611222641           Float, Increment = 0.001
          C      3.27869374740015           Float, Increment = 0.001
        <N  ,K-2|A|N,K> = (-sqrt((N*(N+1)+(-K+1)*(K-2))*(N*(N+1)-K*(K-1))))/4
        <N  ,K  |A|N,K> = (N*(N+1)-K^2)/2
        <N  ,K+2|A|N,K> = (-sqrt((N*(N+1)+(-K-1)*(K+2))*(N*(N+1)-K*(K+1))))/4
        <N  ,K-2|B|N,K> = sqrt((N*(N+1)+(-K+1)*(K-2))*(N*(N+1)-K*(K-1)))/4
        <N  ,K  |B|N,K> = (N*(N+1)-K^2)/2
        <N  ,K+2|B|N,K> = sqrt((N*(N+1)+(-K-1)*(K+2))*(N*(N+1)-K*(K+1)))/4
        <N  ,K  |C|N,K> = K^2
        AsymmetricTop: B B1
          Colour   Maroon
          Symmetry A1
          Kmin     all
          Kmax     all
          Origin 63350.4300581184           Float, Increment = 0.1
          A      6.02617837766556           Float, Increment = 0.001
          B      4.77817325239908           Float, Increment = 0.001
          C      3.27869374740015
        <N  ,K-2|A|N,K> = (-sqrt((N*(N+1)+(-K+1)*(K-2))*(N*(N+1)-K*(K-1))))/4
        <N  ,K  |A|N,K> = (N*(N+1)-K^2)/2
        <N  ,K+2|A|N,K> = (-sqrt((N*(N+1)+(-K-1)*(K+2))*(N*(N+1)-K*(K+1))))/4
        <N  ,K-2|B|N,K> = sqrt((N*(N+1)+(-K+1)*(K-2))*(N*(N+1)-K*(K-1)))/4
        <N  ,K  |B|N,K> = (N*(N+1)-K^2)/2
        <N  ,K+2|B|N,K> = sqrt((N*(N+1)+(-K-1)*(K+2))*(N*(N+1)-K*(K+1)))/4
        <N  ,K  |C|N,K> = K^2
        AsymmetricTopPerturbation: B <A2|c|B1>
          Value -5.385081994495            Float
        <N  ,K  |c|N,K> = K

        AsymmetricTopPerturbation: B <A2|ab|B1>
          Value 0.191607538526565          Float
        <N  ,K-2|ab|N,K> = (-sqrt((-N*(N+1)+(K-1)*(K-2))*(N*(N+1)-K*(K-1))))/2
        <N  ,K+2|ab|N,K> = sqrt((-N*(N+1)+(K+1)*(K+2))*(N*(N+1)-K*(K+1)))/2

      TransitionMoments: <B|mu|X>
        SphericalTransitionMoment: <A2|T(2,1)|v=1>
          Rank      2
          Component 1
          Strength 1
        Reduced Matrix Elements of <A2|T(2,1)|v=1>
        <N-2,K-1|T(2,1)|N,K> = -1^(2*N-2*K-5)*sqrt(((N-K)*(N+K)*(N+K-1)*(N+K-2))/(N*(2*N-1)*(N-1)))
        <N-2,K+1|T(2,1)|N,K> = -1^(2*N-2*K-7)*sqrt(((N-K)*(N-K-1)*(N-K-2)*(N+K))/(N*(2*N-1)*(N-1)))
        <N-1,K-1|T(2,1)|N,K> = -1^(2*N-2*K-3)*(N-2*K+1)*sqrt(((N+K)*(N+K-1))/(2*N*(N-1)*(N+1)))
        <N-1,K+1|T(2,1)|N,K> = -1^(2*N-2*K-5)*(-N-2*K-1)*sqrt(((N-K)*(N-K-1))/(2*N*(N-1)*(N+1)))
        <N  ,K-1|T(2,1)|N,K> = (-1^(2*N-2*K-1)*(2*N+1)*sqrt((6*(N-K+1)*(N+K))/(N*(2*N-1)*(2*N+1)*(2*N+3)*(N+1)))*(-2*K+1))/2
        <N  ,K+1|T(2,1)|N,K> = (-1^(2*N-2*K-3)*(2*N+1)*sqrt((6*(N-K)*(N+K+1))/(N*(2*N-1)*(2*N+1)*(2*N+3)*(N+1)))*(2*K+1))/2
        <N+1,K-1|T(2,1)|N,K> = -1^(2*N-2*K+1)*(-N-2*K)*sqrt(((N-K+1)*(N-K+2))/(2*N*(N+1)*(N+2)))
        <N+1,K+1|T(2,1)|N,K> = -1^(2*N-2*K-1)*(N-2*K)*sqrt(((N+K+1)*(N+K+2))/(2*N*(N+1)*(N+2)))
        <N+2,K-1|T(2,1)|N,K> = -1^(2*(N-K+2))*sqrt(((N-K+1)*(N-K+2)*(N-K+3)*(N+K+1))/((2*N+3)*(N+1)*(N+2)))
        <N+2,K+1|T(2,1)|N,K> = -1^(2*(N-K+1))*sqrt(((N-K+1)*(N+K+1)*(N+K+2)*(N+K+3))/((2*N+3)*(N+1)*(N+2)))
        Line Strengths from <A2|T(2,1)|v=1>
        <N-2,K-1|T(2,1)|N,K> = (-1^(2*(2*N-2*K-5))*(N-K)*(N+K)*(N+K-1)*(N+K-2))/(N*(2*N-1)*(N-1))
        <N-2,K+1|T(2,1)|N,K> = (-1^(2*(2*N-2*K-7))*(N-K)*(N-K-1)*(N-K-2)*(N+K))/(N*(2*N-1)*(N-1))
        <N-1,K-1|T(2,1)|N,K> = (-1^(2*(2*N-2*K-3))*(N-2*K+1)^2*(N+K)*(N+K-1))/(2*N*(N-1)*(N+1))
        <N-1,K+1|T(2,1)|N,K> = (-1^(2*(2*N-2*K-5))*(-N-2*K-1)^2*(N-K)*(N-K-1))/(2*N*(N-1)*(N+1))
        <N  ,K-1|T(2,1)|N,K> = (3*-1^(2*(2*N-2*K-1))*(2*N+1)*(N-K+1)*(N+K)*(-2*K+1)^2)/(2*N*(2*N-1)*(2*N+3)*(N+1))
        <N  ,K+1|T(2,1)|N,K> = (3*-1^(2*(2*N-2*K-3))*(2*N+1)*(N-K)*(N+K+1)*(2*K+1)^2)/(2*N*(2*N-1)*(2*N+3)*(N+1))
        <N+1,K-1|T(2,1)|N,K> = (-1^(2*(2*N-2*K+1))*(-N-2*K)^2*(N-K+1)*(N-K+2))/(2*N*(N+1)*(N+2))
        <N+1,K+1|T(2,1)|N,K> = (-1^(2*(2*N-2*K-1))*(N-2*K)^2*(N+K+1)*(N+K+2))/(2*N*(N+1)*(N+2))
        <N+2,K-1|T(2,1)|N,K> = (-1^(4*(N-K+2))*(N-K+1)*(N-K+2)*(N-K+3)*(N+K+1))/((2*N+3)*(N+1)*(N+2))
        <N+2,K+1|T(2,1)|N,K> = (-1^(4*(N-K+1))*(N-K+1)*(N+K+1)*(N+K+2)*(N+K+3))/((2*N+3)*(N+1)*(N+2))

        SphericalTransitionMoment: <B1|T(2,-1)|v=1>
          Rank      2
          Component -1
          Strength 1
        Reduced Matrix Elements of <B1|T(2,-1)|v=1>
        <N-2,K-1|T(2,-1)|N,K> = -1^(2*(N-K-2))*sqrt(((N-K)*(N+K)*(N+K-1)*(N+K-2))/(N*(2*N-1)*(N-1)))
        <N-2,K+1|T(2,-1)|N,K> = -1^(2*N-2*K-7)*sqrt(((N-K)*(N-K-1)*(N-K-2)*(N+K))/(N*(2*N-1)*(N-1)))
        <N-1,K-1|T(2,-1)|N,K> = -1^(2*(N-K-1))*(N-2*K+1)*sqrt(((N+K)*(N+K-1))/(2*N*(N-1)*(N+1)))
        <N-1,K+1|T(2,-1)|N,K> = -1^(2*N-2*K-5)*(-N-2*K-1)*sqrt(((N-K)*(N-K-1))/(2*N*(N-1)*(N+1)))
        <N  ,K-1|T(2,-1)|N,K> = (-1^(2*(N-K))*(2*N+1)*sqrt((6*(N-K+1)*(N+K))/(N*(2*N-1)*(2*N+1)*(2*N+3)*(N+1)))*(-2*K+1))/2
        <N  ,K+1|T(2,-1)|N,K> = (-1^(2*N-2*K-3)*(2*N+1)*sqrt((6*(N-K)*(N+K+1))/(N*(2*N-1)*(2*N+1)*(2*N+3)*(N+1)))*(2*K+1))/2
        <N+1,K-1|T(2,-1)|N,K> = -1^(2*(N-K+1))*(-N-2*K)*sqrt(((N-K+1)*(N-K+2))/(2*N*(N+1)*(N+2)))
        <N+1,K+1|T(2,-1)|N,K> = -1^(2*N-2*K-1)*(N-2*K)*sqrt(((N+K+1)*(N+K+2))/(2*N*(N+1)*(N+2)))
        <N+2,K-1|T(2,-1)|N,K> = -1^(2*N-2*K+5)*sqrt(((N-K+1)*(N-K+2)*(N-K+3)*(N+K+1))/((2*N+3)*(N+1)*(N+2)))
        <N+2,K+1|T(2,-1)|N,K> = -1^(2*(N-K+1))*sqrt(((N-K+1)*(N+K+1)*(N+K+2)*(N+K+3))/((2*N+3)*(N+1)*(N+2)))
        Line Strengths from <B1|T(2,-1)|v=1>
        <N-2,K-1|T(2,-1)|N,K> = (-1^(4*(N-K-2))*(N-K)*(N+K)*(N+K-1)*(N+K-2))/(N*(2*N-1)*(N-1))
        <N-2,K+1|T(2,-1)|N,K> = (-1^(2*(2*N-2*K-7))*(N-K)*(N-K-1)*(N-K-2)*(N+K))/(N*(2*N-1)*(N-1))
        <N-1,K-1|T(2,-1)|N,K> = (-1^(4*(N-K-1))*(N-2*K+1)^2*(N+K)*(N+K-1))/(2*N*(N-1)*(N+1))
        <N-1,K+1|T(2,-1)|N,K> = (-1^(2*(2*N-2*K-5))*(-N-2*K-1)^2*(N-K)*(N-K-1))/(2*N*(N-1)*(N+1))
        <N  ,K-1|T(2,-1)|N,K> = (3*-1^(4*(N-K))*(2*N+1)*(N-K+1)*(N+K)*(-2*K+1)^2)/(2*N*(2*N-1)*(2*N+3)*(N+1))
        <N  ,K+1|T(2,-1)|N,K> = (3*-1^(2*(2*N-2*K-3))*(2*N+1)*(N-K)*(N+K+1)*(2*K+1)^2)/(2*N*(2*N-1)*(2*N+3)*(N+1))
        <N+1,K-1|T(2,-1)|N,K> = (-1^(4*(N-K+1))*(-N-2*K)^2*(N-K+1)*(N-K+2))/(2*N*(N+1)*(N+2))
        <N+1,K+1|T(2,-1)|N,K> = (-1^(2*(2*N-2*K-1))*(N-2*K)^2*(N+K+1)*(N+K+2))/(2*N*(N+1)*(N+2))
        <N+2,K-1|T(2,-1)|N,K> = (-1^(2*(2*N-2*K+5))*(N-K+1)*(N-K+2)*(N-K+3)*(N+K+1))/((2*N+3)*(N+1)*(N+2))
        <N+2,K+1|T(2,-1)|N,K> = (-1^(4*(N-K+1))*(N-K+1)*(N+K+1)*(N+K+2)*(N+K+3))/((2*N+3)*(N+1)*(N+2))


Residuals before fit for ND2H for the B - X Transition
    J' S' #'    J" S" #"     Observed    Calculated      Obs-Calc StdDev 
    0 E-  1     2 O+  2    63337.7750    63337.7579        0.0171 1       :B A2  0  0  0 - X v=0  2  1  1:: .00189 :   7:ND2H_b5x0.lin
    1 O-  2     1 E+  2    63366.7160    63366.7992       -0.0832 1       :B A2  1  0  1 - X v=0  1  1  0:: .00433 :   8:ND2H_b5x0.lin
    1 O-  2     2 E-  1    63351.9200    63351.8156        0.1044 1       :B A2  1  0  1 - X v=0  2  1  2:: .00359 :   9:ND2H_b5x0.lin
    1 E-  1     1 O+  1    63371.9610    63372.0824       -0.1214 1       :B A2  1  1  0 - X v=0  1  0  1:: .01054 :  10:ND2H_b5x0.lin
    1 E-  1     2 O-  2    63342.2470    63342.3105       -0.0635 1       :B A2  1  1  0 - X v=0  2  2  1:: .00136 :  11:ND2H_b5x0.lin
    1 O+  2     2 E+  1    63354.5850    63354.5729        0.0121 1       :B A2  1  1  1 - X v=0  2  0  2:: .00296 :  13:ND2H_b5x0.lin
    2 E-  2     1 O-  1    63386.2760    63386.2662        0.0098 1       :B A2  2  0  2 - X v=0  1  1  1:: .00407 :  15:ND2H_b5x0.lin
    2 O-  2     0 E+  1    63399.6890    63399.6898       -0.0008 1       :B A2  2  1  1 - X v=0  0  0  0:: .00382 :  16:ND2H_b5x0.lin
    2 O-  2     2 E+  1    63373.0290    63373.0333       -0.0043 1       :B A2  2  1  1 - X v=0  2  0  2:: .00318 :  17:ND2H_b5x0.lin
    2 E+  3     3 O+  1    63347.1790    63347.1996       -0.0206 1       :B A2  2  1  2 - X v=0  3  0  3:: .00359 :  18:ND2H_b5x0.lin
    2 O+  2     1 E+  2    63391.8900    63391.7765        0.1135 1       :B A2  2  2  1 - X v=0  1  1  0:: .00291 :  21:ND2H_b5x0.lin
    2 O+  2     2 E-  1    63376.6980    63376.7929       -0.0949 1       :B A2  2  2  1 - X v=0  2  1  2:: .00717 :  22:ND2H_b5x0.lin
    3 O-  3     2 E-  1    63395.7980    63395.6309        0.1671 1       :B A2  3  0  3 - X v=0  2  1  2:: .00391 :  24:ND2H_b5x0.lin
    3 E-  2     1 O+  1    63417.7830    63417.6794        0.1036 1       :B A2  3  1  2 - X v=0  1  0  1:: .00714 :  25:ND2H_b5x0.lin
    3 E-  2     2 O-  2    63387.9980    63387.9076        0.0904 1       :B A2  3  1  2 - X v=0  2  2  1:: .00186 :  26:ND2H_b5x0.lin
    3 E-  2     3 O+  1    63374.7360    63374.9067       -0.1707 1       :B A2  3  1  2 - X v=0  3  0  3:: .00243 :  27:ND2H_b5x0.lin
    3 O-  4     1 E+  2    63419.2690    63418.9683        0.3007 1       :B A2  3  2  1 - X v=0  1  1  0:: .00391 :  28:ND2H_b5x0.lin
    3 O-  4     2 E-  1    63403.9440    63403.9848       -0.0408 1       :B A2  3  2  1 - X v=0  2  1  2:: .00295 :  29:ND2H_b5x0.lin
    3 O-  4     3 E+  2    63369.8990    63370.0007       -0.1017 1       :B A2  3  2  1 - X v=0  3  1  2:: .00102 :  30:ND2H_b5x0.lin
    3 E+  3     3 O-  1    63379.4350    63379.5124       -0.0774 1       :B A2  3  2  2 - X v=0  3  1  3:: .00163 :  31:ND2H_b5x0.lin
    3 E-  3     1 O+  1    63431.3920    63431.2392        0.1528 1       :B A2  3  3  0 - X v=0  1  0  1::  .0007 :  32:ND2H_b5x0.lin
    3 O+  4     2 E+  1    63413.6100    63413.7296       -0.1196 1       :B A2  3  3  1 - X v=0  2  0  2:: .00088 :  33:ND2H_b5x0.lin
    4 O-  3     2 E+  1    63436.0880    63436.4320       -0.3440 1       :B A2  4  1  3 - X v=0  2  0  2:: .00108 :  34:ND2H_b5x0.lin
    4 E-  4     2 O+  2    63434.7800    63434.6381        0.1419 1       :B A2  4  2  2 - X v=0  2  1  1:: .00149 :  35:ND2H_b5x0.lin
    4 O+  3     2 E-  1    63438.7680    63438.7697       -0.0017 1       :B A2  4  2  3 - X v=0  2  1  2:: .00114 :  36:ND2H_b5x0.lin
    4 E-  5     3 E+  3    63407.7550    63407.7347        0.0203 1       :B A2  4  4  0 - X v=0  3  3  0:: .00018 :  37:ND2H_b5x0.lin
    4 E-  5     3 O-  3    63407.7550    63407.8652       -0.1102 1       :B A2  4  4  0 - X v=0  3  3  1::  .0002 :  38:ND2H_b5x0.lin
    4 O+  4     3 E+  3    63407.7550    63407.7481        0.0069 1       :B A2  4  4  1 - X v=0  3  3  0:: .00071 :  39:ND2H_b5x0.lin
    1 E+  1     1 O-  1    63350.0840    63350.0429        0.0411 1       :B B1  1  1  0 - X v=0  1  1  1:: .00474 :  45:ND2H_b5x0.lin
    1 O-  1     1 E+  2    63345.5470    63345.4768        0.0702 1       :B B1  1  1  1 - X v=0  1  1  0:: .01321 :  47:ND2H_b5x0.lin
    2 E+  1     1 O+  1    63360.2470    63360.2497       -0.0027 1       :B B1  2  0  2 - X v=0  1  0  1:: .00646 :  48:ND2H_b5x0.lin
    2 O+  1     1 E+  2    63364.9800    63364.9113        0.0687 1       :B B1  2  1  1 - X v=0  1  1  0:: .00687 :  50:ND2H_b5x0.lin
    2 O+  1     2 E-  1    63350.0840    63349.9278        0.1562 1       :B B1  2  1  1 - X v=0  2  1  2:: .00307 :  51:ND2H_b5x0.lin
    2 E-  1     1 O-  1    63358.4190    63358.3925        0.0265 1       :B B1  2  1  2 - X v=0  1  1  1:: .00507 :  53:ND2H_b5x0.lin
    2 E-  1     2 O+  2    63337.1670    63336.9927        0.1743 1       :B B1  2  1  2 - X v=0  2  1  1:: .00339 :  54:ND2H_b5x0.lin
    2 E+  2     1 O+  1    63373.8090    63373.9733       -0.1643 1       :B B1  2  2  0 - X v=0  1  0  1:: .02179 :  55:ND2H_b5x0.lin
    2 O-  1     0 E+  1    63380.8190    63380.8763       -0.0573 1       :B B1  2  2  1 - X v=0  0  0  0:: .01431 :  56:ND2H_b5x0.lin
    3 O+  1     2 E+  1    63360.2470    63360.1683        0.0787 1       :B B1  3  0  3 - X v=0  2  0  2:: .00461 :  57:ND2H_b5x0.lin
    3 E+  1     1 O-  1    63389.7140    63389.4891        0.2249 1       :B B1  3  1  2 - X v=0  1  1  1:: .00553 :  60:ND2H_b5x0.lin
    3 O-  1     2 E-  1    63358.9880    63359.0781       -0.0901 1       :B B1  3  1  3 - X v=0  2  1  2::  .0106 :  62:ND2H_b5x0.lin
    3 O+  2     2 E+  1    63381.6450    63381.9467       -0.3017 1       :B B1  3  2  1 - X v=0  2  0  2:: .00349 :  64:ND2H_b5x0.lin
    3 E-  1     1 O+  1    63392.7260    63392.6679        0.0581 1       :B B1  3  2  2 - X v=0  1  0  1::  .0227 :  65:ND2H_b5x0.lin
    3 E-  1     3 O+  3    63332.7860    63332.9159       -0.1299 1       :B B1  3  2  2 - X v=0  3  2  1:: .00067 :  66:ND2H_b5x0.lin
    3 E+  2     1 O-  1    63405.0310    63405.1022       -0.0712 1       :B B1  3  3  0 - X v=0  1  1  1:: .00733 :  67:ND2H_b5x0.lin
    3 E+  2     2 O+  2    63383.5520    63383.7024       -0.1504 1       :B B1  3  3  0 - X v=0  2  1  1:: .00337 :  68:ND2H_b5x0.lin
    3 O-  2     1 E+  2    63401.9830    63402.0315       -0.0485 1       :B B1  3  3  1 - X v=0  1  1  0::  .0264 :  69:ND2H_b5x0.lin
    3 O-  2     2 E-  1    63386.9680    63387.0479       -0.0799 1       :B B1  3  3  1 - X v=0  2  1  2:: .00186 :  70:ND2H_b5x0.lin
    4 E+  1     3 O+  1    63358.4190    63358.4419       -0.0229 1       :B B1  4  0  4 - X v=0  3  0  3:: .00534 :  71:ND2H_b5x0.lin
    4 O+  1     2 E-  1    63401.5130    63401.2593        0.2537 1       :B B1  4  1  3 - X v=0  2  1  2:: .00967 :  72:ND2H_b5x0.lin
    4 O+  2     2 E-  1    63422.3890    63422.3218        0.0672 1       :B B1  4  3  1 - X v=0  2  1  2::  .0026 :  73:ND2H_b5x0.lin
    4 O+  2     3 E+  2    63388.4640    63388.3377        0.1263 1       :B B1  4  3  1 - X v=0  3  1  2::  .0023 :  74:ND2H_b5x0.lin
    4 E-  2     2 O+  2    63411.9500    63412.1333       -0.1833 1       :B B1  4  3  2 - X v=0  2  1  1::  .0058 :  75:ND2H_b5x0.lin
    4 E+  4     2 O-  2    63422.3890    63422.4761       -0.0871 1       :B B1  4  4  0 - X v=0  2  2  1:: .00733 :  76:ND2H_b5x0.lin
    4 O-  2     2 E+  3    63420.2190    63420.1387        0.0803 1       :B B1  4  4  1 - X v=0  2  2  0:: .00507 :  77:ND2H_b5x0.lin
    5 O+  1     4 E+  1    63355.5850    63355.6850       -0.1000 1       :B B1  5  0  5 - X v=0  4  0  4:: .00085 :  78:ND2H_b5x0.lin
    5 O-  1     4 E-  1    63355.5850    63355.5376        0.0474 1       :B B1  5  1  5 - X v=0  4  1  4:: .00172 :  79:ND2H_b5x0.lin
    5 E-  1     3 O+  1    63411.2140    63411.2853       -0.0713 1       :B B1  5  2  4 - X v=0  3  0  3:: .00402 :  80:ND2H_b5x0.lin
    5 O-  2     3 E+  2    63420.2190    63420.2678       -0.0488 1       :B B1  5  3  3 - X v=0  3  1  2:: .00323 :  81:ND2H_b5x0.lin
    5 E-  2     3 O+  3    63429.3840    63429.4391       -0.0551 1       :B B1  5  4  2 - X v=0  3  2  1:: .00284 :  82:ND2H_b5x0.lin
    5 E+  4     3 E+  3    63437.4300    63437.2714        0.1586 1       :B B1  5  5  0 - X v=0  3  3  0:: .00036 :  83:ND2H_b5x0.lin
    5 E+  4     3 O-  3    63437.4300    63437.4019        0.0281 1       :B B1  5  5  0 - X v=0  3  3  1:: .00039 :  84:ND2H_b5x0.lin
    5 O-  5     3 E+  3    63437.4300    63437.3096        0.1204 1       :B B1  5  5  1 - X v=0  3  3  0:: .00135 :  85:ND2H_b5x0.lin

62 Observations,  9 Parameters
Initial Average Error: 0.133067347755315
Predicted New Error:   0.133067347755298
Parameters:
  # Old                 New                 Std Dev   Change/Std Sens    Summary              Name
  1 63370.3492230456    63370.3492230737    .05231978    0.0000  .002393 63370.349(52)        B A2 Origin
  2 6.32478482512596    6.3247848122801     .00657592    0.0000  .000368 6.3248(66)           B A2 A
  3 4.50544611222641    4.50544610239442    .00923619    0.0000  .000457 4.5054(92)           B A2 B
  4 3.27869374740015    3.27869374646715    .0055275     0.0000  .000235 3.2787(55)           B A2 C
  5 63350.4300581184    63350.4300579906    .06423778    0.0000  .002356 63350.430(64)        B B1 Origin
  6 6.02617837766556    6.02617841353209    .01090799    0.0000  .000279 6.026(11)            B B1 A
  7 4.77817325239908    4.77817327060041    .00951797    0.0000  .000395 4.7782(95)           B B1 B
  8 -5.385081994495     -5.38508197390458   .02259417    0.0000  .000965 -5.385(23)           B <A2|c|B1> Value
  9 .191607538526565    .191607673517208    .03695898    0.0000  .001034 0.192(37)            B <A2|ab|B1> Value
Constraints:
NH3.ND2H.B.B1.C := NH3.ND2H.B.A2.C

Correlation Matrix
       1       2       3       4       5       6       7       8       9
  1   1.000
  2  -0.524   1.000
  3  -0.406   0.212   1.000
  4  -0.341   0.075  -0.378   1.000
  5  -0.266   0.385   0.177  -0.028   1.000
  6   0.183  -0.531  -0.342   0.026  -0.622   1.000
  7   0.160  -0.324  -0.228  -0.031  -0.650   0.352   1.000
  8   0.378  -0.187   0.297  -0.753  -0.318   0.219   0.091   1.000
  9   0.129  -0.524  -0.270  -0.043  -0.537   0.887   0.527   0.244   1.000
