# Supplementary material for: Resonance enhanced multiphoton ionization spectroscopy of NHD2via the B1E′′-state
Source: Royal Society of Chemistry journal article supplement (doi:10.1039/c3cp00012e), 2013-01-01
Supplement: c3cp00012e_5.pgo [file c3cp00012e_5.pgo]

<?xml version="1.0"?>
<Mixture BasisOrder="boDiagonal" AllowComplex="True" PrintLevel="plDetail" Version="Pgopher 7.1.294 14 Dec 2012 9:42 32 bit Unicode (Delphi 23/23)" ShowParts="True" ShowSum="False">
  <Species Name="NH3" Jmax="40">
    <AsymmetricMolecule Name="ND2H" SReduction="True" C2zAxis="b" PointGroup="C2v" Representation="IIIl" eeWt="2" ooWt="2">
      <AsymmetricManifold Name="X" Initial="True">
        <AsymmetricTop Name="v=0">
          <Parameter Name="A" Value="7.44571610800829"/>
          <Parameter Name="B" Value="5.34422284499232"/>
          <Parameter Name="C" Value="3.75295877523377"/>
          <Parameter Name="DK" Value="0.00021649109331"/>
          <Parameter Name="DJK" Value="-0.00048922453879"/>
          <Parameter Name="DJ" Value="0.00033360773205"/>
          <Parameter Name="deltaK" Value="-5.270730259E-5"/>
          <Parameter Name="deltaJ" Value="0.00011290946885"/>
          <Parameter Name="HK" Value="-8.32558336073952E-8"/>
          <Parameter Name="HKJ" Value="1.92454444601138E-7"/>
          <Parameter Name="HJK" Value="-1.7011815220515E-7"/>
          <Parameter Name="HJ" Value="6.5600286048557E-8"/>
          <Parameter Name="phiK" Value="-4.38005615204636E-9"/>
          <Parameter Name="phiJK" Value="2.50100050882534E-8"/>
          <Parameter Name="phiJ" Value="-3.98168972616383E-8"/>
          <Parameter Name="LKKJ" Value="1.41721643978115E-10"/>
          <Parameter Name="LJK" Value="-1.27759418150539E-10"/>
          <Parameter Name="LJJK" Value="6.55713993979128E-11"/>
          <Parameter Name="LJ" Value="-2.02633416481745E-11"/>
          <Parameter Name="llKJ" Value="4.40553144268893E-12"/>
          <Parameter Name="llJK" Value="-1.1186874154119E-11"/>
          <Parameter Name="llJ" Value="1.46377911881959E-11"/>
        </AsymmetricTop>
        <AsymmetricTop Name="v=1" Symmetry="B1">
          <Parameter Name="Origin" Value="0.17074620102684"/>
          <Parameter Name="A" Value="7.44463850424816"/>
          <Parameter Name="B" Value="5.34386570325261"/>
          <Parameter Name="C" Value="3.753232634358"/>
          <Parameter Name="DK" Value="0.00021428221853"/>
          <Parameter Name="DJK" Value="-0.00048566602699"/>
          <Parameter Name="DJ" Value="0.00033205133866"/>
          <Parameter Name="deltaK" Value="-5.246157393E-5"/>
          <Parameter Name="deltaJ" Value="0.00011210335985"/>
          <Parameter Name="HK" Value="-7.52335604119834E-8"/>
          <Parameter Name="HKJ" Value="1.77525710136444E-7"/>
          <Parameter Name="HJK" Value="-1.60856561641721E-7"/>
          <Parameter Name="HJ" Value="6.33245416734266E-8"/>
          <Parameter Name="phiK" Value="-3.95551445126748E-9"/>
          <Parameter Name="phiJK" Value="2.39341247870885E-8"/>
          <Parameter Name="phiJ" Value="-3.82401127649449E-8"/>
          <Parameter Name="LKKJ" Value="1.29665336677683E-10"/>
          <Parameter Name="LJK" Value="-1.06206474346996E-10"/>
          <Parameter Name="LJJK" Value="5.4187470586735E-11"/>
          <Parameter Name="LJ" Value="-1.84466615234196E-11"/>
          <Parameter Name="llKJ" Value="2.85383596941588E-12"/>
          <Parameter Name="llJK" Value="-9.62525081268055E-12"/>
          <Parameter Name="llJ" Value="1.35698300322152E-11"/>
        </AsymmetricTop>
        <AsymmetricTopPerturbation bPower="1" cPower="1" Bra="v=1" Ket="v=0">
          <Parameter Name="Value" Value="0.10395943649789"/>
        </AsymmetricTopPerturbation>
        <AsymmetricTopPerturbation JPower="2" bPower="1" cPower="1" Bra="v=1" Ket="v=0">
          <Parameter Name="Value" Value="-1.839105638E-5"/>
        </AsymmetricTopPerturbation>
      </AsymmetricManifold>
      <AsymmetricManifold Name="B" Initial="True">
        <AsymmetricTop Name="A2" Symmetry="B2" Colour="Navy">
          <Parameter Name="Origin" Value="60108.9889439547" Float="true" Increment="0.518657960653373" StdDev="0.0457090945093529"/>
          <Parameter Name="A" Value="7.96694441292521" Float="true" Increment="0.130016588284358" StdDev="0.0056795384532746"/>
          <Parameter Name="B" Value="5.01534102816885" Float="true" Increment="0.0926255991997841" StdDev="0.00905443709988743"/>
          <Parameter Name="C" Value="3.1594383543455" Float="true" Increment="0.0786329744075143" StdDev="0.00672152801431383"/>
        </AsymmetricTop>
        <AsymmetricTop Name="B1" Colour="Maroon">
          <Parameter Name="Origin" Value="60076.8595291316" Float="true" Increment="0.421252634406853" StdDev="0.0574138761543707"/>
          <Parameter Name="A" Value="7.31319960674704" Float="true" Increment="0.0786286558622293" StdDev="0.00789975743111548"/>
          <Parameter Name="B" Value="5.3802307202055" Float="true" Increment="0.120508799188522" StdDev="0.0080009879499337"/>
          <Parameter Name="C" Value="3.1594383543455" Float="true" Increment="0.001"/>
        </AsymmetricTop>
        <AsymmetricTopPerturbation cPower="1" Bra="A2" Ket="B1">
          <Parameter Name="Value" Value="-5.28188581453238" Float="true" Increment="0.292001309883553" StdDev="0.0293414586467047"/>
        </AsymmetricTopPerturbation>
        <AsymmetricTopPerturbation aPower="1" bPower="1" Bra="A2" Ket="B1">
          <Parameter Name="Value" Value="0.408927239808417" Float="true" StdDev="0.0156179615283786"/>
        </AsymmetricTopPerturbation>
      </AsymmetricManifold>
      <TransitionMoments Bra="B" Ket="X">
        <SphericalTransitionMoment Rank="4" Component="2" Bra="A2" Ket="v=1"/>
        <SphericalTransitionMoment Rank="4" Component="-2" Bra="B1" Ket="v=1"/>
      </TransitionMoments>
    </AsymmetricMolecule>
  </Species>
  <Parameter Name="Gaussian" Increment="0.02"/>
  <Parameter Name="Lorentzian" Value="0.5" Increment="0.02"/>
  <Parameter Name="Temperature" Value="15"/>
  <Parameter Name="Fmin" Value="60042.8692161178"/>
  <Parameter Name="Fmax" Value="60222.156992904"/>
  <Parameter Name="Tspin" Value="300"/>
  <FormSettings Name="LogWindow" ObsFileName="ND2H_b1x0.lin"/>
  <FormSettings Name="ResidualWindow" YAxis="Weighted (Obs-Calc)/Obs"/>
  <FormSettings Name="ConstantsWindow" ActiveObject="AsymmetricTop: NH3 - ND2H - B - A2"/>
  <FormSettings Name="CalWindow" ActiveObject="2+1 B-X_ND2H warm (101007_007).txt"/>
  <FormSettings Name="LevelWindow" CalcBoth="False" CalcLine="True" JoinHighest="True" TrackQuanta="False" XMax="12" ObsUpper="True">
    <Parameter Name="Ymax" Value="59400"/>
    <Parameter Name="Ymin" Value="59195"/>
    <Parameter Name="Reduction" Value="7"/>
  </FormSettings>
</Mixture>
