# Supplementary material for: Resonance enhanced multiphoton ionization spectroscopy of NHD2via the B1E′′-state
Source: Royal Society of Chemistry journal article supplement (doi:10.1039/c3cp00012e), 2013-01-01
Supplement: c3cp00012e_6.pgo [file c3cp00012e_6.pgo]

<?xml version="1.0"?>
<Mixture BasisOrder="boDiagonal" AllowComplex="True" Version="Pgopher 7.1.294 14 Dec 2012 14:26 32 bit Unicode (Delphi 23/23)">
  <Species Name="NH3" Jmax="40">
    <AsymmetricMolecule Name="ND2H" SReduction="True" C2zAxis="b" PointGroup="C2v" Representation="IIIl" eeWt="2" ooWt="2">
      <AsymmetricManifold Name="X" Initial="True">
        <AsymmetricTop Name="v=0">
          <Parameter Name="A" Value="7.44571610800829"/>
          <Parameter Name="B" Value="5.34422284499232"/>
          <Parameter Name="C" Value="3.75295877523377"/>
          <Parameter Name="DK" Value="0.00021649109331"/>
          <Parameter Name="DJK" Value="-0.00048922453879"/>
          <Parameter Name="DJ" Value="0.00033360773205"/>
          <Parameter Name="deltaK" Value="-5.270730259E-5"/>
          <Parameter Name="deltaJ" Value="0.00011290946885"/>
          <Parameter Name="HK" Value="-8.32558336073952E-8"/>
          <Parameter Name="HKJ" Value="1.92454444601138E-7"/>
          <Parameter Name="HJK" Value="-1.7011815220515E-7"/>
          <Parameter Name="HJ" Value="6.5600286048557E-8"/>
          <Parameter Name="phiK" Value="-4.38005615204636E-9"/>
          <Parameter Name="phiJK" Value="2.50100050882534E-8"/>
          <Parameter Name="phiJ" Value="-3.98168972616383E-8"/>
          <Parameter Name="LKKJ" Value="1.41721643978115E-10"/>
          <Parameter Name="LJK" Value="-1.27759418150539E-10"/>
          <Parameter Name="LJJK" Value="6.55713993979128E-11"/>
          <Parameter Name="LJ" Value="-2.02633416481745E-11"/>
          <Parameter Name="llKJ" Value="4.40553144268893E-12"/>
          <Parameter Name="llJK" Value="-1.1186874154119E-11"/>
          <Parameter Name="llJ" Value="1.46377911881959E-11"/>
        </AsymmetricTop>
        <AsymmetricTop Name="v=1" Symmetry="B1">
          <Parameter Name="Origin" Value="0.17074620102684"/>
          <Parameter Name="A" Value="7.44463850424816"/>
          <Parameter Name="B" Value="5.34386570325261"/>
          <Parameter Name="C" Value="3.753232634358"/>
          <Parameter Name="DK" Value="0.00021428221853"/>
          <Parameter Name="DJK" Value="-0.00048566602699"/>
          <Parameter Name="DJ" Value="0.00033205133866"/>
          <Parameter Name="deltaK" Value="-5.246157393E-5"/>
          <Parameter Name="deltaJ" Value="0.00011210335985"/>
          <Parameter Name="HK" Value="-7.52335604119834E-8"/>
          <Parameter Name="HKJ" Value="1.77525710136444E-7"/>
          <Parameter Name="HJK" Value="-1.60856561641721E-7"/>
          <Parameter Name="HJ" Value="6.33245416734266E-8"/>
          <Parameter Name="phiK" Value="-3.95551445126748E-9"/>
          <Parameter Name="phiJK" Value="2.39341247870885E-8"/>
          <Parameter Name="phiJ" Value="-3.82401127649449E-8"/>
          <Parameter Name="LKKJ" Value="1.29665336677683E-10"/>
          <Parameter Name="LJK" Value="-1.06206474346996E-10"/>
          <Parameter Name="LJJK" Value="5.4187470586735E-11"/>
          <Parameter Name="LJ" Value="-1.84466615234196E-11"/>
          <Parameter Name="llKJ" Value="2.85383596941588E-12"/>
          <Parameter Name="llJK" Value="-9.62525081268055E-12"/>
          <Parameter Name="llJ" Value="1.35698300322152E-11"/>
        </AsymmetricTop>
        <AsymmetricTopPerturbation bPower="1" cPower="1" Bra="v=1" Ket="v=0">
          <Parameter Name="Value" Value="0.10395943649789"/>
        </AsymmetricTopPerturbation>
        <AsymmetricTopPerturbation JPower="2" bPower="1" cPower="1" Bra="v=1" Ket="v=0">
          <Parameter Name="Value" Value="-1.839105638E-5"/>
        </AsymmetricTopPerturbation>
      </AsymmetricManifold>
      <AsymmetricManifold Name="B" Initial="True">
        <AsymmetricTop Name="A2" Symmetry="A2" Colour="Navy">
          <Parameter Name="Origin" Value="60896.063375163" Float="true" Increment="0.1" StdDev="0.0563307712681509"/>
          <Parameter Name="A" Value="7.57205237800572" Float="true" Increment="0.001" StdDev="0.0131193529524843"/>
          <Parameter Name="B" Value="4.91349774418756" Float="true" Increment="0.001" StdDev="0.00805372691665945"/>
          <Parameter Name="C" Value="3.21914998882795" Float="true" Increment="0.001" StdDev="0.00482036273648431"/>
        </AsymmetricTop>
        <AsymmetricTop Name="B1" Symmetry="B1" Colour="Maroon">
          <Parameter Name="Origin" Value="60866.7472511607" Float="true" Increment="0.1" StdDev="0.0583690740184677"/>
          <Parameter Name="A" Value="6.99909619306386" Float="true" Increment="0.001" StdDev="0.0113517895145794"/>
          <Parameter Name="B" Value="5.22637475428791" Float="true" Increment="0.001" StdDev="0.00881535325368181"/>
          <Parameter Name="C" Value="3.21914998882795" Float="true" Increment="0.001"/>
        </AsymmetricTop>
        <AsymmetricTopPerturbation cPower="1" Bra="A2" Ket="B1">
          <Parameter Name="Value" Value="-5.27293988397961" Float="true" Increment="1" StdDev="0.0206079928657832"/>
        </AsymmetricTopPerturbation>
        <AsymmetricTopPerturbation aPower="1" bPower="1" Bra="A2" Ket="B1">
          <Parameter Name="Value" Value="0.353091230952406" Float="true" StdDev="0.0211509969299626"/>
        </AsymmetricTopPerturbation>
      </AsymmetricManifold>
      <TransitionMoments Bra="B" Ket="X">
        <SphericalTransitionMoment Rank="4" Component="2" Bra="A2" Ket="v=0">
          <Parameter Name="Strength" Increment="0.2"/>
        </SphericalTransitionMoment>
        <SphericalTransitionMoment Rank="4" Component="-2" Bra="B1" Ket="v=0"/>
      </TransitionMoments>
    </AsymmetricMolecule>
  </Species>
  <Parameter Name="Gaussian" Increment="0.02"/>
  <Parameter Name="Lorentzian" Value="0.4" Increment="0.02"/>
  <Parameter Name="Temperature" Value="25"/>
  <Parameter Name="Fmin" Value="60843.5438995796"/>
  <Parameter Name="Fmax" Value="60973.6700143735"/>
  <Parameter Name="Tspin" Value="300"/>
  <FormSettings Name="LogWindow" ObsFileName="ND2H_b2x0.lin"/>
  <FormSettings Name="ConstantsWindow" ActiveObject="AsymmetricTop: NH3 - ND2H - B - B1"/>
  <FormSettings Name="LineWindow" Lines="
ND2H	B	0	1	1	X	2	1	2	60863.381	2	.00381093905666103	0	pO1,1(2)	B A2  0  0  0 - X v=0  2  1  1 : v2_059c_ND2H_656-657.4_laser_corrected.dat - Overlays
ND2H	B	1	3	2	X	1	3	2	60892.43	1	.00325262454758091	0	rQ1,0(1)	B A2  1  0  1 - X v=0  1  1  0 : v2_059c_ND2H_656-657.4_laser_corrected.dat - Overlays
ND2H	B	1	2	1	X	1	2	1	60899.524	1	.00633436230317932	0	pQ0,1(1)	B A2  1  1  0 - X v=0  1  0  1 : v2_059c_ND2H_656-657.4_laser_corrected.dat - Overlays
ND2H	B	1	0	2	X	2	0	1	60881.123	1	.00592192606582401	0	pP0,2(2)	B A2  1  1  1 - X v=0  2  0  2 : v2_059c_ND2H_656-657.4_laser_corrected.dat - Overlays
ND2H	B	2	1	2	X	1	1	1	60911.806	3	.00940724858362684	0	rR1,1(1)	B A2  2  0  2 - X v=0  1  1  1 : v2_059c_ND2H_656-657.4_laser_corrected.dat - Overlays
ND2H	B	2	1	2	X	3	1	1	60870.49	1	.00254404405903998	0	pP1,3(3)	B A2  2  0  2 - X v=0  3  1  3 : v2_059c_ND2H_656-657.4_laser_corrected.dat - Overlays
ND2H	B	2	0	2	X	0	0	1	60927.804	2	.0139113857671243	0	rS0,0(0)	B A2  2  1  1 - X v=0  0  0  0 : v2_059c_ND2H_656-657.4_laser_corrected.dat - Overlays
ND2H	B	2	0	2	X	2	0	1	60901.085	1	.00552214283416014	0	pQ0,2(2)	B A2  2  1  1 - X v=0  2  0  2 : v2_059c_ND2H_656-657.4_laser_corrected.dat - Overlays
ND2H	B	2	0	2	X	2	0	3	60888.029	1	.00170203336178921	0	rQ2,0(2)	B A2  2  1  1 - X v=0  2  2  0 : v2_059c_ND2H_656-657.4_laser_corrected.dat - Overlays
ND2H	B	2	2	3	X	3	2	1	60873.113	1	.00172126199559468	0	pP0,3(3)	B A2  2  1  2 - X v=0  3  0  3 : v2_059c_ND2H_656-657.4_laser_corrected.dat - Overlays
ND2H	B	2	1	3	X	1	1	1	60924.236	1	.0107214405502077	0	pR1,1(1)	B A2  2  2  0 - X v=0  1  1  1 : v2_059c_ND2H_656-657.4_laser_corrected.dat - Overlays
ND2H	B	2	3	2	X	1	3	2	60922.402	1	.00204114126239294	0	rR1,0(1)	B A2  2  2  1 - X v=0  1  1  0 : v2_059c_ND2H_656-657.4_laser_corrected.dat - Overlays
ND2H	B	2	3	2	X	2	3	1	60907.39	1	.00327705075288462	0	pQ1,2(2)	B A2  2  2  1 - X v=0  2  1  2 : v2_059c_ND2H_656-657.4_laser_corrected.dat - Overlays
ND2H	B	3	3	3	X	1	3	2	60935.98	1	.000782689270763884	0	tS1,0(1)	B A2  3  0  3 - X v=0  1  1  0 : v2_059c_ND2H_656-657.4_laser_corrected.dat - Overlays
ND2H	B	3	3	3	X	2	3	1	60920.973	1	.00194159407974755	0	rR1,2(2)	B A2  3  0  3 - X v=0  2  1  2 : v2_059c_ND2H_656-657.4_laser_corrected.dat - Overlays
ND2H	B	3	2	2	X	1	2	1	60946.946	1	.00571305189078413	0	rS0,1(1)	B A2  3  1  2 - X v=0  1  0  1 : v2_059c_ND2H_656-657.4_laser_corrected.dat - Overlays
ND2H	B	3	3	4	X	1	3	2	60950.988	1	.00344793233652395	0	rS1,0(1)	B A2  3  2  1 - X v=0  1  1  0 : v2_059c_ND2H_656-657.4_laser_corrected.dat - Overlays
ND2H	B	3	3	4	X	2	3	1	60935.98	1	.00134885071453942	0	pR1,2(2)	B A2  3  2  1 - X v=0  2  1  2 : v2_059c_ND2H_656-657.4_laser_corrected.dat - Overlays
ND2H	B	3	1	3	X	1	1	1	60951.472	1	.00354509114250705	0	rS1,1(1)	B A2  3  2  2 - X v=0  1  1  1 : v2_059c_ND2H_656-657.4_laser_corrected.dat - Overlays
ND2H	B	3	1	3	X	3	1	1	60910.124	1	.00228365502633525	0	pQ1,3(3)	B A2  3  2  2 - X v=0  3  1  3 : v2_059c_ND2H_656-657.4_laser_corrected.dat - Overlays
ND2H	B	3	0	4	X	2	0	1	60950.988	1	.00138886849135341	0	pR0,2(2)	B A2  3  3  1 - X v=0  2  0  2 : v2_059c_ND2H_656-657.4_laser_corrected.dat - Overlays
ND2H	B	3	0	4	X	2	0	3	60938.085	2	.00299770819641817	0	rR2,0(2)	B A2  3  3  1 - X v=0  2  2  0 : v2_059c_ND2H_656-657.4_laser_corrected.dat - Overlays
ND2H	B	4	1	3	X	2	1	2	60948.984	1	.00057058133130263	0	tS1,1(2)	B A2  4  0  4 - X v=0  2  1  1 : v2_059c_ND2H_656-657.4_laser_corrected.dat - Overlays
ND2H	B	4	1	3	X	3	1	1	60929.239	1	.000858896784734443	0	rR1,3(3)	B A2  4  0  4 - X v=0  3  1  3 : v2_059c_ND2H_656-657.4_laser_corrected.dat - Overlays
ND2H	B	4	0	2	X	2	0	1	60965.88	1	.0031121133263273	0	rS0,2(2)	B A2  4  1  3 - X v=0  2  0  2 : v2_059c_ND2H_656-657.4_laser_corrected.dat - Overlays
ND2H	B	4	0	2	X	2	0	3	60952.877	1	.00415611657019339	0	tS2,0(2)	B A2  4  1  3 - X v=0  2  2  0 : v2_059c_ND2H_656-657.4_laser_corrected.dat - Overlays
ND2H	B	4	1	4	X	2	1	2	60968.737	1	.00434676559227323	0	rS1,1(2)	B A2  4  2  2 - X v=0  2  1  1 : v2_059c_ND2H_656-657.4_laser_corrected.dat - Overlays
ND2H	B	4	1	4	X	3	1	1	60948.984	1	.000782042522138231	0	pR1,3(3)	B A2  4  2  2 - X v=0  3  1  3 : v2_059c_ND2H_656-657.4_laser_corrected.dat - Overlays
ND2H	B	4	0	4	X	3	0	2	60948.984	1	.000769058149764899	0	pR2,2(3)	B A2  4  3  1 - X v=0  3  2  2 : v2_059c_ND2H_656-657.4_laser_corrected.dat - Overlays
ND2H	B	1	1	1	X	1	1	1	60868.006	1	.00958223198776419	0	pQ1,1(1)	B B1  1  1  0 - X v=0  1  1  1 : v2_059c_ND2H_656-657.4_laser_corrected.dat - Overlays
ND2H	B	1	1	1	X	2	1	2	60846.158	1	.00190546952833052	0	pP1,1(2)	B B1  1  1  0 - X v=0  2  1  1 : v2_059c_ND2H_656-657.4_laser_corrected.dat - Overlays
ND2H	B	1	3	1	X	1	3	2	60863.376	2	.0069329362059294	0	rQ1,0(1)	B B1  1  1  1 - X v=0  1  1  0 : v2_059c_ND2H_656-657.4_laser_corrected.dat - Overlays
ND2H	B	2	2	1	X	1	2	1	60878.908	1	.00298828961482802	0	rR0,1(1)	B B1  2  0  2 - X v=0  1  0  1 : v2_059c_ND2H_656-657.4_laser_corrected.dat - Overlays
ND2H	B	2	2	1	X	2	2	2	60848.876	1	.00267977890246274	0	rQ2,1(2)	B B1  2  0  2 - X v=0  2  2  1 : v2_059c_ND2H_656-657.4_laser_corrected.dat - Overlays
ND2H	B	2	3	1	X	1	3	2	60884.336	1	.00313406269388174	0	rR1,0(1)	B B1  2  1  1 - X v=0  1  1  0 : v2_059c_ND2H_656-657.4_laser_corrected.dat - Overlays
ND2H	B	2	1	1	X	1	1	1	60877.109	1	.0107368529484268	0	rR1,1(1)	B B1  2  1  2 - X v=0  1  1  1 : v2_059c_ND2H_656-657.4_laser_corrected.dat - Overlays
ND2H	B	2	1	1	X	2	1	2	60855.738	1	.00598014320006302	0	rQ1,1(2)	B B1  2  1  2 - X v=0  2  1  1 : v2_059c_ND2H_656-657.4_laser_corrected.dat - Overlays
ND2H	B	2	2	2	X	1	2	1	60894.92	1	.0134361215799998	0	pR0,1(1)	B B1  2  2  0 - X v=0  1  0  1 : v2_059c_ND2H_656-657.4_laser_corrected.dat - Overlays
ND2H	B	2	0	1	X	0	0	1	60901.964	1	.0335322587328646	0	rS0,0(0)	B B1  2  2  1 - X v=0  0  0  0 : v2_059c_ND2H_656-657.4_laser_corrected.dat - Overlays
ND2H	B	2	0	1	X	2	0	1	60875.434	1	.00480162973579841	0	pQ0,2(2)	B B1  2  2  1 - X v=0  2  0  2 : v2_059c_ND2H_656-657.4_laser_corrected.dat - Overlays
ND2H	B	3	0	1	X	2	0	1	60879.866	1	.00814272395148758	0	rR0,2(2)	B B1  3  0  3 - X v=0  2  0  2 : v2_059c_ND2H_656-657.4_laser_corrected.dat - Overlays
ND2H	B	3	1	1	X	1	1	1	60911.806	3	.00984672551962529	0	rS1,1(1)	B B1  3  1  2 - X v=0  1  1  1 : v2_059c_ND2H_656-657.4_laser_corrected.dat - Overlays
ND2H	B	3	3	1	X	2	3	1	60878.908	1	.00483994405688745	0	rR1,2(2)	B B1  3  1  3 - X v=0  2  1  2 : v2_059c_ND2H_656-657.4_laser_corrected.dat - Overlays
ND2H	B	3	0	2	X	2	0	1	60904.941	1	.00798911788634312	0	pR0,2(2)	B B1  3  2  1 - X v=0  2  0  2 : v2_059c_ND2H_656-657.4_laser_corrected.dat - Overlays
ND2H	B	3	2	1	X	1	2	1	60915.737	1	.0121890197195654	0	rS0,1(1)	B B1  3  2  2 - X v=0  1  0  1 : v2_059c_ND2H_656-657.4_laser_corrected.dat - Overlays
ND2H	B	3	1	2	X	1	1	1	60931.044	1	.0183326771275625	0	pS1,1(1)	B B1  3  3  0 - X v=0  1  1  1 : v2_059c_ND2H_656-657.4_laser_corrected.dat - Overlays
ND2H	B	3	1	2	X	2	1	2	60909.485	1	.00618269703720372	0	pR1,1(2)	B B1  3  3  0 - X v=0  2  1  1 : v2_059c_ND2H_656-657.4_laser_corrected.dat - Overlays
ND2H	B	3	3	2	X	1	3	2	60928.469	1	.0132576753862551	0	rS1,0(1)	B B1  3  3  1 - X v=0  1  1  0 : v2_059c_ND2H_656-657.4_laser_corrected.dat - Overlays
ND2H	B	4	3	1	X	2	3	1	60926.39	1	.00416160642188176	0	rS1,2(2)	B B1  4  1  3 - X v=0  2  1  2 : v2_059c_ND2H_656-657.4_laser_corrected.dat - Overlays
ND2H	B	4	1	1	X	3	1	1	60878.908	1	.00411650182341856	0	rR1,3(3)	B B1  4  1  4 - X v=0  3  1  3 : v2_059c_ND2H_656-657.4_laser_corrected.dat - Overlays
ND2H	B	4	2	2	X	3	2	1	60916.077	1	.000760395422633986	0	pR0,3(3)	B B1  4  2  2 - X v=0  3  0  3 : v2_059c_ND2H_656-657.4_laser_corrected.dat - Overlays
ND2H	B	4	0	1	X	2	0	1	60927.804	2	.011008636014848	0	rS0,2(2)	B B1  4  2  3 - X v=0  2  0  2 : v2_059c_ND2H_656-657.4_laser_corrected.dat - Overlays
ND2H	B	4	3	2	X	3	3	2	60916.077	1	.00118702658211945	0	pR1,2(3)	B B1  4  3  1 - X v=0  3  1  2 : v2_059c_ND2H_656-657.4_laser_corrected.dat - Overlays
ND2H	B	4	1	2	X	2	1	2	60940.896	1	.00957724384034311	0	rS1,1(2)	B B1  4  3  2 - X v=0  2  1  1 : v2_059c_ND2H_656-657.4_laser_corrected.dat - Overlays
ND2H	B	4	0	3	X	2	0	3	60954.374	1	.00550014622852241	0	rS2,0(2)	B B1  4  4  1 - X v=0  2  2  0 : v2_059c_ND2H_656-657.4_laser_corrected.dat - Overlays
ND2H	B	5	1	1	X	3	1	1	60938.084	2	.00350581043457585	0	rS1,3(3)	B B1  5  1  4 - X v=0  3  1  3 : v2_059c_ND2H_656-657.4_laser_corrected.dat - Overlays
ND2H	B	5	0	4	X	3	0	2	60971.175	1	.00145500450544843	0	pS2,2(3)	B B1  5  4  1 - X v=0  3  2  2 : v2_059c_ND2H_656-657.4_laser_corrected.dat - Overlays
"/>
  <FormSettings Name="OverlayWindow" ActiveObject="ExperimentalPlot: ND2H_b2x0.ovr - V2_6_NHD2_656.109-657.607_taken_gautam_laser_corrected.dat"/>
  <FormSettings Name="CalWindow" ActiveObject="2+1 B-X_ND2H warm (101007_007).txt"/>
  <FormSettings Name="LevelWindow" CalcBoth="False" CalcLine="True" JoinHighest="True" TrackQuanta="False" XMax="12" ObsUpper="True">
    <Parameter Name="Ymax" Value="59400"/>
    <Parameter Name="Ymin" Value="59195"/>
    <Parameter Name="Reduction" Value="7"/>
  </FormSettings>
</Mixture>
