# Supplementary material for: Resonance enhanced multiphoton ionization spectroscopy of NHD2via the B1E′′-state
Source: Royal Society of Chemistry journal article supplement (doi:10.1039/c3cp00012e), 2013-01-01
Supplement: c3cp00012e_7.pgo [file c3cp00012e_7.pgo]

<?xml version="1.0"?>
<Mixture BasisOrder="boDiagonal" AllowComplex="True" PrintLevel="plDetail" Version="Pgopher 7.1.294 14 Dec 2012 14:26 32 bit Unicode (Delphi 23/23)" ShowParts="True" ShowSum="False">
  <Species Name="NH3" Jmax="40">
    <AsymmetricMolecule Name="ND2H" SReduction="True" C2zAxis="b" PointGroup="C2v" Representation="IIIl" eeWt="2" ooWt="2">
      <AsymmetricManifold Name="X" Initial="True">
        <AsymmetricTop Name="v=0">
          <Parameter Name="A" Value="7.44571610800829"/>
          <Parameter Name="B" Value="5.34422284499232"/>
          <Parameter Name="C" Value="3.75295877523377"/>
          <Parameter Name="DK" Value="0.00021649109331"/>
          <Parameter Name="DJK" Value="-0.00048922453879"/>
          <Parameter Name="DJ" Value="0.00033360773205"/>
          <Parameter Name="deltaK" Value="-5.270730259E-5"/>
          <Parameter Name="deltaJ" Value="0.00011290946885"/>
          <Parameter Name="HK" Value="-8.32558336073952E-8"/>
          <Parameter Name="HKJ" Value="1.92454444601138E-7"/>
          <Parameter Name="HJK" Value="-1.7011815220515E-7"/>
          <Parameter Name="HJ" Value="6.5600286048557E-8"/>
          <Parameter Name="phiK" Value="-4.38005615204636E-9"/>
          <Parameter Name="phiJK" Value="2.50100050882534E-8"/>
          <Parameter Name="phiJ" Value="-3.98168972616383E-8"/>
          <Parameter Name="LKKJ" Value="1.41721643978115E-10"/>
          <Parameter Name="LJK" Value="-1.27759418150539E-10"/>
          <Parameter Name="LJJK" Value="6.55713993979128E-11"/>
          <Parameter Name="LJ" Value="-2.02633416481745E-11"/>
          <Parameter Name="llKJ" Value="4.40553144268893E-12"/>
          <Parameter Name="llJK" Value="-1.1186874154119E-11"/>
          <Parameter Name="llJ" Value="1.46377911881959E-11"/>
        </AsymmetricTop>
        <AsymmetricTop Name="v=1" Symmetry="B1">
          <Parameter Name="Origin" Value="0.17074620102684"/>
          <Parameter Name="A" Value="7.44463850424816"/>
          <Parameter Name="B" Value="5.34386570325261"/>
          <Parameter Name="C" Value="3.753232634358"/>
          <Parameter Name="DK" Value="0.00021428221853"/>
          <Parameter Name="DJK" Value="-0.00048566602699"/>
          <Parameter Name="DJ" Value="0.00033205133866"/>
          <Parameter Name="deltaK" Value="-5.246157393E-5"/>
          <Parameter Name="deltaJ" Value="0.00011210335985"/>
          <Parameter Name="HK" Value="-7.52335604119834E-8"/>
          <Parameter Name="HKJ" Value="1.77525710136444E-7"/>
          <Parameter Name="HJK" Value="-1.60856561641721E-7"/>
          <Parameter Name="HJ" Value="6.33245416734266E-8"/>
          <Parameter Name="phiK" Value="-3.95551445126748E-9"/>
          <Parameter Name="phiJK" Value="2.39341247870885E-8"/>
          <Parameter Name="phiJ" Value="-3.82401127649449E-8"/>
          <Parameter Name="LKKJ" Value="1.29665336677683E-10"/>
          <Parameter Name="LJK" Value="-1.06206474346996E-10"/>
          <Parameter Name="LJJK" Value="5.4187470586735E-11"/>
          <Parameter Name="LJ" Value="-1.84466615234196E-11"/>
          <Parameter Name="llKJ" Value="2.85383596941588E-12"/>
          <Parameter Name="llJK" Value="-9.62525081268055E-12"/>
          <Parameter Name="llJ" Value="1.35698300322152E-11"/>
        </AsymmetricTop>
        <AsymmetricTopPerturbation bPower="1" cPower="1" Bra="v=1" Ket="v=0">
          <Parameter Name="Value" Value="0.10395943649789"/>
        </AsymmetricTopPerturbation>
        <AsymmetricTopPerturbation JPower="2" bPower="1" cPower="1" Bra="v=1" Ket="v=0">
          <Parameter Name="Value" Value="-1.839105638E-5"/>
        </AsymmetricTopPerturbation>
      </AsymmetricManifold>
      <AsymmetricManifold Name="B" Initial="True">
        <AsymmetricTop Name="A2" Symmetry="B2" Colour="Navy">
          <Parameter Name="Origin" Value="61704.570435761" Float="true" Increment="0.1" StdDev="0.0368322330440511"/>
          <Parameter Name="A" Value="7.09530074970196" Float="true" Increment="0.001" StdDev="0.0085033634114756"/>
          <Parameter Name="B" Value="4.74965576336229" Float="true" Increment="0.001" StdDev="0.00636180558457633"/>
          <Parameter Name="C" Value="3.23495221758362" Float="true" Increment="0.001" StdDev="0.00474398663765407"/>
        </AsymmetricTop>
        <AsymmetricTop Name="B1" Colour="Maroon">
          <Parameter Name="Origin" Value="61678.2527068497" Float="true" Increment="0.1" StdDev="0.0380741478966245"/>
          <Parameter Name="A" Value="6.66203075956142" Float="true" Increment="0.001" StdDev="0.00547113700359899"/>
          <Parameter Name="B" Value="5.04869970101347" Float="true" Increment="0.001" StdDev="0.00632487177382579"/>
          <Parameter Name="C" Value="3.23495221758362" Increment="0.001"/>
        </AsymmetricTop>
        <AsymmetricTopPerturbation cPower="1" Bra="A2" Ket="B1">
          <Parameter Name="Value" Value="-5.33202048725053" Float="true" StdDev="0.0179743395101342"/>
        </AsymmetricTopPerturbation>
        <AsymmetricTopPerturbation aPower="1" bPower="1" Bra="A2" Ket="B1">
          <Parameter Name="Value" Value="0.309715059552315" Float="true" StdDev="0.00974587777765664"/>
        </AsymmetricTopPerturbation>
      </AsymmetricManifold>
      <TransitionMoments Bra="B" Ket="X">
        <SphericalTransitionMoment Rank="4" Component="2" Bra="A2" Ket="v=1"/>
        <SphericalTransitionMoment Rank="4" Component="-2" Bra="B1" Ket="v=1"/>
      </TransitionMoments>
    </AsymmetricMolecule>
  </Species>
  <Parameter Name="Gaussian" Increment="0.02"/>
  <Parameter Name="Lorentzian" Value="0.5" Increment="0.02"/>
  <Parameter Name="Temperature" Value="30"/>
  <Parameter Name="Fmin" Value="61613.1429410144"/>
  <Parameter Name="Fmax" Value="61809.4224962833"/>
  <Parameter Name="Tspin" Value="300"/>
  <FormSettings Name="LogWindow" ObsFileName="ND2H_b3x0.lin"/>
  <FormSettings Name="ConstantsWindow" ActiveObject="AsymmetricMolecule: NH3 - ND2H"/>
  <FormSettings Name="LineWindow" Lines="
ND2H	B	0	3	1	X	2	3	2	61672.013	1	.00189138880831982	0	pO1,1(2)	B A2  0  0  0 - X v=1  2  1  1 : v3_061c_ND2H_647.1-649.2_laser_corrected.dat - Overlays
ND2H	B	1	1	2	X	1	1	2	61700.946	1	.00521975385786578	0	rQ1,0(1)	B A2  1  0  1 - X v=1  1  1  0 : v3_061c_ND2H_647.1-649.2_laser_corrected.dat - Overlays
ND2H	B	1	1	2	X	2	1	1	61685.942	1	.00334946726991856	0	pP1,2(2)	B A2  1  0  1 - X v=1  2  1  2 : v3_061c_ND2H_647.1-649.2_laser_corrected.dat - Overlays
ND2H	B	1	1	2	X	3	1	2	61651.856	1	.001642359910614	0	pO1,2(3)	B A2  1  0  1 - X v=1  3  1  2 : v3_061c_ND2H_647.1-649.2_laser_corrected.dat - Overlays
ND2H	B	1	0	1	X	1	0	1	61707.45	1	.0105447757773548	0	pQ0,1(1)	B A2  1  1  0 - X v=1  1  0  1 : v3_061c_ND2H_647.1-649.2_laser_corrected.dat - Overlays
ND2H	B	1	0	1	X	2	0	2	61677.589	1	.00136383607619172	0	pP2,1(2)	B A2  1  1  0 - X v=1  2  2  1 : v3_061c_ND2H_647.1-649.2_laser_corrected.dat - Overlays
ND2H	B	1	0	1	X	3	0	3	61647.496	1	.000992106369887796	0	pO2,1(3)	B A2  1  1  0 - X v=1  3  2  1 : v3_061c_ND2H_647.1-649.2_laser_corrected.dat - Overlays
ND2H	B	1	2	2	X	2	2	3	61676.217	1	.000653285435010734	0	rP2,0(2)	B A2  1  1  1 - X v=1  2  2  0 : v3_061c_ND2H_647.1-649.2_laser_corrected.dat - Overlays
ND2H	B	1	2	2	X	3	2	2	61649.717	1	.000506136120339404	0	pO2,2(3)	B A2  1  1  1 - X v=1  3  2  2 : v3_061c_ND2H_647.1-649.2_laser_corrected.dat - Overlays
ND2H	B	2	3	2	X	1	3	1	61720.366	1	.00378851891991101	0	rR1,1(1)	B A2  2  0  2 - X v=1  1  1  1 : v3_061c_ND2H_647.1-649.2_laser_corrected.dat - Overlays
ND2H	B	2	3	2	X	4	3	2	61631.644	1	.000182295790278211	0	pO1,3(4)	B A2  2  0  2 - X v=1  4  1  3 : v3_061c_ND2H_647.1-649.2_laser_corrected.dat - Overlays
ND2H	B	2	2	2	X	0	2	1	61735.382	1	.00485703729334218	0	rS0,0(0)	B A2  2  1  1 - X v=1  0  0  0 : v3_061c_ND2H_647.1-649.2_laser_corrected.dat - Overlays
ND2H	B	2	2	2	X	2	2	1	61708.603	1	.00287876007998679	0	pQ0,2(2)	B A2  2  1  1 - X v=1  2  0  2 : v3_061c_ND2H_647.1-649.2_laser_corrected.dat - Overlays
ND2H	B	2	0	3	X	3	0	1	61681.369	1	.00349546536285515	0	pP0,3(3)	B A2  2  1  2 - X v=1  3  0  3 : v3_061c_ND2H_647.1-649.2_laser_corrected.dat - Overlays
ND2H	B	2	0	3	X	4	0	2	61631.108	1	.000274062250729133	0	pO2,3(4)	B A2  2  1  2 - X v=1  4  2  3 : v3_061c_ND2H_647.1-649.2_laser_corrected.dat - Overlays
ND2H	B	2	3	3	X	3	3	3	61660.625	1	.000102443999412605	0	qP3,0(3)	B A2  2  2  0 - X v=0  3  3  0 : v3_061c_ND2H_647.1-649.2_laser_corrected.dat - Overlays
ND2H	B	2	3	3	X	1	3	1	61730.846	1	.00433759911766705	0	pR1,1(1)	B A2  2  2  0 - X v=1  1  1  1 : v3_061c_ND2H_647.1-649.2_laser_corrected.dat - Overlays
ND2H	B	2	3	3	X	2	3	2	61709.373	1	.00131378842473782	0	pQ1,1(2)	B A2  2  2  0 - X v=1  2  1  1 : v3_061c_ND2H_647.1-649.2_laser_corrected.dat - Overlays
ND2H	B	2	3	3	X	3	3	4	61660.625	1	.000109376726231475	0	pP3,1(3)	B A2  2  2  0 - X v=1  3  3  1 : v3_061c_ND2H_647.1-649.2_laser_corrected.dat - Overlays
ND2H	B	2	3	3	X	4	3	4	61622.445	1	5.19161782285761e-5	0	pO3,1(4)	B A2  2  2  0 - X v=1  4  3  1 : v3_061c_ND2H_647.1-649.2_laser_corrected.dat - Overlays
ND2H	B	2	1	2	X	1	1	2	61729.264	1	.0033504412240187	0	rR1,0(1)	B A2  2  2  1 - X v=1  1  1  0 : v3_061c_ND2H_647.1-649.2_laser_corrected.dat - Overlays
ND2H	B	2	1	2	X	2	1	1	61714.069	1	.00668750638363466	0	pQ1,2(2)	B A2  2  2  1 - X v=1  2  1  2 : v3_061c_ND2H_647.1-649.2_laser_corrected.dat - Overlays
ND2H	B	2	1	2	X	3	1	4	61660.625	1	.000388805238544284	0	rP3,0(3)	B A2  2  2  1 - X v=1  3  3  0 : v3_061c_ND2H_647.1-649.2_laser_corrected.dat - Overlays
ND2H	B	2	1	2	X	4	1	3	61623.49	1	.000109159027973629	0	pO3,2(4)	B A2  2  2  1 - X v=1  4  3  2 : v3_061c_ND2H_647.1-649.2_laser_corrected.dat - Overlays
ND2H	B	3	1	3	X	1	1	2	61744.467	1	.00137404989855329	0	tS1,0(1)	B A2  3  0  3 - X v=1  1  1  0 : v3_061c_ND2H_647.1-649.2_laser_corrected.dat - Overlays
ND2H	B	3	1	3	X	2	1	1	61729.264	1	.00325114833818775	0	rR1,2(2)	B A2  3  0  3 - X v=1  2  1  2 : v3_061c_ND2H_647.1-649.2_laser_corrected.dat - Overlays
ND2H	B	3	1	3	X	4	1	1	61672.013	1	.00103099893170456	0	pP1,4(4)	B A2  3  0  3 - X v=1  4  1  4 : v3_061c_ND2H_647.1-649.2_laser_corrected.dat - Overlays
ND2H	B	3	0	2	X	1	0	1	61753.847	1	.00880011270875473	0	rS0,1(1)	B A2  3  1  2 - X v=1  1  0  1 : v3_061c_ND2H_647.1-649.2_laser_corrected.dat - Overlays
ND2H	B	3	1	4	X	1	1	2	61756.945	1	.00575895778873189	0	rS1,0(1)	B A2  3  2  1 - X v=1  1  1  0 : v3_061c_ND2H_647.1-649.2_laser_corrected.dat - Overlays
ND2H	B	3	1	4	X	2	1	1	61742.053	1	.00268296043400978	0	pR1,2(2)	B A2  3  2  1 - X v=1  2  1  2 : v3_061c_ND2H_647.1-649.2_laser_corrected.dat - Overlays
ND2H	B	3	3	3	X	3	3	1	61716.841	1	.00149479105350005	0	pQ1,3(3)	B A2  3  2  2 - X v=1  3  1  3 : v3_061c_ND2H_647.1-649.2_laser_corrected.dat - Overlays
ND2H	B	3	0	3	X	1	0	1	61772.6	1	.000729756514773165	0	pS0,1(1)	B A2  3  3  0 - X v=1  1  0  1 : v3_061c_ND2H_647.1-649.2_laser_corrected.dat - Overlays
ND2H	B	3	0	3	X	2	0	2	61742.831	1	.00372508386293123	0	pR2,1(2)	B A2  3  3  0 - X v=1  2  2  1 : v3_061c_ND2H_647.1-649.2_laser_corrected.dat - Overlays
ND2H	B	3	2	4	X	2	2	3	61742.053	1	.00146397446957459	0	rR2,0(2)	B A2  3  3  1 - X v=1  2  2  0 : v3_061c_ND2H_647.1-649.2_laser_corrected.dat - Overlays
ND2H	B	4	2	2	X	2	2	3	61758.883	1	.00338999319660519	0	tS2,0(2)	B A2  4  1  3 - X v=1  2  2  0 : v3_061c_ND2H_647.1-649.2_laser_corrected.dat - Overlays
ND2H	B	4	3	4	X	2	3	2	61773.859	1	.00183047003122617	0	rS1,1(2)	B A2  4  2  2 - X v=1  2  1  1 : v3_061c_ND2H_647.1-649.2_laser_corrected.dat - Overlays
ND2H	B	4	1	3	X	2	1	1	61776.336	1	.00146201674741995	0	rS1,2(2)	B A2  4  2  3 - X v=1  2  1  2 : v3_061c_ND2H_647.1-649.2_laser_corrected.dat - Overlays
ND2H	B	4	0	5	X	3	0	1	61767.132	1	.000769888992314812	0	pR0,3(3)	B A2  4  3  2 - X v=1  3  0  3 : v3_061c_ND2H_647.1-649.2_laser_corrected.dat - Overlays
ND2H	B	5	0	3	X	3	0	1	61791.863	1	.000663047501670666	0	rS0,3(3)	B A2  5  1  4 - X v=1  3  0  3 : v3_061c_ND2H_647.1-649.2_laser_corrected.dat - Overlays
ND2H	B	5	1	4	X	3	1	2	61790.048	1	.00111453939818107	0	rS1,2(3)	B A2  5  2  3 - X v=1  3  1  2 : v3_061c_ND2H_647.1-649.2_laser_corrected.dat - Overlays
ND2H	B	5	1	6	X	3	1	4	61801.519	1	.000147801466440791	0	rS3,0(3)	B A2  5  4  1 - X v=1  3  3  0 : v3_061c_ND2H_647.1-649.2_laser_corrected.dat - Overlays
ND2H	B	5	3	5	X	3	3	4	61801.519	1	3.7702281600852e-5	0	rS3,1(3)	B A2  5  4  2 - X v=1  3  3  1 : v3_061c_ND2H_647.1-649.2_laser_corrected.dat - Overlays
ND2H	B	0	0	1	X	2	0	2	61639.35	1	.00272767215238344	0	pO2,1(2)	B B1  0  0  0 - X v=1  2  2  1 : v3_061c_ND2H_647.1-649.2_laser_corrected.dat - Overlays
ND2H	B	1	2	1	X	2	2	3	61646.023	1	.00316260682655665	0	rP2,0(2)	B B1  1  0  1 - X v=1  2  2  0 : v3_061c_ND2H_647.1-649.2_laser_corrected.dat - Overlays
ND2H	B	1	3	1	X	1	3	1	61678.806	1	.00474390746837482	0	pQ1,1(1)	B B1  1  1  0 - X v=1  1  1  1 : v3_061c_ND2H_647.1-649.2_laser_corrected.dat - Overlays
ND2H	B	1	3	1	X	2	3	2	61657.491	1	.000945694404159912	0	pP1,1(2)	B B1  1  1  0 - X v=1  2  1  1 : v3_061c_ND2H_647.1-649.2_laser_corrected.dat - Overlays
ND2H	B	1	1	1	X	1	1	2	61674.225	1	.0123829075963526	0	rQ1,0(1)	B B1  1  1  1 - X v=1  1  1  0 : v3_061c_ND2H_647.1-649.2_laser_corrected.dat - Overlays
ND2H	B	2	0	1	X	1	0	1	61689.304	1	.00539845212118098	0	rR0,1(1)	B B1  2  0  2 - X v=1  1  0  1 : v3_061c_ND2H_647.1-649.2_laser_corrected.dat - Overlays
ND2H	B	2	0	1	X	2	0	2	61659.83	1	.0054056156263678	0	rQ2,1(2)	B B1  2  0  2 - X v=1  2  2  1 : v3_061c_ND2H_647.1-649.2_laser_corrected.dat - Overlays
ND2H	B	2	0	1	X	3	0	3	61629.725	1	.00127421467445794	0	rP2,1(3)	B B1  2  0  2 - X v=1  3  2  1 : v3_061c_ND2H_647.1-649.2_laser_corrected.dat - Overlays
ND2H	B	2	1	1	X	1	1	2	61694.739	1	.00644162119061502	0	rR1,0(1)	B B1  2  1  1 - X v=1  1  1  0 : v3_061c_ND2H_647.1-649.2_laser_corrected.dat - Overlays
ND2H	B	2	1	1	X	2	1	1	61679.794	1	.00348843070704578	0	pQ1,2(2)	B B1  2  1  1 - X v=1  2  1  2 : v3_061c_ND2H_647.1-649.2_laser_corrected.dat - Overlays
ND2H	B	2	1	1	X	3	1	4	61626.283	1	.000749424706192242	0	rP3,0(3)	B B1  2  1  1 - X v=1  3  3  0 : v3_061c_ND2H_647.1-649.2_laser_corrected.dat - Overlays
ND2H	B	2	3	1	X	1	3	1	61687.949	1	.00474480236696139	0	rR1,1(1)	B B1  2  1  2 - X v=1  1  1  1 : v3_061c_ND2H_647.1-649.2_laser_corrected.dat - Overlays
ND2H	B	2	3	1	X	2	3	2	61666.504	1	.00323795857395833	0	rQ1,1(2)	B B1  2  1  2 - X v=1  2  1  1 : v3_061c_ND2H_647.1-649.2_laser_corrected.dat - Overlays
ND2H	B	2	0	2	X	1	0	1	61704.721	1	.0222695202897193	0	pR0,1(1)	B B1  2  2  0 - X v=1  1  0  1 : v3_061c_ND2H_647.1-649.2_laser_corrected.dat - Overlays
ND2H	B	2	2	1	X	0	2	1	61711.881	1	.0132039032759166	0	rS0,0(0)	B B1  2  2  1 - X v=1  0  0  0 : v3_061c_ND2H_647.1-649.2_laser_corrected.dat - Overlays
ND2H	B	3	2	1	X	3	2	2	61650.77	1	.00104698633358379	0	rQ2,2(3)	B B1  3  0  3 - X v=1  3  2  2 : v3_061c_ND2H_647.1-649.2_laser_corrected.dat - Overlays
ND2H	B	3	3	1	X	1	3	1	61720.754	1	.00451668741951532	0	rS1,1(1)	B B1  3  1  2 - X v=1  1  1  1 : v3_061c_ND2H_647.1-649.2_laser_corrected.dat - Overlays
ND2H	B	3	1	1	X	2	1	1	61689.304	1	.0100780943159565	0	rR1,2(2)	B B1  3  1  3 - X v=1  2  1  2 : v3_061c_ND2H_647.1-649.2_laser_corrected.dat - Overlays
ND2H	B	3	1	1	X	3	1	2	61655.239	1	.00203862047065682	0	rQ1,2(3)	B B1  3  1  3 - X v=1  3  1  2 : v3_061c_ND2H_647.1-649.2_laser_corrected.dat - Overlays
ND2H	B	3	0	1	X	1	0	1	61724.895	1	.0210107548567127	0	rS0,1(1)	B B1  3  2  2 - X v=1  1  0  1 : v3_061c_ND2H_647.1-649.2_laser_corrected.dat - Overlays
ND2H	B	3	3	2	X	1	3	1	61739.075	1	.00770200324850054	0	pS1,1(1)	B B1  3  3  0 - X v=1  1  1  1 : v3_061c_ND2H_647.1-649.2_laser_corrected.dat - Overlays
ND2H	B	3	3	2	X	2	3	2	61717.66	1	.00319484605412378	0	pR1,1(2)	B B1  3  3  0 - X v=1  2  1  1 : v3_061c_ND2H_647.1-649.2_laser_corrected.dat - Overlays
ND2H	B	3	1	2	X	1	1	2	61736.446	1	.0236649950942922	0	rS1,0(1)	B B1  3  3  1 - X v=1  1  1  0 : v3_061c_ND2H_647.1-649.2_laser_corrected.dat - Overlays
ND2H	B	3	1	2	X	2	1	1	61721.184	1	.00270477636305191	0	pR1,2(2)	B B1  3  3  1 - X v=1  2  1  2 : v3_061c_ND2H_647.1-649.2_laser_corrected.dat - Overlays
ND2H	B	4	1	1	X	2	1	1	61734.885	1	.0087136076358595	0	rS1,2(2)	B B1  4  1  3 - X v=1  2  1  2 : v3_061c_ND2H_647.1-649.2_laser_corrected.dat - Overlays
ND2H	B	4	3	2	X	2	3	2	61747.948	1	.00521593713821208	0	rS1,1(2)	B B1  4  3  2 - X v=1  2  1  1 : v3_061c_ND2H_647.1-649.2_laser_corrected.dat - Overlays
ND2H	B	4	0	4	X	2	0	2	61760.83	1	.00780801041793464	0	pS2,1(2)	B B1  4  4  0 - X v=1  2  2  1 : v3_061c_ND2H_647.1-649.2_laser_corrected.dat - Overlays
ND2H	B	4	2	3	X	2	2	1	61773.588	1	.000688177231275558	0	pS0,2(2)	B B1  4  4  1 - X v=1  2  0  2 : v3_061c_ND2H_647.1-649.2_laser_corrected.dat - Overlays
ND2H	B	5	0	1	X	3	0	1	61746.128	1	.00391117648249697	0	rS0,3(3)	B B1  5  2  4 - X v=1  3  0  3 : v3_061c_ND2H_647.1-649.2_laser_corrected.dat - Overlays
ND2H	B	5	1	2	X	3	1	2	61757.939	1	.00303397533639348	0	rS1,2(3)	B B1  5  3  3 - X v=1  3  1  2 : v3_061c_ND2H_647.1-649.2_laser_corrected.dat - Overlays
ND2H	B	5	0	2	X	3	0	3	61769.985	1	.00265774287088378	0	rS2,1(3)	B B1  5  4  2 - X v=1  3  2  1 : v3_061c_ND2H_647.1-649.2_laser_corrected.dat - Overlays
ND2H	B	5	3	4	X	3	3	4	61781.399	1	.000401468009229603	0	pS3,1(3)	B B1  5  5  0 - X v=1  3  3  1 : v3_061c_ND2H_647.1-649.2_laser_corrected.dat - Overlays
ND2H	B	5	1	5	X	3	1	4	61781.399	1	.00152416534854876	0	rS3,0(3)	B B1  5  5  1 - X v=1  3  3  0 : v3_061c_ND2H_647.1-649.2_laser_corrected.dat - Overlays
ND2H	B	6	1	1	X	4	1	1	61754.918	1	.000890685870031817	0	rS1,4(4)	B B1  6  1  5 - X v=1  4  1  4 : v3_061c_ND2H_647.1-649.2_laser_corrected.dat - Overlays
ND2H	B	6	2	1	X	4	2	1	61754.918	1	.000454436982938006	0	rS0,4(4)	B B1  6  2  5 - X v=1  4  0  4 : v3_061c_ND2H_647.1-649.2_laser_corrected.dat - Overlays
ND2H	B	6	0	4	X	4	0	2	61793.455	1	.000111315227798641	0	pS2,3(4)	B B1  6  4  2 - X v=1  4  2  3 : v3_061c_ND2H_647.1-649.2_laser_corrected.dat - Overlays
ND2H	B	6	1	4	X	4	1	3	61793.455	1	.000190749423617374	0	pS3,2(4)	B B1  6  5  1 - X v=1  4  3  2 : v3_061c_ND2H_647.1-649.2_laser_corrected.dat - Overlays
"/>
  <FormSettings Name="OverlayWindow" ActiveObject="ExperimentalPlot: excimer.ovr - 2+1 B-X_ND2H warm (101007_007).txt"/>
  <FormSettings Name="CalWindow" ActiveObject="2+1 B-X_ND2H warm (101007_007).txt"/>
  <FormSettings Name="LevelWindow" CalcBoth="False" CalcLine="True" JoinHighest="True" TrackQuanta="False" XMax="12" ObsUpper="True">
    <Parameter Name="Ymax" Value="59400"/>
    <Parameter Name="Ymin" Value="59195"/>
    <Parameter Name="Reduction" Value="7"/>
  </FormSettings>
</Mixture>
