# Supplementary material for: Resonance enhanced multiphoton ionization spectroscopy of NHD2via the B1E′′-state
Source: Royal Society of Chemistry journal article supplement (doi:10.1039/c3cp00012e), 2013-01-01
Supplement: c3cp00012e_8.pgo [file c3cp00012e_8.pgo]

<?xml version="1.0"?>
<Mixture BasisOrder="boDiagonal" AllowComplex="True" PrintLevel="plDetail" Version="Pgopher 7.1.294 14 Dec 2012 9:42 64 bit Unicode (Delphi 23/23)" ShowParts="True" ShowSum="False">
  <Species Name="NH3" Jmax="40">
    <AsymmetricMolecule Name="ND2H" SReduction="True" C2zAxis="b" PointGroup="C2v" Representation="IIIl" eeWt="2" ooWt="2">
      <AsymmetricManifold Name="X" Initial="True">
        <AsymmetricTop Name="v=0">
          <Parameter Name="A" Value="7.44571610800829"/>
          <Parameter Name="B" Value="5.34422284499232"/>
          <Parameter Name="C" Value="3.75295877523377"/>
          <Parameter Name="DK" Value="0.00021649109331"/>
          <Parameter Name="DJK" Value="-0.00048922453879"/>
          <Parameter Name="DJ" Value="0.00033360773205"/>
          <Parameter Name="deltaK" Value="-5.270730259E-5"/>
          <Parameter Name="deltaJ" Value="0.00011290946885"/>
          <Parameter Name="HK" Value="-8.32558336073952E-8"/>
          <Parameter Name="HKJ" Value="1.92454444601138E-7"/>
          <Parameter Name="HJK" Value="-1.7011815220515E-7"/>
          <Parameter Name="HJ" Value="6.5600286048557E-8"/>
          <Parameter Name="phiK" Value="-4.38005615204636E-9"/>
          <Parameter Name="phiJK" Value="2.50100050882534E-8"/>
          <Parameter Name="phiJ" Value="-3.98168972616383E-8"/>
          <Parameter Name="LKKJ" Value="1.41721643978115E-10"/>
          <Parameter Name="LJK" Value="-1.27759418150539E-10"/>
          <Parameter Name="LJJK" Value="6.55713993979128E-11"/>
          <Parameter Name="LJ" Value="-2.02633416481745E-11"/>
          <Parameter Name="llKJ" Value="4.40553144268893E-12"/>
          <Parameter Name="llJK" Value="-1.1186874154119E-11"/>
          <Parameter Name="llJ" Value="1.46377911881959E-11"/>
        </AsymmetricTop>
        <AsymmetricTop Name="v=1" Symmetry="B1">
          <Parameter Name="Origin" Value="0.17074620102684"/>
          <Parameter Name="A" Value="7.44463850424816"/>
          <Parameter Name="B" Value="5.34386570325261"/>
          <Parameter Name="C" Value="3.753232634358"/>
          <Parameter Name="DK" Value="0.00021428221853"/>
          <Parameter Name="DJK" Value="-0.00048566602699"/>
          <Parameter Name="DJ" Value="0.00033205133866"/>
          <Parameter Name="deltaK" Value="-5.246157393E-5"/>
          <Parameter Name="deltaJ" Value="0.00011210335985"/>
          <Parameter Name="HK" Value="-7.52335604119834E-8"/>
          <Parameter Name="HKJ" Value="1.77525710136444E-7"/>
          <Parameter Name="HJK" Value="-1.60856561641721E-7"/>
          <Parameter Name="HJ" Value="6.33245416734266E-8"/>
          <Parameter Name="phiK" Value="-3.95551445126748E-9"/>
          <Parameter Name="phiJK" Value="2.39341247870885E-8"/>
          <Parameter Name="phiJ" Value="-3.82401127649449E-8"/>
          <Parameter Name="LKKJ" Value="1.29665336677683E-10"/>
          <Parameter Name="LJK" Value="-1.06206474346996E-10"/>
          <Parameter Name="LJJK" Value="5.4187470586735E-11"/>
          <Parameter Name="LJ" Value="-1.84466615234196E-11"/>
          <Parameter Name="llKJ" Value="2.85383596941588E-12"/>
          <Parameter Name="llJK" Value="-9.62525081268055E-12"/>
          <Parameter Name="llJ" Value="1.35698300322152E-11"/>
        </AsymmetricTop>
        <AsymmetricTopPerturbation bPower="1" cPower="1" Bra="v=1" Ket="v=0">
          <Parameter Name="Value" Value="0.10395943649789"/>
        </AsymmetricTopPerturbation>
        <AsymmetricTopPerturbation JPower="2" bPower="1" cPower="1" Bra="v=1" Ket="v=0">
          <Parameter Name="Value" Value="-1.839105638E-5"/>
        </AsymmetricTopPerturbation>
      </AsymmetricManifold>
      <AsymmetricManifold Name="B" Initial="True">
        <AsymmetricTop Name="A2" Symmetry="A2" Colour="Navy">
          <Parameter Name="Origin" Value="62531.0398002628" Float="true" Increment="1" StdDev="0.054076503516657"/>
          <Parameter Name="A" Value="6.70140803901443" Float="true" Increment="0.001" StdDev="0.0155169035625335"/>
          <Parameter Name="B" Value="4.58428903056715" Float="true" Increment="0.001" StdDev="0.00987309038843582"/>
          <Parameter Name="C" Value="3.22231510651722" Float="true" Increment="0.001" StdDev="0.0145563986265094"/>
        </AsymmetricTop>
        <AsymmetricTop Name="B1" Symmetry="B1" Colour="Maroon">
          <Parameter Name="Origin" Value="62507.7898289392" Float="true" Increment="0.1" StdDev="0.0577801926131289"/>
          <Parameter Name="A" Value="6.33462731276" Float="true" Increment="0.001" StdDev="0.0129928774107358"/>
          <Parameter Name="B" Value="4.90988581383777" Float="true" Increment="0.001" StdDev="0.0149156042507577"/>
          <Parameter Name="C" Value="3.27742031153567" Increment="0.001"/>
        </AsymmetricTop>
        <AsymmetricTopPerturbation cPower="1" Bra="A2" Ket="B1">
          <Parameter Name="Value" Value="-5.45130595171138" Float="true" StdDev="0.0216271521493299"/>
        </AsymmetricTopPerturbation>
        <AsymmetricTopPerturbation aPower="1" bPower="1" Bra="A2" Ket="B1">
          <Parameter Name="Value" Value="0.323292957284207" Float="true" StdDev="0.0317208691201339"/>
        </AsymmetricTopPerturbation>
      </AsymmetricManifold>
      <TransitionMoments Bra="B" Ket="X">
        <SphericalTransitionMoment Rank="4" Component="2" Bra="A2" Ket="v=0"/>
        <SphericalTransitionMoment Rank="4" Component="-2" Bra="B1" Ket="v=0"/>
      </TransitionMoments>
    </AsymmetricMolecule>
  </Species>
  <Parameter Name="Gaussian" Increment="0.02"/>
  <Parameter Name="Lorentzian" Value="0.550901937561769" Increment="0.02"/>
  <Parameter Name="Temperature" Value="30"/>
  <Parameter Name="Fmin" Value="62436.5455133829"/>
  <Parameter Name="Fmax" Value="62466.5627685859"/>
  <Parameter Name="Tspin" Value="300"/>
  <FormSettings Name="LineWindow" Lines="
ND2H	B	0	1	1	X	2	1	2	62498.39	1	.00311788335457635	0	pO1,1(2)	B A2  0  0  0 - X v=0  2  1  1 : v4_081c_ND2H_638.5-640.5_laser_corrected.dat - Overlays
ND2H	B	1	3	2	X	1	3	2	62527.275	1	.0032016277940442	0	rQ1,0(1)	B A2  1  0  1 - X v=0  1  1  0 : v4_081c_ND2H_638.5-640.5_laser_corrected.dat - Overlays
ND2H	B	1	3	2	X	2	3	1	62512.425	1	.00159904796925958	0	pP1,2(2)	B A2  1  0  1 - X v=0  2  1  2 : v4_081c_ND2H_638.5-640.5_laser_corrected.dat - Overlays
ND2H	B	1	3	2	X	3	3	2	62478.453	1	.000834858031386769	0	pO1,2(3)	B A2  1  0  1 - X v=0  3  1  2 : v4_081c_ND2H_638.5-640.5_laser_corrected.dat - Overlays
ND2H	B	1	2	1	X	1	2	1	62533.166	1	.00531572671304758	0	pQ0,1(1)	B A2  1  1  0 - X v=0  1  0  1 : v4_081c_ND2H_638.5-640.5_laser_corrected.dat - Overlays
ND2H	B	1	2	1	X	3	2	3	62473.341	1	.000334755036187632	0	pO2,1(3)	B A2  1  1  0 - X v=0  3  2  1 : v4_081c_ND2H_638.5-640.5_laser_corrected.dat - Overlays
ND2H	B	1	0	2	X	2	0	1	62515.362	1	.00560024015987249	0	pP0,2(2)	B A2  1  1  1 - X v=0  2  0  2 : v4_081c_ND2H_638.5-640.5_laser_corrected.dat - Overlays
ND2H	B	2	1	2	X	1	1	1	62546.745	1	.0105064979118494	0	rR1,1(1)	B A2  2  0  2 - X v=0  1  1  1 : v4_081c_ND2H_638.5-640.5_laser_corrected.dat - Overlays
ND2H	B	2	1	2	X	3	1	1	62505.767	1	.0025029135939766	0	pP1,3(3)	B A2  2  0  2 - X v=0  3  1  3 : v4_081c_ND2H_638.5-640.5_laser_corrected.dat - Overlays
ND2H	B	2	0	2	X	0	0	1	62560.932	1	.0160768048773676	0	rS0,0(0)	B A2  2  1  1 - X v=0  0  0  0 : v4_081c_ND2H_638.5-640.5_laser_corrected.dat - Overlays
ND2H	B	2	0	2	X	2	0	1	62534.068	1	.0056947044620968	0	pQ0,2(2)	B A2  2  1  1 - X v=0  2  0  2 : v4_081c_ND2H_638.5-640.5_laser_corrected.dat - Overlays
ND2H	B	2	0	2	X	2	0	3	62521.433	1	.00157521091518864	0	rQ2,0(2)	B A2  2  1  1 - X v=0  2  2  0 : v4_081c_ND2H_638.5-640.5_laser_corrected.dat - Overlays
ND2H	B	2	0	2	X	4	0	3	62452.674	1	.000252985363378454	0	pO2,2(4)	B A2  2  1  1 - X v=0  4  2  2 : v4_081c_ND2H_638.5-640.5_laser_corrected.dat - Overlays
ND2H	B	2	1	3	X	1	1	1	62555.451	1	.0124406045600861	0	pR1,1(1)	B A2  2  2  0 - X v=0  1  1  1 : v4_081c_ND2H_638.5-640.5_laser_corrected.dat - Overlays
ND2H	B	2	1	3	X	2	1	2	62534.068	1	.00211780135109436	0	pQ1,1(2)	B A2  2  2  0 - X v=0  2  1  1 : v4_081c_ND2H_638.5-640.5_laser_corrected.dat - Overlays
ND2H	B	2	3	2	X	1	3	2	62553.9	1	.00209650152747053	0	rR1,0(1)	B A2  2  2  1 - X v=0  1  1  0 : v4_081c_ND2H_638.5-640.5_laser_corrected.dat - Overlays
ND2H	B	3	2	2	X	1	2	1	62579.036	1	.00394618428418225	0	rS0,1(1)	B A2  3  1  2 - X v=0  1  0  1 : v4_081c_ND2H_638.5-640.5_laser_corrected.dat - Overlays
ND2H	B	3	0	3	X	2	0	1	62558.416	1	.00139697860967447	0	rR0,2(2)	B A2  3  1  3 - X v=0  2  0  2 : v4_081c_ND2H_638.5-640.5_laser_corrected.dat - Overlays
ND2H	B	3	0	3	X	4	0	1	62500.261	1	.00120160488863878	0	pP0,4(4)	B A2  3  1  3 - X v=0  4  0  4 : v4_081c_ND2H_638.5-640.5_laser_corrected.dat - Overlays
ND2H	B	3	3	4	X	1	3	2	62581.259	1	.00240898873843379	0	rS1,0(1)	B A2  3  2  1 - X v=0  1  1  0 : v4_081c_ND2H_638.5-640.5_laser_corrected.dat - Overlays
ND2H	B	3	0	4	X	2	0	1	62577.738	1	.00164067486577899	0	pR0,2(2)	B A2  3  3  1 - X v=0  2  0  2 : v4_081c_ND2H_638.5-640.5_laser_corrected.dat - Overlays
ND2H	B	4	0	3	X	2	0	1	62597.514	1	.00202989181923748	0	rS0,2(2)	B A2  4  1  3 - X v=0  2  0  2 : v4_081c_ND2H_638.5-640.5_laser_corrected.dat - Overlays
ND2H	B	4	0	3	X	3	0	2	62558.416	1	.000916208504195772	0	rR2,2(3)	B A2  4  1  3 - X v=0  3  2  2 : v4_081c_ND2H_638.5-640.5_laser_corrected.dat - Overlays
ND2H	B	4	1	4	X	2	1	2	62597.514	1	.00327373706165651	0	rS1,1(2)	B A2  4  2  2 - X v=0  2  1  1 : v4_081c_ND2H_638.5-640.5_laser_corrected.dat - Overlays
ND2H	B	4	1	4	X	3	1	1	62577.738	1	.000853206588774129	0	pR1,3(3)	B A2  4  2  2 - X v=0  3  1  3 : v4_081c_ND2H_638.5-640.5_laser_corrected.dat - Overlays
ND2H	B	0	2	1	X	2	2	2	62468.787	1	.00125479576881095	0	pO2,1(2)	B B1  0  0  0 - X v=0  2  2  1 : v4_081c_ND2H_638.5-640.5_laser_corrected.dat - Overlays
ND2H	B	1	0	1	X	2	0	3	62475.374	1	.00441731749882022	0	rP2,0(2)	B B1  1  0  1 - X v=0  2  2  0 : v4_081c_ND2H_638.5-640.5_laser_corrected.dat - Overlays
ND2H	B	1	1	1	X	1	1	1	62507.768	1	.0130965356754386	0	pQ1,1(1)	B B1  1  1  0 - X v=0  1  1  1 : v4_081c_ND2H_638.5-640.5_laser_corrected.dat - Overlays
ND2H	B	1	1	1	X	2	1	2	62486.463	1	.00155894167728817	0	pP1,1(2)	B B1  1  1  0 - X v=0  2  1  1 : v4_081c_ND2H_638.5-640.5_laser_corrected.dat - Overlays
ND2H	B	1	3	1	X	1	3	2	62503.253	1	.00844652682551773	0	rQ1,0(1)	B B1  1  1  1 - X v=0  1  1  0 : v4_081c_ND2H_638.5-640.5_laser_corrected.dat - Overlays
ND2H	B	1	3	1	X	2	3	1	62488.642	1	.000606113794243186	0	pP1,2(2)	B B1  1  1  1 - X v=0  2  1  2 : v4_081c_ND2H_638.5-640.5_laser_corrected.dat - Overlays
ND2H	B	2	2	1	X	1	2	1	62518.497	1	.00431764259585653	0	rR0,1(1)	B B1  2  0  2 - X v=0  1  0  1 : v4_081c_ND2H_638.5-640.5_laser_corrected.dat - Overlays
ND2H	B	2	2	1	X	2	2	2	62488.642	1	.00197835903909829	0	rQ2,1(2)	B B1  2  0  2 - X v=0  2  2  1 : v4_081c_ND2H_638.5-640.5_laser_corrected.dat - Overlays
ND2H	B	2	2	1	X	3	2	3	62458.812	1	.000632099448417668	0	rP2,1(3)	B B1  2  0  2 - X v=0  3  2  1 : v4_081c_ND2H_638.5-640.5_laser_corrected.dat - Overlays
ND2H	B	2	3	1	X	1	3	2	62523.118	1	.00437469548339721	0	rR1,0(1)	B B1  2  1  1 - X v=0  1  1  0 : v4_081c_ND2H_638.5-640.5_laser_corrected.dat - Overlays
ND2H	B	2	1	1	X	1	1	1	62516.537	1	.0134321632931717	0	rR1,1(1)	B B1  2  1  2 - X v=0  1  1  1 : v4_081c_ND2H_638.5-640.5_laser_corrected.dat - Overlays
ND2H	B	2	1	1	X	2	1	2	62495.127	1	.0054485904674122	0	rQ1,1(2)	B B1  2  1  2 - X v=0  2  1  1 : v4_081c_ND2H_638.5-640.5_laser_corrected.dat - Overlays
ND2H	B	2	2	2	X	1	2	1	62532.622	1	.0110882758599266	0	pR0,1(1)	B B1  2  2  0 - X v=0  1  0  1 : v4_081c_ND2H_638.5-640.5_laser_corrected.dat - Overlays
ND2H	B	2	0	1	X	0	0	1	62539.701	1	.0492508938405848	0	rS0,0(0)	B B1  2  2  1 - X v=0  0  0  0 : v4_081c_ND2H_638.5-640.5_laser_corrected.dat - Overlays
ND2H	B	2	0	1	X	2	0	1	62512.901	1	.00397820314526733	0	pQ0,2(2)	B B1  2  2  1 - X v=0  2  0  2 : v4_081c_ND2H_638.5-640.5_laser_corrected.dat - Overlays
ND2H	B	3	0	1	X	2	0	1	62518.497	1	.0084470928630965	0	rR0,2(2)	B B1  3  0  3 - X v=0  2  0  2 : v4_081c_ND2H_638.5-640.5_laser_corrected.dat - Overlays
ND2H	B	3	0	1	X	3	0	2	62478.811	1	.0021286131689351	0	rQ2,2(3)	B B1  3  0  3 - X v=0  3  2  2 : v4_081c_ND2H_638.5-640.5_laser_corrected.dat - Overlays
ND2H	B	3	1	1	X	1	1	1	62548.62	1	.0139086035805154	0	rS1,1(1)	B B1  3  1  2 - X v=0  1  1  1 : v4_081c_ND2H_638.5-640.5_laser_corrected.dat - Overlays
ND2H	B	3	3	1	X	3	3	2	62483.359	1	.000418779125672513	0	rQ1,2(3)	B B1  3  1  3 - X v=0  3  1  2 : v4_081c_ND2H_638.5-640.5_laser_corrected.dat - Overlays
ND2H	B	3	0	2	X	2	0	1	62541.285	1	.00699059748928054	0	pR0,2(2)	B B1  3  2  1 - X v=0  2  0  2 : v4_081c_ND2H_638.5-640.5_laser_corrected.dat - Overlays
ND2H	B	3	2	1	X	1	2	1	62552.165	1	.0156770591689767	0	rS0,1(1)	B B1  3  2  2 - X v=0  1  0  1 : v4_081c_ND2H_638.5-640.5_laser_corrected.dat - Overlays
ND2H	B	3	2	1	X	3	2	3	62492.451	1	.000321209363043195	0	rQ2,1(3)	B B1  3  2  2 - X v=0  3  2  1 : v4_081c_ND2H_638.5-640.5_laser_corrected.dat - Overlays
ND2H	B	3	1	2	X	1	1	1	62565.289	1	.0206659704952416	0	pS1,1(1)	B B1  3  3  0 - X v=0  1  1  1 : v4_081c_ND2H_638.5-640.5_laser_corrected.dat - Overlays
ND2H	B	3	1	2	X	2	1	2	62543.86	1	.00661119677590352	0	pR1,1(2)	B B1  3  3  0 - X v=0  2  1  1 : v4_081c_ND2H_638.5-640.5_laser_corrected.dat - Overlays
ND2H	B	3	3	2	X	1	3	2	62562.577	1	.0163676465042852	0	rS1,0(1)	B B1  3  3  1 - X v=0  1  1  0 : v4_081c_ND2H_638.5-640.5_laser_corrected.dat - Overlays
ND2H	B	4	2	1	X	4	2	2	62466.895	1	.000221046057502163	0	rQ2,3(4)	B B1  4  0  4 - X v=0  4  2  3 : v4_081c_ND2H_638.5-640.5_laser_corrected.dat - Overlays
ND2H	B	4	0	1	X	2	0	1	62562.577	1	.0108209556534434	0	rS0,2(2)	B B1  4  2  3 - X v=0  2  0  2 : v4_081c_ND2H_638.5-640.5_laser_corrected.dat - Overlays
ND2H	B	4	1	2	X	2	1	2	62572.973	1	.00888779034640697	0	rS1,1(2)	B B1  4  3  2 - X v=0  2  1  1 : v4_081c_ND2H_638.5-640.5_laser_corrected.dat - Overlays
ND2H	B	4	2	4	X	2	2	2	62584.586	1	.00400252733492128	0	pS2,1(2)	B B1  4  4  0 - X v=0  2  2  1 : v4_081c_ND2H_638.5-640.5_laser_corrected.dat - Overlays
ND2H	B	4	0	2	X	2	0	1	62595.178	1	.00115203802831405	0	pS0,2(2)	B B1  4  4  1 - X v=0  2  0  2 : v4_081c_ND2H_638.5-640.5_laser_corrected.dat - Overlays
ND2H	B	4	0	2	X	2	0	3	62582.572	1	.00913806609051422	0	rS2,0(2)	B B1  4  4  1 - X v=0  2  2  0 : v4_081c_ND2H_638.5-640.5_laser_corrected.dat - Overlays
ND2H	B	5	2	2	X	3	2	3	62592.536	1	.00138108413959662	0	rS2,1(3)	B B1  5  4  2 - X v=0  3  2  1 : v4_081c_ND2H_638.5-640.5_laser_corrected.dat - Overlays
ND2H	B	5	1	4	X	3	1	3	62602.145	1	.00150976942128969	0	pS3,1(3)	B B1  5  5  0 - X v=0  3  3  1 : v4_081c_ND2H_638.5-640.5_laser_corrected.dat - Overlays
ND2H	B	5	3	5	X	3	3	3	62602.145	1	.000388195318196329	0	rS3,0(3)	B B1  5  5  1 - X v=0  3  3  0 : v4_081c_ND2H_638.5-640.5_laser_corrected.dat - Overlays
"/>
  <FormSettings Name="ResidualWindow" XAxis="Frequency"/>
  <FormSettings Name="LogWindow" ObsFileName="ND2H_b4x0.lin"/>
  <FormSettings Name="ConstantsWindow" ActiveObject="AsymmetricTop: NH3 - ND2H - B - B1"/>
  <FormSettings Name="OverlayWindow" ActiveObject="ExperimentalPlot: ND2H_b4x0.ovr - V4_004_NHD2_638.5-640.5_taken_gautam_laser_corrected.dat"/>
  <FormSettings Name="CalWindow" ActiveObject="2+1 B-X_ND2H warm (101007_007).txt"/>
  <FormSettings Name="LevelWindow" CalcBoth="False" CalcLine="True" JoinHighest="True" TrackQuanta="False" XMax="12" ObsUpper="True">
    <Parameter Name="Ymax" Value="62543.1"/>
    <Parameter Name="Ymin" Value="62444.9"/>
    <Parameter Name="Reduction" Value="6"/>
  </FormSettings>
</Mixture>
