# Supplementary material for: Resonance enhanced multiphoton ionization spectroscopy of NHD2via the B1E′′-state
Source: Royal Society of Chemistry journal article supplement (doi:10.1039/c3cp00012e), 2013-01-01
Supplement: c3cp00012e_9.pgo [file c3cp00012e_9.pgo]

<?xml version="1.0"?>
<Mixture BasisOrder="boDiagonal" AllowComplex="True" Version="Pgopher 7.1.294 14 Dec 2012 9:42 32 bit Unicode (Delphi 23/23)" ShowParts="True" ShowSum="False">
  <Species Name="NH3" Jmax="40">
    <AsymmetricMolecule Name="ND2H" SReduction="True" C2zAxis="b" PointGroup="C2v" Representation="IIIl" eeWt="2" ooWt="2">
      <AsymmetricManifold Name="X" Initial="True">
        <AsymmetricTop Name="v=0">
          <Parameter Name="A" Value="7.44571610800829"/>
          <Parameter Name="B" Value="5.34422284499232"/>
          <Parameter Name="C" Value="3.75295877523377"/>
          <Parameter Name="DK" Value="0.00021649109331"/>
          <Parameter Name="DJK" Value="-0.00048922453879"/>
          <Parameter Name="DJ" Value="0.00033360773205"/>
          <Parameter Name="deltaK" Value="-5.270730259E-5"/>
          <Parameter Name="deltaJ" Value="0.00011290946885"/>
          <Parameter Name="HK" Value="-8.32558336073952E-8"/>
          <Parameter Name="HKJ" Value="1.92454444601138E-7"/>
          <Parameter Name="HJK" Value="-1.7011815220515E-7"/>
          <Parameter Name="HJ" Value="6.5600286048557E-8"/>
          <Parameter Name="phiK" Value="-4.38005615204636E-9"/>
          <Parameter Name="phiJK" Value="2.50100050882534E-8"/>
          <Parameter Name="phiJ" Value="-3.98168972616383E-8"/>
          <Parameter Name="LKKJ" Value="1.41721643978115E-10"/>
          <Parameter Name="LJK" Value="-1.27759418150539E-10"/>
          <Parameter Name="LJJK" Value="6.55713993979128E-11"/>
          <Parameter Name="LJ" Value="-2.02633416481745E-11"/>
          <Parameter Name="llKJ" Value="4.40553144268893E-12"/>
          <Parameter Name="llJK" Value="-1.1186874154119E-11"/>
          <Parameter Name="llJ" Value="1.46377911881959E-11"/>
        </AsymmetricTop>
        <AsymmetricTop Name="v=1" Symmetry="B1">
          <Parameter Name="Origin" Value="0.17074620102684"/>
          <Parameter Name="A" Value="7.44463850424816"/>
          <Parameter Name="B" Value="5.34386570325261"/>
          <Parameter Name="C" Value="3.753232634358"/>
          <Parameter Name="DK" Value="0.00021428221853"/>
          <Parameter Name="DJK" Value="-0.00048566602699"/>
          <Parameter Name="DJ" Value="0.00033205133866"/>
          <Parameter Name="deltaK" Value="-5.246157393E-5"/>
          <Parameter Name="deltaJ" Value="0.00011210335985"/>
          <Parameter Name="HK" Value="-7.52335604119834E-8"/>
          <Parameter Name="HKJ" Value="1.77525710136444E-7"/>
          <Parameter Name="HJK" Value="-1.60856561641721E-7"/>
          <Parameter Name="HJ" Value="6.33245416734266E-8"/>
          <Parameter Name="phiK" Value="-3.95551445126748E-9"/>
          <Parameter Name="phiJK" Value="2.39341247870885E-8"/>
          <Parameter Name="phiJ" Value="-3.82401127649449E-8"/>
          <Parameter Name="LKKJ" Value="1.29665336677683E-10"/>
          <Parameter Name="LJK" Value="-1.06206474346996E-10"/>
          <Parameter Name="LJJK" Value="5.4187470586735E-11"/>
          <Parameter Name="LJ" Value="-1.84466615234196E-11"/>
          <Parameter Name="llKJ" Value="2.85383596941588E-12"/>
          <Parameter Name="llJK" Value="-9.62525081268055E-12"/>
          <Parameter Name="llJ" Value="1.35698300322152E-11"/>
        </AsymmetricTop>
        <AsymmetricTopPerturbation bPower="1" cPower="1" Bra="v=1" Ket="v=0">
          <Parameter Name="Value" Value="0.10395943649789"/>
        </AsymmetricTopPerturbation>
        <AsymmetricTopPerturbation JPower="2" bPower="1" cPower="1" Bra="v=1" Ket="v=0">
          <Parameter Name="Value" Value="-1.839105638E-5"/>
        </AsymmetricTopPerturbation>
      </AsymmetricManifold>
      <AsymmetricManifold Name="B" Initial="True">
        <AsymmetricTop Name="A2" Symmetry="B2" Colour="Navy">
          <Parameter Name="Origin" Value="63370.3492230456" Float="true" Increment="0.1" StdDev="0.0523197794781532"/>
          <Parameter Name="A" Value="6.32478482512596" Float="true" Increment="0.001" StdDev="0.00657591918715321"/>
          <Parameter Name="B" Value="4.50544611222641" Float="true" Increment="0.001" StdDev="0.00923618746793806"/>
          <Parameter Name="C" Value="3.27869374740015" Float="true" Increment="0.001" StdDev="0.00552750493543074"/>
        </AsymmetricTop>
        <AsymmetricTop Name="B1" Colour="Maroon">
          <Parameter Name="Origin" Value="63350.4300581184" Float="true" Increment="0.1" StdDev="0.0642378026550937"/>
          <Parameter Name="A" Value="6.02617837766556" Float="true" Increment="0.001" StdDev="0.0109079950660532"/>
          <Parameter Name="B" Value="4.77817325239908" Float="true" Increment="0.001" StdDev="0.00951797671957062"/>
          <Parameter Name="C" Value="3.27869374740015" Increment="0.001"/>
        </AsymmetricTop>
        <AsymmetricTopPerturbation cPower="1" Bra="A2" Ket="B1">
          <Parameter Name="Value" Value="-5.385081994495" Float="true" StdDev="0.0225941703791508"/>
        </AsymmetricTopPerturbation>
        <AsymmetricTopPerturbation aPower="1" bPower="1" Bra="A2" Ket="B1">
          <Parameter Name="Value" Value="0.191607538526565" Float="true" StdDev="0.0369589701605036"/>
        </AsymmetricTopPerturbation>
      </AsymmetricManifold>
      <TransitionMoments Bra="B" Ket="X">
        <SphericalTransitionMoment Rank="4" Component="2" Bra="A2" Ket="v=1"/>
        <SphericalTransitionMoment Rank="4" Component="-2" Bra="B1" Ket="v=1"/>
      </TransitionMoments>
    </AsymmetricMolecule>
  </Species>
  <Parameter Name="Gaussian" Increment="0.02"/>
  <Parameter Name="Lorentzian" Value="0.5" Increment="0.02"/>
  <Parameter Name="Temperature" Value="30"/>
  <Parameter Name="Fmin" Value="63429.3365875706"/>
  <Parameter Name="Fmax" Value="63442.8394124294"/>
  <Parameter Name="Tspin" Value="300"/>
  <FormSettings Name="ResidualWindow" XAxis="Frequency"/>
  <FormSettings Name="LogWindow" ObsFileName="ND2H_b5x0.lin"/>
  <FormSettings Name="LineWindow" Lines="
ND2H	B	0	3	1	X	2	3	2	63337.775	1	.00189138880831982	0	pO1,1(2)	B A2  0  0  0 - X v=1  2  1  1 : v5_033c_ND2H_630.5-631.8_laser_corrected.dat - Overlays
ND2H	B	1	1	2	X	1	1	2	63366.716	1	.00432577917786118	0	rQ1,0(1)	B A2  1  0  1 - X v=1  1  1  0 : v5_033c_ND2H_630.5-631.8_laser_corrected.dat - Overlays
ND2H	B	1	1	2	X	2	1	1	63351.92	1	.00359127250189618	0	pP1,2(2)	B A2  1  0  1 - X v=1  2  1  2 : v5_033c_ND2H_630.5-631.8_laser_corrected.dat - Overlays
ND2H	B	1	0	1	X	1	0	1	63371.961	1	.0105447757773548	0	pQ0,1(1)	B A2  1  1  0 - X v=1  1  0  1 : v5_033c_ND2H_630.5-631.8_laser_corrected.dat - Overlays
ND2H	B	1	0	1	X	2	0	2	63342.247	1	.00136383607619172	0	pP2,1(2)	B A2  1  1  0 - X v=1  2  2  1 : v5_033c_ND2H_630.5-631.8_laser_corrected.dat - Overlays
ND2H	B	1	0	1	X	3	0	3	63312.586	1	.000992106369887796	0	pO2,1(3)	B A2  1  1  0 - X v=1  3  2  1 : v5_033c_ND2H_630.5-631.8_laser_corrected.dat - Overlays
ND2H	B	1	2	2	X	2	2	1	63354.585	1	.00295686842764285	0	pP0,2(2)	B A2  1  1  1 - X v=1  2  0  2 : v5_033c_ND2H_630.5-631.8_laser_corrected.dat - Overlays
ND2H	B	1	2	2	X	3	2	2	63315.519	1	.000539738284266912	0	pO2,2(3)	B A2  1  1  1 - X v=1  3  2  2 : v5_033c_ND2H_630.5-631.8_laser_corrected.dat - Overlays
ND2H	B	2	3	2	X	1	3	1	63386.276	1	.00407467331659144	0	rR1,1(1)	B A2  2  0  2 - X v=1  1  1  1 : v5_033c_ND2H_630.5-631.8_laser_corrected.dat - Overlays
ND2H	B	2	2	2	X	0	2	1	63399.689	1	.00381509068576245	0	rS0,0(0)	B A2  2  1  1 - X v=1  0  0  0 : v5_033c_ND2H_630.5-631.8_laser_corrected.dat - Overlays
ND2H	B	2	2	2	X	2	2	1	63373.029	1	.00318260700529289	0	pQ0,2(2)	B A2  2  1  1 - X v=1  2  0  2 : v5_033c_ND2H_630.5-631.8_laser_corrected.dat - Overlays
ND2H	B	2	0	3	X	3	0	1	63347.179	1	.00359392027148103	0	pP0,3(3)	B A2  2  1  2 - X v=1  3  0  3 : v5_033c_ND2H_630.5-631.8_laser_corrected.dat - Overlays
ND2H	B	2	3	3	X	3	3	3	63323.766	1	9.44131987439132e-5	0	qP3,0(3)	B A2  2  2  0 - X v=0  3  3  0 : v5_033c_ND2H_630.5-631.8_laser_corrected.dat - Overlays
ND2H	B	2	3	3	X	3	3	4	63323.766	1	.000100203178978675	0	pP3,1(3)	B A2  2  2  0 - X v=1  3  3  1 : v5_033c_ND2H_630.5-631.8_laser_corrected.dat - Overlays
ND2H	B	2	1	2	X	1	1	2	63391.89	1	.00291435071603117	0	rR1,0(1)	B A2  2  2  1 - X v=1  1  1  0 : v5_033c_ND2H_630.5-631.8_laser_corrected.dat - Overlays
ND2H	B	2	1	2	X	2	1	1	63376.698	1	.0071671207296149	0	pQ1,2(2)	B A2  2  2  1 - X v=1  2  1  2 : v5_033c_ND2H_630.5-631.8_laser_corrected.dat - Overlays
ND2H	B	2	1	2	X	3	1	4	63323.766	1	.000340980799829448	0	rP3,0(3)	B A2  2  2  1 - X v=1  3  3  0 : v5_033c_ND2H_630.5-631.8_laser_corrected.dat - Overlays
ND2H	B	3	1	3	X	2	1	1	63395.798	1	.00391268964801556	0	rR1,2(2)	B A2  3  0  3 - X v=1  2  1  2 : v5_033c_ND2H_630.5-631.8_laser_corrected.dat - Overlays
ND2H	B	3	0	2	X	1	0	1	63417.783	1	.00714014675958344	0	rS0,1(1)	B A2  3  1  2 - X v=1  1  0  1 : v5_033c_ND2H_630.5-631.8_laser_corrected.dat - Overlays
ND2H	B	3	0	2	X	2	0	2	63387.998	1	.00186470542504367	0	rR2,1(2)	B A2  3  1  2 - X v=1  2  2  1 : v5_033c_ND2H_630.5-631.8_laser_corrected.dat - Overlays
ND2H	B	3	0	2	X	3	0	1	63374.736	1	.00242876846329311	0	pQ0,3(3)	B A2  3  1  2 - X v=1  3  0  3 : v5_033c_ND2H_630.5-631.8_laser_corrected.dat - Overlays
ND2H	B	3	1	4	X	1	1	2	63419.269	1	.00390718798303847	0	rS1,0(1)	B A2  3  2  1 - X v=1  1  1  0 : v5_033c_ND2H_630.5-631.8_laser_corrected.dat - Overlays
ND2H	B	3	1	4	X	2	1	1	63403.944	1	.00294558794900281	0	pR1,2(2)	B A2  3  2  1 - X v=1  2  1  2 : v5_033c_ND2H_630.5-631.8_laser_corrected.dat - Overlays
ND2H	B	3	1	4	X	3	1	2	63369.899	1	.00101869817247369	0	pQ1,2(3)	B A2  3  2  1 - X v=1  3  1  2 : v5_033c_ND2H_630.5-631.8_laser_corrected.dat - Overlays
ND2H	B	3	3	3	X	3	3	1	63379.435	1	.00162735220832731	0	pQ1,3(3)	B A2  3  2  2 - X v=1  3  1  3 : v5_033c_ND2H_630.5-631.8_laser_corrected.dat - Overlays
ND2H	B	3	0	3	X	1	0	1	63431.392	1	.000697260140078824	0	pS0,1(1)	B A2  3  3  0 - X v=1  1  0  1 : v5_033c_ND2H_630.5-631.8_laser_corrected.dat - Overlays
ND2H	B	3	2	4	X	2	2	1	63413.61	1	.000876803396394101	0	pR0,2(2)	B A2  3  3  1 - X v=1  2  0  2 : v5_033c_ND2H_630.5-631.8_laser_corrected.dat - Overlays
ND2H	B	4	2	3	X	2	2	1	63436.088	1	.00107598201015436	0	rS0,2(2)	B A2  4  1  3 - X v=1  2  0  2 : v5_033c_ND2H_630.5-631.8_laser_corrected.dat - Overlays
ND2H	B	4	3	4	X	2	3	2	63434.78	1	.00148638970948912	0	rS1,1(2)	B A2  4  2  2 - X v=1  2  1  1 : v5_033c_ND2H_630.5-631.8_laser_corrected.dat - Overlays
ND2H	B	4	1	3	X	2	1	1	63438.768	1	.0011391643262967	0	rS1,2(2)	B A2  4  2  3 - X v=1  2  1  2 : v5_033c_ND2H_630.5-631.8_laser_corrected.dat - Overlays
ND2H	B	4	3	5	X	3	3	3	63407.755	1	.000178997971478463	0	qR3,0(3)	B A2  4  4  0 - X v=0  3  3  0 : v5_033c_ND2H_630.5-631.8_laser_corrected.dat - Overlays
ND2H	B	4	3	5	X	3	3	4	63407.755	1	.00019883481142286	0	pR3,1(3)	B A2  4  4  0 - X v=1  3  3  1 : v5_033c_ND2H_630.5-631.8_laser_corrected.dat - Overlays
ND2H	B	4	1	4	X	3	1	4	63407.755	1	.000705503258801165	0	rR3,0(3)	B A2  4  4  1 - X v=1  3  3  0 : v5_033c_ND2H_630.5-631.8_laser_corrected.dat - Overlays
ND2H	B	0	0	1	X	2	0	2	63311.993	1	.00272767215238344	0	pO2,1(2)	B B1  0  0  0 - X v=1  2  2  1 : v5_033c_ND2H_630.5-631.8_laser_corrected.dat - Overlays
ND2H	B	1	2	1	X	2	2	3	63318.265	1	.00329801010836244	0	rP2,0(2)	B B1  1  0  1 - X v=1  2  2  0 : v5_033c_ND2H_630.5-631.8_laser_corrected.dat - Overlays
ND2H	B	1	3	1	X	1	3	1	63350.084	1	.00474390746837482	0	pQ1,1(1)	B B1  1  1  0 - X v=1  1  1  1 : v5_033c_ND2H_630.5-631.8_laser_corrected.dat - Overlays
ND2H	B	1	3	1	X	2	3	2	63329.092	1	.000945694404159912	0	pP1,1(2)	B B1  1  1  0 - X v=1  2  1  1 : v5_033c_ND2H_630.5-631.8_laser_corrected.dat - Overlays
ND2H	B	1	1	1	X	1	1	2	63345.547	1	.0132115595742481	0	rQ1,0(1)	B B1  1  1  1 - X v=1  1  1  0 : v5_033c_ND2H_630.5-631.8_laser_corrected.dat - Overlays
ND2H	B	2	0	1	X	1	0	1	63360.247	1	.00645869785900403	0	rR0,1(1)	B B1  2  0  2 - X v=1  1  0  1 : v5_033c_ND2H_630.5-631.8_laser_corrected.dat - Overlays
ND2H	B	2	0	1	X	2	0	2	63330.852	1	.0055902091320393	0	rQ2,1(2)	B B1  2  0  2 - X v=1  2  2  1 : v5_033c_ND2H_630.5-631.8_laser_corrected.dat - Overlays
ND2H	B	2	1	1	X	1	1	2	63364.98	1	.00686952550540082	0	rR1,0(1)	B B1  2  1  1 - X v=1  1  1  0 : v5_033c_ND2H_630.5-631.8_laser_corrected.dat - Overlays
ND2H	B	2	1	1	X	2	1	1	63350.084	1	.00306679625450798	0	pQ1,2(2)	B B1  2  1  1 - X v=1  2  1  2 : v5_033c_ND2H_630.5-631.8_laser_corrected.dat - Overlays
ND2H	B	2	1	1	X	3	1	2	63316.401	1	.000596654168364245	0	pP1,2(3)	B B1  2  1  1 - X v=1  3  1  2 : v5_033c_ND2H_630.5-631.8_laser_corrected.dat - Overlays
ND2H	B	2	3	1	X	1	3	1	63358.419	1	.00507019878862274	0	rR1,1(1)	B B1  2  1  2 - X v=1  1  1  1 : v5_033c_ND2H_630.5-631.8_laser_corrected.dat - Overlays
ND2H	B	2	3	1	X	2	3	2	63337.167	1	.00339342216380461	0	rQ1,1(2)	B B1  2  1  2 - X v=1  2  1  1 : v5_033c_ND2H_630.5-631.8_laser_corrected.dat - Overlays
ND2H	B	2	0	2	X	1	0	1	63373.809	1	.0217936909889965	0	pR0,1(1)	B B1  2  2  0 - X v=1  1  0  1 : v5_033c_ND2H_630.5-631.8_laser_corrected.dat - Overlays
ND2H	B	2	2	1	X	0	2	1	63380.819	1	.0143096170465425	0	rS0,0(0)	B B1  2  2  1 - X v=1  0  0  0 : v5_033c_ND2H_630.5-631.8_laser_corrected.dat - Overlays
ND2H	B	3	2	1	X	2	2	1	63360.247	1	.00460762824793803	0	rR0,2(2)	B B1  3  0  3 - X v=1  2  0  2 : v5_033c_ND2H_630.5-631.8_laser_corrected.dat - Overlays
ND2H	B	3	2	1	X	3	2	2	63321.108	1	.00106059529100282	0	rQ2,2(3)	B B1  3  0  3 - X v=1  3  2  2 : v5_033c_ND2H_630.5-631.8_laser_corrected.dat - Overlays
ND2H	B	3	3	1	X	3	3	3	63320.182	1	.000131438711025894	0	sQ3,0(3)	B B1  3  1  2 - X v=0  3  3  0 : v5_033c_ND2H_630.5-631.8_laser_corrected.dat - Overlays
ND2H	B	3	3	1	X	1	3	1	63389.714	1	.00552599999596758	0	rS1,1(1)	B B1  3  1  2 - X v=1  1  1  1 : v5_033c_ND2H_630.5-631.8_laser_corrected.dat - Overlays
ND2H	B	3	3	1	X	3	3	4	63320.182	1	.000140322578872485	0	rQ3,1(3)	B B1  3  1  2 - X v=1  3  3  1 : v5_033c_ND2H_630.5-631.8_laser_corrected.dat - Overlays
ND2H	B	3	1	1	X	2	1	1	63358.988	1	.0106025292047418	0	rR1,2(2)	B B1  3  1  3 - X v=1  2  1  2 : v5_033c_ND2H_630.5-631.8_laser_corrected.dat - Overlays
ND2H	B	3	1	1	X	3	1	2	63325.51	1	.00207003411631599	0	rQ1,2(3)	B B1  3  1  3 - X v=1  3  1  2 : v5_033c_ND2H_630.5-631.8_laser_corrected.dat - Overlays
ND2H	B	3	2	2	X	2	2	1	63381.645	1	.00348582949235882	0	pR0,2(2)	B B1  3  2  1 - X v=1  2  0  2 : v5_033c_ND2H_630.5-631.8_laser_corrected.dat - Overlays
ND2H	B	3	0	1	X	1	0	1	63392.726	1	.0226966183607925	0	rS0,1(1)	B B1  3  2  2 - X v=1  1  0  1 : v5_033c_ND2H_630.5-631.8_laser_corrected.dat - Overlays
ND2H	B	3	0	1	X	3	0	3	63332.786	1	.000672206220977054	0	rQ2,1(3)	B B1  3  2  2 - X v=1  3  2  1 : v5_033c_ND2H_630.5-631.8_laser_corrected.dat - Overlays
ND2H	B	3	3	2	X	1	3	1	63405.031	1	.00733385593691159	0	pS1,1(1)	B B1  3  3  0 - X v=1  1  1  1 : v5_033c_ND2H_630.5-631.8_laser_corrected.dat - Overlays
ND2H	B	3	3	2	X	2	3	2	63383.552	1	.00337282808906246	0	pR1,1(2)	B B1  3  3  0 - X v=1  2  1  1 : v5_033c_ND2H_630.5-631.8_laser_corrected.dat - Overlays
ND2H	B	3	1	2	X	1	1	2	63401.983	1	.0263984943705836	0	rS1,0(1)	B B1  3  3  1 - X v=1  1  1  0 : v5_033c_ND2H_630.5-631.8_laser_corrected.dat - Overlays
ND2H	B	3	1	2	X	2	1	1	63386.968	1	.00186338794245117	0	pR1,2(2)	B B1  3  3  1 - X v=1  2  1  2 : v5_033c_ND2H_630.5-631.8_laser_corrected.dat - Overlays
ND2H	B	4	0	1	X	3	0	1	63358.419	1	.00534288431655978	0	rR0,3(3)	B B1  4  0  4 - X v=1  3  0  3 : v5_033c_ND2H_630.5-631.8_laser_corrected.dat - Overlays
ND2H	B	4	1	1	X	2	1	1	63401.513	1	.00966718730579742	0	rS1,2(2)	B B1  4  1  3 - X v=1  2  1  2 : v5_033c_ND2H_630.5-631.8_laser_corrected.dat - Overlays
ND2H	B	4	1	2	X	2	1	1	63422.389	1	.00259772669638225	0	pS1,2(2)	B B1  4  3  1 - X v=1  2  1  2 : v5_033c_ND2H_630.5-631.8_laser_corrected.dat - Overlays
ND2H	B	4	1	2	X	3	1	2	63388.464	1	.0023017592351146	0	pR1,2(3)	B B1  4  3  1 - X v=1  3  1  2 : v5_033c_ND2H_630.5-631.8_laser_corrected.dat - Overlays
ND2H	B	4	3	2	X	2	3	2	63411.95	1	.00580478360079171	0	rS1,1(2)	B B1  4  3  2 - X v=1  2  1  1 : v5_033c_ND2H_630.5-631.8_laser_corrected.dat - Overlays
ND2H	B	4	0	4	X	2	0	2	63422.389	1	.0073265858461832	0	pS2,1(2)	B B1  4  4  0 - X v=1  2  2  1 : v5_033c_ND2H_630.5-631.8_laser_corrected.dat - Overlays
ND2H	B	4	2	2	X	2	2	3	63420.219	1	.00507100924414649	0	rS2,0(2)	B B1  4  4  1 - X v=1  2  2  0 : v5_033c_ND2H_630.5-631.8_laser_corrected.dat - Overlays
ND2H	B	5	2	1	X	4	2	1	63355.585	1	.000854049337028672	0	rR0,4(4)	B B1  5  0  5 - X v=1  4  0  4 : v5_033c_ND2H_630.5-631.8_laser_corrected.dat - Overlays
ND2H	B	5	1	1	X	4	1	1	63355.585	1	.00172281240376179	0	rR1,4(4)	B B1  5  1  5 - X v=1  4  1  4 : v5_033c_ND2H_630.5-631.8_laser_corrected.dat - Overlays
ND2H	B	5	0	1	X	3	0	1	63411.214	1	.00402023059159746	0	rS0,3(3)	B B1  5  2  4 - X v=1  3  0  3 : v5_033c_ND2H_630.5-631.8_laser_corrected.dat - Overlays
ND2H	B	5	1	2	X	3	1	2	63420.219	1	.00322650196100392	0	rS1,2(3)	B B1  5  3  3 - X v=1  3  1  2 : v5_033c_ND2H_630.5-631.8_laser_corrected.dat - Overlays
ND2H	B	5	0	2	X	3	0	3	63429.384	1	.00283731026901846	0	rS2,1(3)	B B1  5  4  2 - X v=1  3  2  1 : v5_033c_ND2H_630.5-631.8_laser_corrected.dat - Overlays
ND2H	B	5	3	4	X	3	3	3	63437.43	1	.000355060743245064	0	qS3,0(3)	B B1  5  5  0 - X v=0  3  3  0 : v5_033c_ND2H_630.5-631.8_laser_corrected.dat - Overlays
ND2H	B	5	3	4	X	3	3	4	63437.43	1	.000389194205414366	0	pS3,1(3)	B B1  5  5  0 - X v=1  3  3  1 : v5_033c_ND2H_630.5-631.8_laser_corrected.dat - Overlays
ND2H	B	5	1	5	X	3	1	4	63437.43	1	.00134962103734731	0	rS3,0(3)	B B1  5  5  1 - X v=1  3  3  0 : v5_033c_ND2H_630.5-631.8_laser_corrected.dat - Overlays
"/>
  <FormSettings Name="ConstantsWindow" ActiveObject="AsymmetricTop: NH3 - ND2H - B - B1"/>
  <FormSettings Name="OverlayWindow" ActiveObject="ExperimentalPlot: ND2H_b5x0.ovr - V5_012_NHD2_630.5-631.8_taken_gautam_laser_corrected.dat"/>
  <FormSettings Name="CalWindow" ActiveObject="2+1 B-X_ND2H warm (101007_007).txt"/>
  <FormSettings Name="LevelWindow" CalcBoth="False" CalcLine="True" JoinHighest="True" TrackQuanta="False" XMax="12" ObsUpper="True">
    <Parameter Name="Ymax" Value="59400"/>
    <Parameter Name="Ymin" Value="59195"/>
    <Parameter Name="Reduction" Value="7"/>
  </FormSettings>
</Mixture>
